# Supplementary material
Source: PubMed Central journal article supplement (PMC7901222)
Supplement: 13293_2021_366_MOESM1_ESM.pdf [file 13293_2021_366_MOESM1_ESM.pdf]

## Gender-Related Variables for Health Research

### Supplementary Information (SI) Text

#### Methods: Documentation of Literature survey

Here we document the systematic literature search that guided our development of the gender variables. The description of the literature survey is divided into five steps. Step 1 specifies the test-specific literature searches in PsycInfo, PsycNet, and PubMed with respect to database specific search limitations, search terms and selection criteria. Step 2 lists all of the gender measures derived from the articles identified through the searches in PsycInfo, PsycNet and PubMed. In Step 3, we sort the identified gender measures into three overarching categories for analyzing gender (norms, identity and relations), and use citation frequencies to determine the prevalence and use of each scale in the literature. In Step 4, we identify the core traits and characteristics of relevance to each of the three categories of gender-related traits, gender norms, and gender relations. Finally, Step 5 documents the search strategy used to identify additional construct specific measures of relevance to our gender variables.

#### Step 1: Test-specific literature search in PsycINFO, PsycNET, and PubMed

This section specifies our search strategy. We carried out systematic searches in PsychINFO, PsycNET, and PubMed. We restricted the time span to the period from January 1975 through 2015.

**Search limitations.** We used the following database-specific search limitations:

PsycINFO: Document type: Research literature in peer reviewed scholarly journals; Language: English; Population: Human; Classification: “Personality Scales & Inventories”; “Tests & Testing”.

PsycNet: Age-group: Adulthood (18 years or older); Document type: Abstract collection, Peer-reviewed articles; PsycNET Classifiers: “Tests and testing”; “Personality Scales & Inventories”; “Clinical Psychological Testing”; “Health Psychology Testing”; “Educational measurement”; “Occupational and employment testing”; “Consumer opinion and attitudes”.

PUBMED: Ages: all ages; Species: Humans; Language: English; Article types: all.

1. The search was narrowed to the following gender/sex related MeSH-terms: “gender identity”; “sex”; “sexism”; “interpersonal relations”; “female”; “male”. We excluded: “sexual and gender disorders”; “gender dysphoria”; “sex reassignment surgery”; “sex reassignment procedures.
2. We narrowed our search to the following “test-related” MeSH terms: “psychological tests”; “neuropsychological tests”; “personality tests”; “psychometrics”; “pain measurement”; “behavior rating scale”; “thematic

apperception test”; “test anxiety scale”; “personal construct theory”; “Wechsler scales”; “personality assessment”.

**Search strings.** We used the following search strings in the three databases:

PsycINFO: ("Gender Identity" OR "Gender Gap" OR "Gender Equality" OR "Sex Role Attitudes" OR "Sex Roles")

PsycNet: (“Gender” OR “Sex”) NOT (“sexual”)

PubMed: (Psychological tests[mh] OR Neuropsychological tests[mh] OR Personality tests[mh] OR Psychometrics[mh] OR Pain measurement[mh] OR Behavior rating scale[mh] OR Thematic Apperception Test[mh] OR Test anxiety scale[mh] OR Personal Construct Theory[mh] OR Wechsler Scales[mh] OR Personality Assessment[mh]) AND (Sex[mh] OR Gender identity[mh] OR Interpersonal relations[mh] OR Sexism[mh] OR women[mh] OR men[mh] or female [mh] OR male [mh]) AND (scale\*[ti] OR measure\*[ti] OR compos\*[ti] OR inventor\*[ti] OR index\*[ti] OR indic\*[ti] OR score\*[ti] OR psychomet\*[ti] OR instrument\*[ti] OR batter\*[ti] OR assess\*[ti] OR test\*[ti] OR rating\*[ti]) AND (Gender\*[ti] OR sex[ti] OR sexes[ti] OR mascu\*[ti] OR femin\*[ti] OR male[ti] OR males[ti] OR female\*[ti] OR man[ti] OR woman[ti] OR men[ti]] OR women[ti] OR androgy\*[ti] OR boy[ti] OR girl[ti] OR boys[ti] OR girls[ti]).

The literature on gender- and sex-related scales is extremely extensive and for reasons of feasibility, it will not be possible to capture everything through a broad search in PubMed.

An important caveat related to our selected search string in PubMed is the emphasis on gender/ sex related search terms in abstract titles. To provide a concrete example: Our search string may not capture potentially relevant scales that do not include the following terms in their titles: (Gender\*[ti] OR sex[ti] OR sexes[ti] OR mascu\*[ti] OR femin\*[ti] OR male[ti] OR males[ti] OR female\*[ti] OR man[ti] OR woman[ti] OR men[ti]] OR women[ti] OR androgy\*[ti] OR boy[ti] OR girl[ti] OR boys[ti] OR girls[ti]). However, for influential scales we will likely capture several follow up studies adapting or testing the validity of these scales. Test of coverage is captured in a later step.

The search strings presented above returned 519 studies in PsycINFO, 432 studies in PsycNET and 2030 studies in PubMed (Fig. S1).

**Selection criteria.** We read through abstract and titles and used the following selection criteria to identify relevant publications:

All studies with scales or tests measuring aspects of gender are eligible, regardless of purpose of use in article (+); articles using non-gender related measures to illuminate gender differences on a given trait or topic (-); articles focusing on children or adolescents (17 years old or younger) (-); articles capturing scales

measuring issues of gender norms or relations (e.g. child-rearing, romantic relationships, division of domestic labor) (+); articles capturing scales concerning sexuality, sexual health, sexual violence, domestic violence and issues of gender- and sex development in childhood and adolescence (-) and body image (-).

**Eligible publications.** Using these, we identified 405 eligible publications: 315 in PsycINFO, 65 in PsychNET and 89 in PubMed. Of these, 64 publications were duplicates or triplicates (Fig. S1)

### **Step 2: Identifying measures of gender**

As a second step in the review process, we searched through all of the 405 eligible references to identify relevant gender measures employed in each paper. We derived 127 unique gender measures through this approach. Four additional gender measures were identified through literature reviews published in books.

### **Step 3: Sorting and determining the impact of gender measures**

As a third step in the review process, we sorted the 131 gender measures into three overarching categories for analyzing gender (norms, identity and relations). Given the large number of gender measures, we decided to use citation frequencies to determine the prevalence and use of each measure in the literature. All measures receiving at least 20 citations in Google Scholar within the last ten years were selected for further investigation, of which 74 scales met the criteria. All articles published from 2006-2015 were retained for further investigation. All articles published in 2005 or earlier, with less than 20 citations in Google Scholar were assorted into the “Ineligible Scales” category. This category also comprises measures that we found irrelevant after reading through abstract and full text. The scales assorted into each category (norms, identity and relations) are ranked based on their citation impact. Ineligible scales are listed at the bottom of this section.

### **Gender norms (N=3)**

#### **Coparenting and Family Rating System**

**Original scale:** McHale, J. P., Kuersten-Hogan, R., & Lauretti, A. (2000). Evaluating coparenting and family-level dynamics during infancy and early childhood: The Coparenting and Family Rating System. *Family observational coding systems: Resources for systemic research*, 151-170.

Web of Science (2006->): Missing

Google scholar (2006->): 57

#### **Parental Child-rearing Behaviour Scale**

**Original scale:** Meunier, J. C., & Roskam, I. (2007). Psychometric properties of a parental childrearing behavior scale for French-speaking parents, children, and adolescents. *European Journal of Psychological Assessment*, 23(2), 113-124.

Web of Science (2006->): 17 (full database), 3 (health-related subject categories)

Google scholar (2006->): 29

#### **The Orientation towards Domestic Labor**

**Original scale:** Hawkins, A. J., Marshall, C. M., & Allen, S. M. (1998). The Orientation Toward Domestic Labor Questionnaire: Exploring dual-earner wives' sense of fairness about family work. *Journal of Family Psychology, 12*(2), 244.  
Web of Science (2006->): 7 (full database)  
Google scholar (2006->): 28

## Gender-related traits (N=31)

### **Bem Sex Role Inventory**

**Original scale:** Bem, S. L. (1974). The measurement of psychological androgyny. *Journal of consulting and clinical psychology, 42*, 155-162  
Web of Science (2006->): 802 (full database), 100 (health research)  
Google scholar (2006->): 3670

### **Minnesota Multiphasic Personality Inventory (broader, including masc. and fem.)**

**Original scale:** Hathaway, S. R., & McKinley, J. C. (1951). Minnesota Multiphasic Personality Inventory; manual (Revised).  
Web of Science (2006->): Missing  
Google scholar (2006->): 937

### **Conformity to Masculine Norms Inventory**

**Original scale:** Mahalik, J. R., Locke, B. D., Ludlow, L. H., Diemer, M. A., Scott, R. P., Gottfried, M., & Freitas, G. (2003). Development of the Conformity to Masculine Norms Inventory. *Psychology of Men & Masculinity, 4*(1), 3.  
Web of Science (2006->) Missing  
Google scholar (2006->): 676

### **Gender Role Conflict Scale**

**Original scale:** O'Neil, J. M., Helms, B. J., Gable, R. K., David, L., & Wrightsman, L. S. (1986). Gender-Role Conflict Scale: College men's fear of femininity. *Sex roles, 14*(5-6), 335-350.  
Web of Science (2006->): 185 (full database), 20 (health research)  
Google scholar (2006->): 576

### **Personal Attributes Questionnaire**

**Original scale:** Spence, J. T., Helmreich, R. L., & Stapp, J. (1974). The Personal Attributes Questionnaire: A measure of sex role stereotypes and masculinity-femininity.  
Web of Science (2006->): Missing  
Google scholar (2006->): 428

### **Male Role Norms Scale**

**Original scale:** Thompson, E. H., & Pleck, J. H. (1986). The structure of male role norms. *The American Behavioral Scientist, 29*(5), 531.  
Web of Science (2006->): 142 (full database) 15 (health)  
Google scholar (2006->): 368

### **Masculinity Ideology**

**Original scale:** Pleck, J. H., Sonenstein, F. L., & Ku, L. C. (1993). Masculinity ideology: Its impact on adolescent males' heterosexual relationships. *Journal of Social issues, 49*(3), 11-29.  
Web of Science (2006->): 131 (full database), 69 (health research)  
Google scholar (2006->): 312

### **Californian Psychological Inventory**

**Original scale:** Gough, H. G. (1975). *Manual for the California psychological inventory*. Consulting Psychologists Press.  
Web of Science (2006->): Missing  
Google scholar (2006->): 314

**Masculine Gender Role Stress**

**Original scale:** Eisler, R. M., & Skidmore, J. R. (1987). Masculine gender role stress scale development and component factors in the appraisal of stressful situations. *Behavior Modification, 11*(2), 123-136.

Web of Science (2006->): 100 (full database), 19 (health)

Google scholar (2006->): 301

**Traditional Machismo and Caballerismo Scale**

**Original scale:** Arciniega, G. M., Anderson, T. C., Tovar-Blank, Z. G., & Tracey, T. J. (2008). Toward a fuller conception of Machismo: Development of a traditional Machismo and Caballerismo Scale. *Journal of Counseling Psychology, 55*(1), 19.

Web of Science (2006->): 100 (full database), 33 (health research)

Google scholar (2006->): 276

**Conformity to Feminine Norms Inventory**

**Original scale:** Mahalik, J. R., Morray, E. B., Coonerty-Femiano, A., Ludlow, L. H., Slattery, S. M., & Smiler, A. (2005). Development of the conformity to feminine norms inventory. *Sex Roles, 52*(7-8), 417-435.

Web of Science (2006->): 82 (full database), 17 (health research)

Google scholar (2006->): 241

**Male Role Norms Inventory**

**Original scale:** Levant, R. F., Hirsch, L. S., Celentano, E., & Cozza, T. M. (1992). The male role: An investigation of contemporary norms. *Journal of Mental Health Counseling.*

Web of Science (2006->): Missing

Google scholar (2006->): 191

**Hypermasculinity Inventory**

**Original scale:** Mosher, D. L., & Sirkin, M. (1984). Measuring a macho personality constellation. *Journal of Research in Personality, 18*(2), 150-163.

Web of Science (2006=>): 83 (full database), 4 (health research)

Citations Google (2006=>): 251

**Brannon Masculinity Scale**

**Original scale:** Brannon, R., & Juni, S. (1984). A scale for measuring attitudes about masculinity. *Psychological Documents, 14.*

Web of Science (2006->): 2 (full database)

Google scholar (2006->): 141

**Feminine Gender Role Stress**

**Original scale:** Gillespie, B. L., & Eisler, R. M. (1992). Development of the feminine gender role stress scale: A cognitive-behavioral measure of stress, appraisal, and coping for women. *Behavior Modification, 16*(3), 426-438.

Web of Science (2006->): 31 (full database)

Google scholar (2006->): 78

**Hyperfemininity**

**Original scale:** Murnen, S. K., & Byrne, D. (1991). Hyperfemininity: Measurement and Initial Validation of the Construct. *The Journal of Sex Research, 479-489.*

Web of Science (2006->): 31 (full database) 4 (health)

Google scholar (2006->): 76

**Adjective Check List (Masculinity and Femininity scales)**

**Original scale:** Zuckerman, M. (1960). The development of an affect adjective check list for the measurement of anxiety. *Journal of Consulting Psychology, 24*(5), 457.

Web of Science (2006->): 14 (full database)  
Google scholar (2006->): 72

#### **Normative Male Alexithymia Scale**

**Original scale:** Levant, R. F., Good, G. E., Cook, S. W., O'Neil, J. M., Smalley, K. B., Owen, K., & Richmond, K. (2006). The normative Male Alexithymia Scale: Measurement of a gender-linked syndrome. *Psychology of Men & Masculinity*, 7(4), 212.

Web of Science (2006->): Missing  
Google scholar (2006->): 65

#### **Japanese Gender Role Index**

**Original scale:** Sugihara, Y., & Katsurada, E. (2002). Gender role development in Japanese culture: Diminishing gender role differences in a contemporary society. *Sex roles*, 47(9-10), 443-452.

Web of Science (2006->): 13 (full database) 2 (health)  
Google scholar (2006->): 44

#### **Femininity Ideology Scale**

**Original scale:** Levant, R., Richmond, K., Cook, S., House, A. T., & Aupont, M. (2007). The femininity ideology scale: Factor structure, reliability, convergent and discriminant validity, and social contextual variation. *Sex Roles*, 57, 373-383.

Web of Science (2006=>): 15 (full database), 3 (health research)  
Google scholar (2006=>): 42

#### **Gender Role Journey Measure**

**Original scale:** O'Neil, J. M., Egan, J., Owen, S. V., & Murry, V. M. (1993). The gender role journey measure: Scale development and psychometric evaluation. *Sex Roles*, 28(3-4), 167-185.

Web of science (2006=>): 10 (full database), 1 (health research)  
Google scholar (2006=>): 43

#### **Auburn Differential Masculinity Inventory**

**Original scale:** Burk, L. R., Burkhart, B. R., & Sikorski, J. F. (2004). Construction and Preliminary Validation of the Auburn Differential Masculinity Inventory. *Psychology of Men & Masculinity*, 5(1), 4.

Web of Science (2006->): Missing  
Google scholar (2006=>): 36

#### **PRF Andro Scale (Personality Research Form)**

**Original scale:** Berzins, J. I., Welling, M. A., & Wetter, R. E. (1978). A new measure of psychological androgyny based on the Personality Research Form. *Journal of consulting and clinical psychology*, 46(1), 126.

Web of Science (2006->): 8 (full database), 1 (health research)  
Google scholar (2006->): 33

#### **Sex-Role Identity Scale**

**Original scale:** Storms, M. D. (1979). Sex role identity and its relationships to sex role attributes and sex role stereotypes. *Journal of Personality and Social Psychology*, 37(10), 1779.

Web of science (2006=>): 15 (full database), 2 (health research)  
Google scholar (2006=>): 27

#### **New Masculine Gender Role Discrepancy**

**Original scale:** Rummell, C. M., & Levant, R. F. (2014). Masculine gender role discrepancy strain and self-esteem. *Psychology of Men & Masculinity*, 15(4), 419.

Too new for citations

#### **Russian Male Norms Inventory**

**Original scale:** Janey, B. A., Kim, T., Jampolskaja, T., Khuda, A., Larionov, A., Maksimenko, A., ... & Shipilova, A. (2013). Development of the Russian Male Norms Inventory. *Psychology of Men & Masculinity*, 14(2), 138.

Too new for citations

#### **Measurement of Men's Perceived Inexpressiveness**

**Original scale:** Wong, Y. J., Horn, A. J., Gomory, A. M., & Ramos, E. (2013). Measure of Men's Perceived Inexpressiveness Norms (M2PIN): Scale development and psychometric properties. *Psychology of Men & Masculinity*, 14(3), 288.

Too new for citations

#### **Positive Negative Sex-role Inventory**

**Original scale:** Berger, A., & Krahe, B. (2013). Negative attributes are gendered too: Conceptualizing and measuring positive and negative facets of sex-role identity. *European Journal of Social Psychology*, 43(6), 516-531.

Too new for citations

#### **Social Roles Questionnaire**

**Original scale:** Baber, K. M., & Tucker, C. J. (2006). The social roles questionnaire: A new approach to measuring attitudes toward gender. *Sex Roles*, 54(7-8), 459-467.

Too new for citations

#### **Indian Gender role identity**

Basu, J. (2010). Development of the Indian gender role identity scale. *Journal of the Indian Academy of Applied Psychology*, 36(1), 25-34.

Too new for citations

#### **Inventory of Subjective Masculinity**

Wong, Y. J., Shea, M., Lafollette, J. R., Hickman, S. J., Cruz, N., & Boghokian, T. (2011). The inventory of subjective masculinity experiences: Development and psychometric properties. *The Journal of Men's Studies*, 19(3), 236-255.

Too new for citations

### **Gender Relations (N=40)**

#### **The Ambivalent Sexism Inventory**

**Original scale:** Glick, P., & Fiske, S. T. (1996). The ambivalent sexism inventory: Differentiating hostile and benevolent sexism. *Journal of personality and social psychology*, 70(3), 491.

Web of Science (2006=>): 792 (full database), 41 (health research)

Google scholar (2006=>): 1960

#### **Modern and Old-fashioned Sexism**

**Original scale:** Swim, J. K., Aikin, K. J., Hall, W. S., & Hunter, B. A. (1995). Sexism and racism: Old-fashioned and modern prejudices. *Journal of Personality and Social Psychology*, 68, 199-214

Web of Science (2006=>): 306 (full database), 12 (health research)

Google scholar (2006=>): 801

#### **Dyadic Adjustment Scale across Gender**

**Original scale:** Christensen, A., & Heavey, C. L. (1990). Gender and social structure in the demand/withdraw pattern of marital conflict. *Journal of personality and social psychology*, 59(1), 73.

Web of science (2006=>): 193 (full database), 10 (health research)

Google scholar (2006=>): 488

#### **Multidimensional Measure of Sexual Minority Identity**

**Original scale:** Mohr, J., & Fassinger, R. (2000). Measuring dimensions of lesbian and gay male experience. *Measurement and Evaluation in Counseling and Development*, 33(2), 66-66.

Web of science (2006=>): 123 (full database), 32 (health research)

Google scholar (2006=>): 346

#### **Relationship Assessment Scale**

**Original scale:** Hendrick, S. S., Dicke, A., & Hendrick, C. (1998). The relationship assessment scale. *Journal of Social and Personal Relationships*, 15(1), 137-142.

Web of science (2006=>): 124 (full database), 34 (health research)

Google scholar (2006=>): 337

#### **Neosexism Scale**

**Original scale:** Tougas, F., Brown, R., Beaton, A. M., & Joly, S. (1995). Neosexism: Plus ça change, plus c'est pareil. *Personality and Social Psychology Bulletin*, 21(8), 842-849.

Web of science (2006=>): 111 (full database), 1 (health research)

Google scholar (2006=>): 308

#### **Attitudes toward Women Scale**

**Original scale:** Spence, J. T., Helmreich, R., & Stapp, J. (1973). A short version of the Attitudes toward Women Scale (AWS). *Bulletin of the Psychonomic Society*, 2(4), 219-220.

Web of Science (2006->): 104 (full database), 41 (health research)

Google scholar (2006->): 289

#### **Routine and Strategic Relational Maintenance Scale**

Stafford, L., Dainton, M., & Haas, S. (2000). Measuring routine and strategic relational maintenance: Scale revision, sex versus gender roles, and the prediction of relational characteristics. *Communications Monographs*, 67(3), 306-323.

Web of Science (2006->): Missing

Google scholar (2006->): 211

#### **Sex-Role Stereotypes**

**Original scale:** Rosenkrantz, P., Vogel, S., Bee, H., Broverman, I., & Broverman, D. M. (1968). Sex-role stereotypes and self-concepts in college students. *Journal of consulting and clinical psychology*, 32(3), 287.

Web of Science (2006->): 43 (full database),

Google scholar (2006->): 210

#### **Relationship Belief Inventory**

**Original scale:** Eidelson, R. J., & Epstein, N. (1982). Cognition and relationship maladjustment: Development of a measure of dysfunctional relationship beliefs. *Journal of consulting and clinical psychology*, 50(5), 715.

Web of science (2006=>): 46 (full database), 1 (health research)

Google scholar (2006=>): 196

#### **The Romantic Beliefs Scale**

**Original scale:** Sprecher, S., & Metts, S. (1989). Development of the Romantic Beliefs Scale and examination of the effects of gender and gender-role orientation. *Journal of Social and Personal Relationships*, 6(4), 387-411.

Web of science (2006=>): 26 (full database), 2 (health research)

Google scholar (2006=>): 133

#### **Relationship Authenticity**

**Original scale:** Lopez, F. G., & Rice, K. G. (2006). Preliminary development and validation of a measure of relationship authenticity. *Journal of Counseling Psychology*, 53(3), 362.

Web of science (2006=>): 53 (full database), 5 (health research)

Google scholar (2006=>): 123



### **Sex-Role Egalitarianism Scale**

**Original scale:** Beere, C. A., King, D. W., Beere, D. B., & King, L. A. (1984). The Sex-Role Egalitarianism Scale: A measure of attitudes toward equality between the sexes. *Sex Roles, 10*(7-8), 563-576.

Web of science (2006=>): 41 (full database), 5 (health research)

Google scholar (2006=>): 122

### **Quick Discrimination Index**

**Original scale:** Ponterotto, J. G., Burkard, A., Rieger, B. P., Grieger, I., D'Onofrio, A., Dubuisson, A., Heenehan, M., Millstein, B., Parisi, M., Rath, J. F., & Sax, G. (1995). Development and initial validation of the Quick Discrimination Index (QDI). *Educational and Psychological Measurement, 55*, 1026-1031.

Web of science (2006=>): 31 (full database), 2 (health research)

Google scholar (2006=>): 110

### **Attitudes toward Traditional and Egalitarian Sex-Roles**

**Original scale:** Larsen, K. S., & Long, E. (1988). Attitudes toward sex-roles: Traditional or egalitarian?. *Sex Roles, 19*(1-2), 1-12.

Web of science (2006=>): 43 (full database), 2 (health research)

Google scholar (2006=>): 110

### **Mutual Psychological Development Questionnaire**

**Original scale:** Genero, N. P., Miller, J. B., Surrey, J., & Baldwin, L. M. (1992). Measuring perceived mutuality in close relationships: Validation of the Mutual Psychological Development Questionnaire. *Journal of Family Psychology, 6*(1), 36.

Web of science (2006=>): Missing

Google scholar (2006=>): 103

### **Swedish Classical and Modern Sexism Scales**

**Original scale:** Ekehammar, B., Akrami, N., & Araya, T. (2000). Development and validation of Swedish classical and modern sexism scales. *Scandinavian journal of psychology, 41*(4), 307-314.

Web of science (2006=>): 19 (full database), 3 (health research)

Google scholar (2006=>): 65

### **Sex-Role Ideology**

**Original scale:** Kalin, R., & Tilby, P. J. (1978). Development and validation of a sex-role ideology scale. *Psychological reports, 42*(3), 731-738.

Web of Science (2006->): 19 (full database), 2 (health research)

Google scholar (2006->): 59

### **Quality in Relationships Inventory within Couples**

**Original scale:** Pierce, G. R. (1994). The Quality of Relationships Inventory: Assessing the interpersonal context of social support.

Web of science (2006=>): Missing

Google scholar (2006=>): 52

### **Partner Behaviour Inventory**

**Original scale:** Doss, B. D., & Christensen, A. (2006). Acceptance in romantic relationships: the frequency and acceptability of partner behavior inventory. *Psychological Assessment, 18*(3), 289.

Web of science (2006=>): 13 (full database), 4 (health research)

Google scholar (2006=>): 45

### **Managing Affect and Differences Scale**

**Original scale:** Arellano, C. M., & Markman, H. J. (1995). The Managing Affect and Differences Scale (MADS): A self-report measure assessing conflict management in couples. *Journal of Family Psychology*, 9(3), 319

Web of science (2006=>): 8 (full database)

Google scholar (2006=>): 33

#### **Women as Managers Scale**

**Original scale:** Peters, L. H., Terborg, J. R., & Taynor, J. (1974). Women as Managers Scale:(WAMS): a Measure of Attitudes Toward Women in Management Positions. Journal Supplement Abstract Service of the American Psychological Association.

Web of science (2006=>): Missing

Google scholar (2006=>): 54

#### **Gender Role Egalitarian Attitudes**

**Original Scale:** Chang, L. (1999). Gender role egalitarian attitudes in Beijing, Hong Kong, Florida, and Michigan. *Journal of Cross-Cultural Psychology*, 30(6), 722-741.

Web of Science (2006->): 22 (full database) 1 (health)

Google scholar (2006->): 54

#### **Adherence to Extreme Gender Role Beliefs**

**Original scale:** Hamburger, M. E., Hogben, M., McGowan, S., & Dawson, L. J. (1996). Assessing Hypergender Ideologies: Development and Initial Validation of a Gender-Neutral Measure of Adherence to Extreme Gender-Role Beliefs. *Journal of Research in Personality*, 30(2), 157-178.

Web of Science (2006->): 23 (full database) 3 (health)

Google scholar (2006->): 45

#### **Gender Attitude Inventory**

**Original scale:** Ashmore, R. D., Del Boca, F. K., & Bilder, S. M. (1995). Construction and validation of the Gender Attitude Inventory, a structured inventory to assess multiple dimensions of gender attitudes. *Sex roles*, 32(11-12), 753-785.

Web of Science (2006->): 15 (full database)

Google scholar (2006->): 45

#### **Sex-Role Orientation**

**Original scale:** Brogan, D., & Kutner, N. G. (1976). Measuring sex-role orientation: A normative approach. *Journal of Marriage and the Family*, 31-40.

Web of science (2006=>): 12 (full database) 4 (health)

Google scholar (2006=>): 44

#### **Gender ideology as an identity**

**Original scale:** Kroska, A. (2000). Conceptualizing and measuring gender ideology as an identity. *Gender & Society*, 14(3), 368-394.

Web of Science (2006->): 12 (full database) 2 (health)

Google scholar (2006->): 36

#### **Gender Role Beliefs Scale**

**Original scale:** Kerr, P. S., & Holden, R. R. (1996). Development of the gender role beliefs scale (GRBS). *Journal of Social Behavior and Personality*, 11(5), 3.

Web of Science (2006->): 9 (full database)

Google scholar (2006->): 34

#### **Male Attitude Norms Inventory II**

**Original scale:** Luyt, R. (2005). The Male Attitude Norms Inventory-II A Measure of Masculinity Ideology in South Africa. *Men and Masculinities*, 8(2), 208-229.

Web of science (2006=>): Missing

Google scholar (2006=>): 36

### **Sexist Attitudes toward Women**

**Original scale:** Benson, P. L., Institute, S., & Vincent, S. (1980). Development and validation of the sexist attitudes toward women scale (SATWS). *Psychology of Women Quarterly*, 5(2), 276-291.  
Web of science (2006=>): 8 (full database), 4 (health)  
Google scholar (2006=>): 31

### **Race and Gender-Specific Stress Measure for African-American Women**

**Original scale:** Jackson, F. M. (2005). The Development of a Race and Gender-Specific Stress Measure for African- American Women: Jackson, Hogue, Phillips Contextualized Stress Measure. *Ethnicity & disease*, 15(4), 594-600.  
Web of science (2006=>): 16 (full database), 10 (health research)  
Google scholar (2006=>): 26

### **Egalitarian Sex Role Attitudes**

Suzuki, A. (1991). Egalitarian sex role attitudes: Scale development and comparison of American and Japanese women. *Sex Roles*, 24(5-6), 245-259.  
Web of science (2006=>): 15 (full database), 4 (health research)  
Google scholar (2006=>): 26

### **Schedule of Sexist Events**

**Original scale:** Yoder, J. D., & McDonald, T. W. (1998). Measuring sexist discrimination in the workplace: Support for the validity of the schedule of sexist events. *Psychology of Women Quarterly*, 22, 487-491.  
Google scholar (2006=>): 22  
Web of Science (2006=>): 8 (full database) 1 (health research)

### **German Relationship Assessment Scale**

**Original scale:** Dinkel, A., & Balck, F. (2005). An evaluation of the German relationship assessment scale. *Swiss Journal of Psychology*, 64(4), 259-263.  
Web of science (2006=>): 6 (full database), 1 (health research)  
Google scholar (2006=>): 22

### **Concord-Index (measure of family relationships)**

**Original scale:** Lee, P. H., Stewart, S. M., Lun, V., Bond, M. H., Yu, X., & Lam, T. H. (2012). Validating the concord index as a measure of family relationships in China. *Journal of Family Psychology*, 26(6), 906.  
Too new for citations

### **Conflict Disengagement Inventory (CDI)**

**Original scale:** Sanford, K. (2014). A latent change score model of conflict resolution in couples Are negative behaviors bad, benign, or beneficial?. *Journal of Social and Personal Relationships*, 0265407513518156.  
Too new for citations

### **Gender Minority Stress and Resilience**

**Original scale:** Testa, R. J., Habarth, J., Peta, J., Balsam, K., & Bockting, W. (2015). Development of the Gender Minority Stress and Resilience Measure. *Psychology of Sexual Orientation and Gender Diversity*, 2(1), 65.  
Too new for citations

### **Gender-Based Attitudes Toward Marriage and Child Rearing**

**Original scale:** Adams, M., Coltrane, S., & Parke, R. D. (2007). Cross-ethnic applicability of the gender-based attitudes toward marriage and child rearing scales. *Sex roles*, 56(5-6), 325-339.  
Too new for citations

### **Patriarchal Beliefs Scale**

**Original scale:** Yoon, E., Adams, K., Hogge, I., Bruner, J. P., Surya, S., & Bryant, F. B. (2015). Development and validation of the Patriarchal Beliefs Scale. *Journal of counseling psychology*, 62(2), 264.

Too new for citations

### **African American Men's Gendered Racism Stress Inventory**

**Original scale:** Schwing, A. E., Wong, Y. J., & Fann, M. D. (2013). Development and validation of the African American Men's Gendered Racism Stress Inventory. *Psychology of Men & Masculinity*, 14(1), 16.

Too new for citations

## **Ineligible Scales (N=57)**

### **NEO Personality Inventory (broader scale)**

**Original scale:** Costa, P. T., & McCrae, R. R. (1985). *The NEO personality inventory: Manual, form S and form R*. Psychological Assessment Resources.

Web of Science (2006->): Missing

Google scholar (2006->): 2200

**Justification:** Doesn't measure gender.

### **Conformity to Traditional Masculinity and Relationship Satisfaction**

**Original scale:** Burn, S. M., & Ward, A. Z. (2005). Men's Conformity to Traditional Masculinity and Relationship Satisfaction. *Psychology of Men & Masculinity*, 6(4), 254.

Web of Science (2006->): Missing

Google scholar (2006->): 99

**Justification:** Its traits and dimensions are based on the Conformity to Masculine Norms scale. This scale is already included.

### **Gender Diagnosticity**

**Original scale:** Lippa, R., & Connelly, S. (1990). Gender diagnosticity: A new Bayesian approach to gender-related individual differences. *Journal of Personality and Social Psychology*, 59(5), 1051.

Web of Science (2006->): 44 (full database), 5 (health research)

Google scholar (2006->): 61

**Justification:** Measure used to predict not measure gender

### **Gender Differences in Sexual Attitudes**

**Original scale:** Hendrick, S., Hendrick, C., Slapion-Foote, M. J., & Foote, F. H. (1985). Gender differences in sexual attitudes. *Journal of Personality and Social Psychology*, 48(6), 1630.

Web of Science (2006->): 21 (full database), 9 (health research)

Google scholar (2006->): 61

**Justification:** Focuses on sexuality, not gender.

### **Masculine Gender Identity In females**

**Original scale:** Blanchard, R., & Freund, K. (1983). Measuring masculine gender identity in females. *Journal of Consulting and Clinical Psychology*, 51(2), 205.

Web of Science (2006->): 9 (full database) 5 (health)

Google scholar (2006->): 21

**Justification:** Specifically designed to measure transgender behavior. Items (behaviors and sentiments) do not capture gender related traits and characteristics.

### **Male Assessment of Self-Objectification**

**Original scale:** Daniel, S., Bridges, S. K., & Martens, M. P. (2014). The development and validation of the Male Assessment of Self-Objectification (MASO). *Psychology of Men & Masculinity*, 15(1), 78.

Too new for citations

**Justification:** Measures Body-related aspects of gender (not deemed relevant for our measure)

#### **Masculine Body Ideal Distress Scale**

**Original scale:** Kimmel, S. B., & Mahalik, J. R. (2004). Measuring masculine body ideal distress: Development of a measure. *International Journal of Men's Health*, 3(1), 1.

Too new for citations

**Justification:** Measures Body-related aspects of gender (not deemed relevant for our measure)

#### **Subjective Masculinity stress**

**Original scale:** Wong, Y. J., Shea, M., Hickman, S. J., LaFollette, J. R., Cruz, N., & Boghokian, T. (2013). The Subjective Masculinity Stress Scale: Scale development and psychometric properties. *Psychology of Men & Masculinity*, 14(2), 148.

Too new for citations

**Justification:** Does not rely on predefined gender characteristics and traits. Respondents define their own "gender stressors" and hereafter rate them.

#### **Men's Perceived Inexpressiveness Norms**

**Original scale:** Wong, Y. J., Horn, A. J., Gomory, A. M., & Ramos, E. (2013). Measure of Men's Perceived Inexpressiveness Norms (M2PIN): Scale development and psychometric properties. *Psychology of Men & Masculinity*, 14(3), 288.

Too new for citations

**Justification:** Measures expressivity in men, not gender.

#### **Reference Group Identity Dependence Scale**

**Original scale:** Wade, J. C., & Gelso, C. J. (1998). Reference Group Identity Dependence Scale A Measure of Male Identity. *The Counseling Psychologist*, 26(3), 384-412.

Web of Science (2006->): 11 (full database), 1 (health research)

Google scholar (2006->): 28

**Justification:** Does not address gender traits and characteristics

#### **A Gender-Based Measurement Invariance Study of the Sociocultural Attitudes toward Appearance Questionnaire**

**Original scale:** Wheeler, D. L., Vassar, M., & Hale, W. D. (2011). A gender-based measurement invariance study of the Sociocultural Attitudes Toward Appearance Questionnaire-3. *Body image*, 8(2), 168-172.

Too new for citations

**Justification:** Measures Body-related aspects of gender (not deemed relevant for our measure)

#### **LGBT Ally Identity Measure**

**Original scale:** Jones, K. N., Brewster, M. E., & Jones, J. A. (2014). The creation and validation of the LGBT Ally Identity Measure. *Psychology of Sexual Orientation and Gender Diversity*, 1(2), 181.

Too new for citations

**Justification:** Does not measure gender

#### **O' Kelly Women's Belief Scale**

**Original scale:** O'Kelly, M. (2011). Psychometric properties of the O'Kelly women's belief scales. *Journal of Rational-Emotive & Cognitive-Behavior Therapy*, 29(3), 145-157.

Too new for citations

**Justification:** Does not address gender traits and characteristics

#### **Lesbian and Gay Identity Scale**

**Original scale:** Mohr, J., & Fassinger, R. (2000). Measuring dimensions of lesbian and gay male experience. *Measurement and Evaluation in Counseling and Development*, 33(2), 66-66.

Too new for citations

**Justification:** Doesn't measure gender

**Wiggins Interpersonal Behavior Circle**

**Original scale:** Wiggins, J. S. (1979). A psychological taxonomy of trait-descriptive terms: The interpersonal domain. *Journal of personality and social psychology*, 37(3), 395.

Too new for citations

**Justification:** Doesn't measure gender

**Social Sex-Role Inventory (DSI)**

**Original scale:** Shively, M. G., & De Cecco, J. P. (1977). Components of sexual identity. *Journal of homosexuality*, 3(1), 41-48.

Web of Science (2006->): 23 (full database), 7 (health research)

Google scholar (2006->): 142

**Justification:** Doesn't measure gender

**Masculine Gender Role Discrepancy**

**Original scale:** Pleck, J. H. (1995). The gender role strain paradigm: An update.

Web of Science (2006->): Missing

Google scholar (2006->): 590

**Justification:** This is a theory, not a scale

**Omnibus Personality Inventory**

**Original scale:** Heist, P., & Yonge, G. D. (1968). *Omnibus personality inventory*. Psychological Corporation.

**Justification:** Fewer than 20 citations since 2006

**Women's Role Strain Inventory**

**Original scale:** Lengacher, C. A. (1993). Development of a predictive model for role strain in registered nurses returning to school. *The Journal of nursing education*, 32(7), 301-308.

**Justification:** Fewer than 20 citations since 2006

**Australian Sex-Role Scale**

**Original scale:** Antill, J. K., Cunningham, J. D., Russell, G., & Thompson, N. L. (1981). An Australian sex-role scale. *Australian Journal of Psychology*, 33(2), 169-183.

**Justification:** Fewer than 20 citations since 2006

**Home Career Conflict Measure**

**Original scale:** Farmer, H. S. (1984). Development of a measure of home-career conflict related to career motivation in college women. *Sex Roles*, 10(9-10), 663-675.

**Justification:** Fewer than 20 citations since 2006

**Sex-Role Blending**

**Original scale:** Heilbrun, A. B. (1981). Gender differences in the functional linkage between androgyny, social cognition, and competence. *Journal of Personality and Social psychology*, 41(6), 1106.

**Justification:** Fewer than 20 citations since 2006

**Chinese Gender Role Stress**

**Original scale:** Tang, C. S. K., & Lau, B. H. B. (1995). The assessment of gender role stress for Chinese. *Sex Roles*, 33(7-8), 587-595.

**Justification:** Fewer than 20 citations since 2006

**Feminine Gender Identity Scale**

**Original scale:** Freund, K., Nagler, E., Langevin, R., Zajac, A., & Steiner, B. (1974). Measuring feminine gender identity in homosexual males. *Archives of Sexual Behavior*, 3(3), 249-260.

**Justification:** Fewer than 20 citations since 2006

**Self and Peer-Related Scale of Female and Male Roles and Attributes**

**Original scale:** Chang, L., & McBride-Chang, C. (1997). Self-and peer-ratings of female and male roles and attributes. *The Journal of social psychology, 137*(4), 527-529.

**Justification:** Fewer than 20 citations since 2006

**Behavioral Self-Report of Femininity**

**Original scale:** Greene, K. S., & Gynther, M. D. (1994). Another femininity scale? *Psychological reports, 75*(1), 163-170.

**Justification:** Fewer than 20 citations since 2006

**The Femininity Study**

**Original scale:** Thorne, F. C. (1977). The measurement of femininity. *Journal of clinical psychology, 33*(S1), 5-10.

**Justification:** Fewer than 20 citations since 2006

**Undesirable Characteristics Scale**

**Original scale:** Socially-undesirable sex-correlated characteristics: implications for androgyny and adjustment. *Journal of Consulting and Clinical Psychology, 45*, 1185-1186.

**Justification:** Fewer than 20 citations since 2006

**Measure of Adult Stereotypic Sex-Role Concepts of Masculinity**

**Original scale:** Newman, R. C. (1976). Development and Standardization of Measures of Stereotypic Sex-Role Concepts and of Sex-Role Adoption in Adults. *Psychological reports, 39*(2), 623-630.

**Justification:** Fewer than 20 citations since 2006

**Michigan Gender Identity Test (MIGIT)**

**Original scale:** Dull, C. Y., Catford, J. C., Guiora, A. Z., Beit-Hallahmi, B., Paluszny, M., & Cooley, R. E. (1975). The Michigan gender identity test (MIGIT). *Comprehensive psychiatry, 16*(6), 581-592.

**Justification:** Fewer than 20 citations since 2006

**Sex Rep**

**Original scale:** Baldwin, A. C., Critelli, J. W., Stevens, L. C., & Russell, S. (1986). Androgyny and sex role measurement: A personal construct approach. *Journal of Personality and Social Psychology, 51*(5), 1081.

**Justification:** Fewer than 20 citations since 2006

**Attitudes toward Masculinity Transcendence Scale**

**Original scale:** Moreland, J., & Van Tuinen, M. (1978). The attitude toward masculinity transcendence scale. *Unpublished manuscript, Southern Illinois University at Carbondale.*

**Justification:** Fewer than 20 citations since 2006

**Scales for Investigation of the Dual-Career Family**

**Original scale:** Pendleton, B. F., Poloma, M. M., & Garland, T. N. (1980). Scales for investigation of the dual-career family. *Journal of Marriage and the Family, 269*-276.

**Justification:** Fewer than 20 citations since 2006

**Sex-Role Antecedents Scale**

**Original scale:** Mast, D. L., & Herron, W. G. (1986). The sex-role antecedents scales. *Perceptual and Motor Skills, 63*(1), 27-56.

**Justification:** Fewer than 20 citations since 2006

**Multi-dimensional Sex-role Inventory**

**Original scale:** Bernard, L. C., & Wood, J. (1990). Further observations on the multidimensional aspects of masculinity-femininity: The multidimensional sex role inventory-revised. *Journal of Social Behavior and Personality*, 5(4), 205.

**Justification:** Fewer than 20 citations since 2006

#### **Masculine role inventory**

**Original scale:** Snell Jr, W. E. (1986). The masculine role inventory: Components and correlates. *Sex Roles*, 15(7-8), 443-455.

**Justification:** Fewer than 20 citations since 2006

#### **Multifaceted Gender identity questionnaire**

**Original scale:** Willemsen, T. M., & Fischer, A. H. (1999). Assessing multiple facets of gender identity: The Gender Identity Questionnaire. *Psychological Reports*, 84(2), 561-562.

**Justification:** Fewer than 20 citations since 2006

#### **Masculine Behavior**

**Original scale:** Snell Jr, W. E. (1989). Development and validation of the Masculine Behavior Scale: A measure of behaviors stereotypically attributed to males vs. females. *Sex Roles*, 21(11-12), 749-767.

**Justification:** Fewer than 20 citations since 2006

#### **Masculine and Feminine Self-Disclosure Scale**

**Original scale:** Snell Jr, W. E., Belk, S. S., & Hawkins II, R. C. (1986). The Masculine and Feminine Self-Disclosure Scale: The politics of masculine and feminine self-presentation. *Sex Roles*, 15(5-6), 249-267.

**Justification:** Fewer than 20 citations since 2006

#### **Male female relations questionnaire**

**Original scale:** Sherman, P. J., & Spence, J. T. (1997). A COMPARISON OF TWO COHORTS OF COLLEGE STUDENTS IN RESPONSES TO THE MALE-FEMALE RELATIONS QUESTIONNAIRE. *Psychology of Women Quarterly*, 21(2), 265-278.

**Justification:** Fewer than 20 citations since 2006

#### **Machismo**

**Original scale:** Villemez, W. J., & Touhey, J. C. (1977). A measure of individual differences in sex stereotyping and sex discrimination: The "Macho" scale. *Psychological Reports*, 41(2), 411-415.

**Justification:** Fewer than 20 citations since 2006

#### **Feminine Gender Identity Scale**

**Original scale:** Willemsen, T. M., & Fischer, A. H. (1999). Assessing multiple facets of gender identity: The Gender Identity Questionnaire. *Psychological Reports*, 84(2), 561-562.

**Justification:** Fewer than 20 citations since 2006

#### **Womanist identity attitude scale**

**Original scale:** Moradi, B., Yoder, J. D., & Berendsen, L. L. (2004). An evaluation of the psychometric properties of the womanist identity attitudes scale. *Sex Roles*, 50(3-4), 253-266.

**Justification:** Fewer than 20 citations since 2006

#### **Assessing the Dynamics of Gender in Couples and Families (Gendergram)**

**Original scale:** White, M. B., & Tyson-Rawson, K. J. (1995). Assessing the dynamics of gender in couples and families: The gendergram. *Family Relations*, 253-260.

**Justification:** Fewer than 20 citations since 2006

#### **Attitudes toward Multiple Role Planning**



**Original scale:** Weitzman, L. M., & Fitzgerald, L. F. (1996). The development and initial validation of scales to assess attitudes toward multiple role planning. *Journal of Career Assessment*, 4(3), 269-284.

**Justification:** Fewer than 20 citations since 2006

#### **Traditional vs. Egalitarian Roles in Marriages**

**Original scale:** Altrocchi, J., & Crosby, R. D. (1989). Clarifying and measuring the concept of traditional vs. egalitarian roles in marriages. *Sex roles*, 20(11-12), 639-648.

**Justification:** Fewer than 20 citations since 2006

#### **Women in Society Questionnaire**

**Original scale:** Walker, L. (1994). Attitudes to minorities: Survey evidence of Western Australians' attitudes to Aborigines, Asians, and women. *Australian Journal of Psychology*, 46(3), 137-143

**Justification:** Fewer than 20 citations since 2006

#### **Attitudes to females' social roles**

**Original scale:** Slade, P., & Jenner, F. A. (1978). Questionnaire measuring attitudes to females' social roles. *Psychological Reports*, 43(2), 351-354.

**Justification:** Fewer than 20 citations since 2006

#### **Maferri Inventory of Feminine Values**

**Original scale:** Steinmann, A. G. (1979). Maferri Inventory of Feminine Values: Specimen Set (and Manual Series for the Interpretation of the Maferri Inventory of Feminine Values (MIFV).

**Justification:** Fewer than 20 citations since 2006

#### **Tridimensional Sexism Scale**

**Original scale:** Rombough, S., & Ventimiglia, J. C. (1981). Sexism: A tri-dimensional phenomenon. *Sex Roles*, 7(7), 747-755.

**Justification:** Fewer than 20 citations since 2006

#### **Sex Role Questionnaire**

**Original scale:** Jean, P. J., & Reynolds, C. R. (1980). Development of the Bias in Attitudes Survey: A sex-role questionnaire. *Journal of Psychology*, 104(2), 269.

**Justification:** Fewer than 20 citations since 2006

#### **Traditional and Liberated Males' Attitudes**

**Original scale:** Fiebert, M. S. (1983). Measuring traditional and liberated males' attitudes. Perceptual and motor skills.

**Justification:** Fewer than 20 citations since 2006

#### **Superficiality and the Dimensionality of Sexism**

**Original scale:** Korth, B. (1978). Superficiality and the Dimensionality of Sexism. *Applied Psychological Measurement*, 2(1), 51-61.

**Justification:** Fewer than 20 citations since 2006

#### **The Traditional-Liberated Content Scale**

**Original scale:** Fiebert, M. S., & Vera, W. (1985). Test-retest reliability of a male sex-role attitude survey: The traditional-liberated content scale. *Perceptual and motor skills*, 60(1).

**Justification:** Fewer than 20 citations since 2006

#### **Multidimensional Aversion to Women who Work Scale**

**Original scale:** Valentine, S. (2001). Development of a brief multidimensional aversion to women who work scale. *Sex Roles*, 44(11-12), 773-787.

**Justification:** Fewer than 20 citations since 2006

#### **Wellesley Role Orientation Scale**

**Original scale:** Alper, T. G. (1973). The relationship between role orientation and achievement motivation in college women. *Journal of Personality*.

**Justification:** Fewer than 20 citations since 2006

#### **Sex Role Behavior Scale**

**Original scale:** Orlofsky, J. L., Ramsden, M. W., & Cohen, R. S. (1982). Development of the revised sex-role behavior scale. *Journal of Personality Assessment*, 46, 632–638.

**Justification:** Fewer than 20 citations since 2006

### **Step 4: Developing a core list of gender variables**

This section describes how we identified the core gender variables for each of the three categories gender-related traits, gender norms and gender relations.

#### **Identifying core variables for gender norms**

Through the literature search, we identified three eligible measures pertaining to the gender norms category. The first two measures (see below) concern child-rearing and co-parenting behavior. These aspects will be captured with a slightly broader variable focusing on various forms of caregiving. We hereby extend the restricted focus on “nuclear” family formations proposed by existing measures. The third measure focuses on dual-career wives’ orientation towards domestic labor. We also intend to capture this aspect with a broader variable focusing on time-use for both women and men. An additional variable focusing work-related physical and psychological strain will also be included under this category.

#### Caregiving

- Parental Child-rearing Behavior Scale
- Co-parenting and family rating system

#### Time-use

- The orientation towards domestic labor

#### **Identifying core variables for gender-related traits**

In developing our final list of gender-related traits, we began by harvesting all relevant characteristics and traits covered by the 31 eligible gender-related traits scales identified in Step 3. Next, we aggregated similar and closely related gender traits and characteristics into 17 clusters, each capturing distinct aspects of an individual’s gender identity, using inductive coding categories. Numerous cluster-solutions (i.e. solutions varying on the total number of clusters since characteristics and traits can be merged or split into smaller or larger clusters) were scrutinized as part of this step. Consensus was ultimately established on the 17-cluster solution as the most intuitively meaningful and feasible way of structuring the many traits and characteristics into key gender-related traits variables for health research (Table S3). We then ranked the clusters based on occurrences (i.e. number of characteristics and traits pertaining to each cluster) to obtain a closer understanding of their prevalence across existing scales. All in all, this strategy helped us make sense of the literature and carve out a condensed list of core gender-related traits variables. Specifically, we selected the four most prevalent clusters emerging from our coding. Risk-taking is not

among the “top-scorers,” but has been included as a fifth variable given its well-documented links to health outcomes.

1. Emotionality and expressiveness (37 occurrences) (Captured by *Expressive*)
2. Empathy, caring and nurturing (37 occurrences) (Captured by *Empathetic/caring/nurturing*)
3. Self-reliance and independence (18 occurrences) (Captured by *Self-reliant/independent*)
4. Striving for status, competitiveness (17 occurrences) (Captured by *Competitive/striving*)
5. Risk-taking (5 occurrences) (Captured by *Sensation-seeking/risk-taking*)

### **Identifying core variables for gender relations**

The literature search resulted in 40 scales pertaining to the gender relations category. Specifically, these scales capture two core variables for gender relations: equality in family relationships and discrimination. An additional variable focusing more broadly on social support will also be included under this category.

#### Gender discrimination

- Gender Minority Stress and Resilience
- Multidimensional Measure of Sexual Minority Identity
- The Ambivalent Sexism Inventory
- Race and Gender-Specific Stress Measure for African-American Women
- Schedule of Sexist Events
- African American Men’s Gendered Racism Stress Inventory

#### Sexism and attitudes

- Patriarchal Beliefs Scale
- Modern and Old-Fashioned Sexism
- Sex-Role Ideology
- Gender Ideology as an Identity
- Gender Attitude Inventory
- Quick Discrimination Index
- Sex-Role Stereotypes
- Attitudes toward Traditional and Egalitarian Sex-Roles
- Women as Managers Scale
- Neosexism Scale
- Swedish Classical and Modern Sexism Scale
- Sexist Attitudes toward Women
- Sex-Role Egalitarianism Scale
- Attitudes toward Women Scale
- Gender Role Egalitarian Attitudes Scale
- Adherence to Extreme Gender Role Beliefs
- Sex-Role Orientation
- Gender Role Beliefs Scale
- Male Attitude Norms Inventory II
- Egalitarian Sex Role Attitudes

#### Equality in family relationships

- Dyadic Adjustment Scale across Gender
- Quality in Relationships Inventory within Couples
- Conflict Disengagement Inventory (CDI)
- German Relationship Assessment Scale (\*Same as Relationship Assessment Scale)
- Partner Behavior Inventory
- Relationship Assessment Scale
- Relationship Belief Inventory
- Managing Affect and Differences Scale
- Concord-Index (measure of family relationships)
- Mutual Psychological Development Questionnaire (measuring perceived mutuality in close relationships)
- Relationship Authenticity (Authenticity in Relationships Scale)
- The Romantic Beliefs Scale
- Routine and Strategic Relational Maintenance Scale
- Gender-Based Attitudes Toward Marriage and Child Rearing

### **Step 5: Identifying measures for each gender variable**

This section documents the search strategy used to identify additional construct specific measures of relevance to our gender variables. We for searched for meta-analyses in PsycINFO and PubMed and restricted the time-span to the period 2006 through 2015.

**Search limitations.** We used the following database-specific search limitations:

PsycINFO: Age-group: Adulthood (18 years or older); Record type: Peer-reviewed journal, Abstract collection, Peer-reviewed articles; Methodology: Meta-Analysis, Metasynthesis, systematic review; Language: English; Population: Human; PsycINFO Classifiers: “Tests and testing”; “Personality Scales & Inventories”; “Clinical Psychological Testing”; “Health Psychology Testing”; “Educational measurement”; “Occupational and employment testing”; “Consumer opinion and attitudes”.

PUBMED: Ages: all ages; Species: Humans; Language: English; Article types: all.

**Search strings.** The search terms used in this part of the literature search are listed in Table S4.

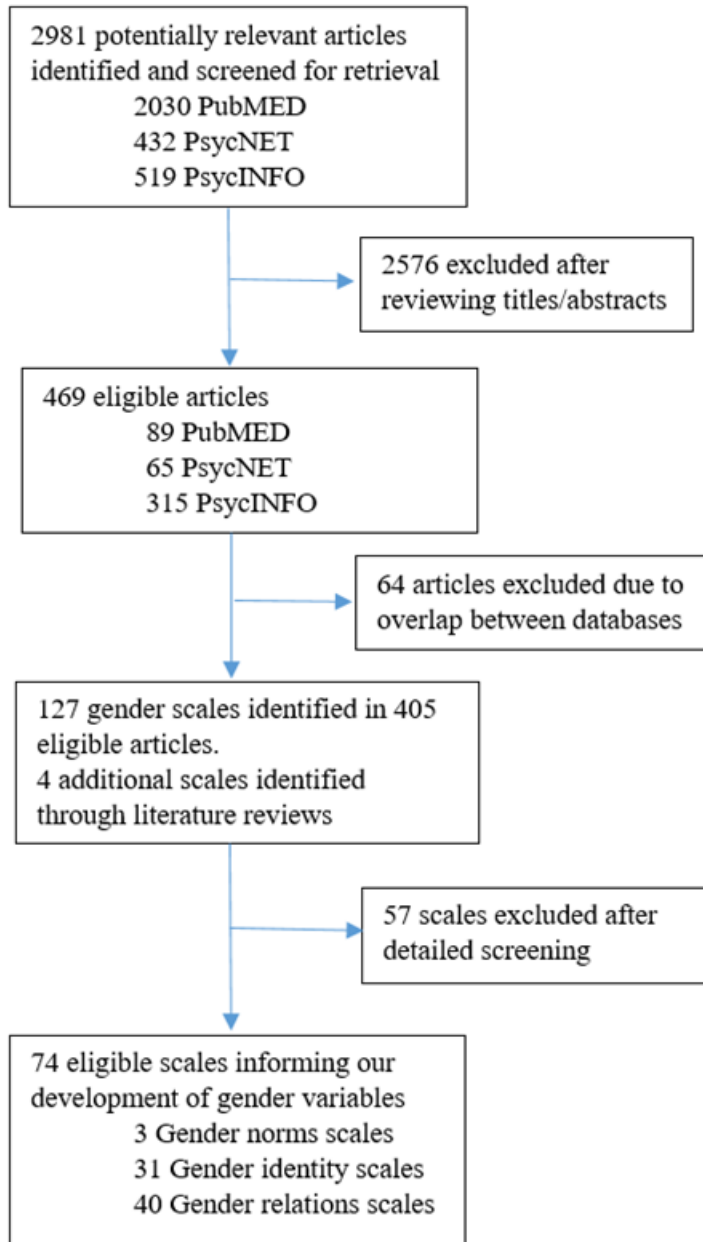

**Fig. S1.** Flowchart of article inclusion and exclusion in the literature search.

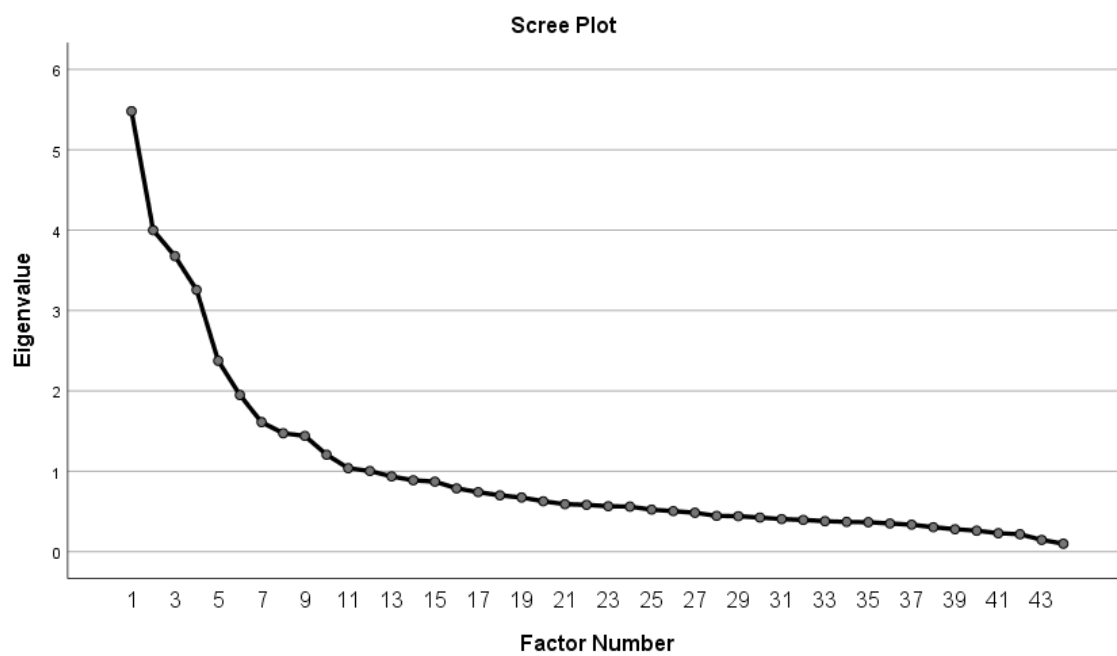

**Fig. S2.** Screeplot of the factor analysis reported in Table S8.

**Table S1.** Item phrasing and descriptive statistics for the 44 potentially relevant gender-related items.

| Items                                                                                                                                                       | Item name   | Min | Max | SAMPLE 1 |      |      |        |     | SAMPLE 2 |       |      |        |     | SAMPLE 3 |      |      |        |     |
|-------------------------------------------------------------------------------------------------------------------------------------------------------------|-------------|-----|-----|----------|------|------|--------|-----|----------|-------|------|--------|-----|----------|------|------|--------|-----|
|                                                                                                                                                             |             |     |     | N        | Mean | S.D. | Median | IQR | N        | Mean  | S.D. | Median | IQR | N        | Mean | S.D. | Median | IQR |
| <i>Gender Norms</i>                                                                                                                                         |             |     |     |          |      |      |        |     |          |       |      |        |     |          |      |      |        |     |
| In the past year, how often did you feel emotionally exhausted because of your caretaking responsibilities?                                                 | careemot*   | 1   | 5   | 2032     | 1.59 | 1.07 | 1      | 1   | 2062     | 1.60  | 1.04 | 1      | 1   | 462      | 1.57 | 1.02 | 1      | 1   |
| In the past year, how often did you feel physically exhausted because of your caretaking responsibilities?                                                  | carephys*   | 1   | 5   | 2032     | 1.58 | 1.05 | 1      | 1   | 2062     | 1.58  | 1.03 | 1      | 1   | 462      | 1.53 | .97  | 1      | 1   |
| In the past year, how often have your caretaking responsibilities caused you to worry about the future?                                                     | carefut*    | 1   | 5   | 2032     | 1.67 | 1.21 | 1      | 1   | 2062     | 1.67  | 1.17 | 1      | 1   | 462      | 1.64 | 1.16 | 1      | 1   |
| On average, how many hours per weekday do you spend on the following: Sleep                                                                                 | timesleep   | 1   | 24  | 2017     | 6.88 | 2.26 | 7      | 2   | 2068     | 6.86  | 2.17 | 7      | 2   | 457      | 6.80 | 3.06 | 7      | 2   |
| On average, how many hours per weekday do you spend on the following: Work (paid work, studying, internships, etc.)                                         | timework    | 1   | 24  | 2017     | 6.74 | 3.35 | 8      | 4   | 2069     | 7.13  | 3.35 | 8      | 4   | 457      | 5.96 | 4.58 | 8      | 9   |
| On average, how many hours per weekday do you spend on the following: Household Chores (yard work, food shopping, cooking, cleaning up, repairs, etc.)      | timehouse   | 1   | 24  | 2019     | 2.07 | 1.66 | 2      | 1.5 | 2070     | 2.22  | 1.62 | 2      | 2   | 457      | 2.6  | 2.5  | 2      | 2   |
| On average, how many hours per weekday do you spend on the following: Leisure (free time activities, relaxing, chatting, entertainment, etc.)               | timeleisure | 1   | 4   | 2018     | 4.31 | 3.23 | 4      | 4   | 2069     | 3.85  | 2.99 | 3      | 3   | 456      | 3.75 | 2.99 | 3      | 3   |
| On average, how many hours per weekday do you spend on the following: Exercise (walking or biking to and from work, going to the gym, playing sports, etc.) | timeexc     | 1   | 24  | 2017     | 0.97 | 1.26 | 1      | 1   | 2066     | 0.925 | 1.26 | 1      | 1   | 456      | 1.23 | 1.18 | 1      | 1.5 |
| On average, how many hours per weekday do you spend on the following: Taking care of                                                                        | timecare    | 1   | 24  | 2014     | 1.68 | 2.80 | 0      | 2   | 2068     | 1.813 | 2.64 | 0.25   | 3   | 457      | 1.86 | 3.46 | 0      | 2.5 |

someone in need (caring for children, elders, partners in need, etc.)

|                                                                                                      |            |   |    |      |      |      |   |   |      |      |       |   |   |     |      |      |   |   |  |
|------------------------------------------------------------------------------------------------------|------------|---|----|------|------|------|---|---|------|------|-------|---|---|-----|------|------|---|---|--|
| On average, how many hours per weekday do you spend on the following: Commuting                      | timecom    | 1 | 24 | 2016 | 0.87 | 1.06 | 1 | 1 | 2065 | 0.86 | 1.01  | 1 | 1 | 457 | 1.05 | 1.55 | 1 | 2 |  |
| How often does your job require working fast?                                                        | workspeed* | 1 | 5  | 2027 | 2.79 | 1.36 | 3 | 3 | 2062 | 2.81 | 1.34  | 3 | 3 | 455 | 2.42 | 1.42 | 2 | 3 |  |
| How often does your job involve repetitive tasks?                                                    | workrep*   | 1 | 5  | 2027 | 2.83 | 1.39 | 3 | 3 | 2062 | 2.83 | 1.34  | 3 | 3 | 455 | 2.24 | 1.3  | 2 | 2 |  |
| How often do you feel emotionally exhausted from your work activities?                               | workemot*  | 1 | 5  | 2027 | 2.29 | 1.20 | 2 | 2 | 2062 | 2.26 | 1.14  | 2 | 2 | 455 | 2.05 | 1.19 | 2 | 2 |  |
| How often do you feel physically exhausted from your work activities?                                | workphys*  | 1 | 5  | 2027 | 2.18 | 1.18 | 2 | 2 | 2062 | 2.13 | 1.13  | 2 | 2 | 455 | 1.89 | 1.14 | 1 | 2 |  |
| How often does your job involve risk of harm or injury?                                              | workrisk*  | 1 | 5  | 2027 | 1.47 | 0.85 | 1 | 1 | 2062 | 1.52 | 0.93  | 1 | 1 | 455 | 1.4  | .82  | 1 | 1 |  |
| How often does your job involve hazards, such as smoke, heat, noise, or chemicals?                   | workhaz*   | 1 | 5  | 2027 | 1.44 | 0.91 | 1 | 0 | 2062 | 1.48 | 0.96  | 1 | 1 | 455 | 1.37 | .88  | 1 | 0 |  |
| <b>Gender-related traits</b>                                                                         |            |   |    |      |      |      |   |   |      |      |       |   |   |     |      |      |   |   |  |
| How often do you find yourself competing with others in situations that do not call for competition? | compdom    | 1 | 5  | 2043 | 2.47 | 0.91 | 2 | 1 | 2101 | 2.42 | 0.88  | 2 | 1 | 463 | 2.37 | .89  | 2 | 1 |  |
| How competitive are you compared to others?                                                          | compgen    | 1 | 5  | 2042 | 2.95 | 1.13 | 3 | 2 | 2100 | 2.96 | 1.13  | 3 | 2 | 471 | 3.10 | 1.18 | 3 | 2 |  |
| In general, how prepared are you to take risks?                                                      | riskgen    | 1 | 5  | 2039 | 2.75 | 0.94 | 3 | 1 | 2095 | 2.75 | 0.91  | 3 | 1 | 467 | 2.99 | .930 | 3 | 2 |  |
| How prepared are you to take risks when making financial decisions?                                  | riskfinan  | 1 | 5  | 2039 | 2.65 | 1.12 | 3 | 1 | 2095 | 2.70 | 1.10  | 3 | 1 | 467 | 2.76 | 1.09 | 3 | 2 |  |
| How prepared are you to take risks when it comes to recreational activities?                         | riskrecrea | 1 | 5  | 2039 | 3.05 | 1.11 | 3 | 2 | 2095 | 2.98 | 1.11  | 3 | 2 | 467 | 3.11 | 1.09 | 3 | 2 |  |
| How important is it for you to be independent?                                                       | indepgen   | 1 | 5  | 2037 | 4.05 | 0.92 | 4 | 1 | 2094 | 4.16 | 0.86  | 4 | 1 | 467 | 4.18 | .824 | 4 | 1 |  |
| When you are in need, how often do you turn to others for help?                                      | Indephelph | 1 | 5  | 2037 | 3.29 | 0.83 | 3 | 1 | 2094 | 3.42 | 0.78  | 3 | 1 | 467 | 3.09 | 0.92 | 3 | 2 |  |
| How important is it for you to solve your problems on your own?                                      | indepprob  | 1 | 5  | 2036 | 3.81 | 0.94 | 4 | 2 | 2094 | 3.93 | 0.885 | 4 | 2 | 467 | 3.71 | .973 | 4 | 1 |  |



|                                                                                                                   |                       |   |   |      |      |      |   |   |      |      |      |   |   |     |      |      |   |   |  |
|-------------------------------------------------------------------------------------------------------------------|-----------------------|---|---|------|------|------|---|---|------|------|------|---|---|-----|------|------|---|---|--|
| How often do you worry about what other people think about you?                                                   | commother             | 1 | 5 | 2036 | 2.95 | 1.05 | 3 | 2 | 2091 | 2.72 | 1.04 | 3 | 1 | 466 | 2.90 | 0.99 | 3 | 2 |  |
| When making an important decision in your personal life, how often do you take other people's needs into account? | commdecis             | 1 | 5 | 2035 | 3.54 | 0.92 | 4 | 1 | 2091 | 3.54 | 0.91 | 4 | 1 | 466 | 3.83 | 0.87 | 4 | 1 |  |
| How often do friends talk to you about their problems?                                                            | commfriend            | 1 | 5 | 2036 | 3.23 | 0.95 | 3 | 1 | 2091 | 3.23 | 0.93 | 3 | 1 | 466 | 3.49 | .95  | 4 | 1 |  |
| How easy is it for you to spot when someone in a group is feeling uncomfortable?                                  | commemp               | 1 | 5 | 2036 | 3.49 | 1.02 | 4 | 1 | 2091 | 3.52 | 1.00 | 4 | 1 | 466 | 3.77 | 0.93 | 4 | 1 |  |
| How often do you talk to your friends about your problems?                                                        | exprfriend            | 1 | 5 | 2032 | 2.60 | 0.91 | 3 | 1 | 2088 | 2.55 | 0.88 | 2 | 1 | 463 | 2.81 | .88  | 3 | 1 |  |
| How easy is it for you to express what you are feeling to others?                                                 | expbrother            | 1 | 5 | 2032 | 2.64 | 1.15 | 3 | 1 | 2089 | 2.75 | 1.17 | 3 | 2 | 463 | 2.89 | 1.11 | 3 | 2 |  |
| How easy is it for you to understand your own feelings?                                                           | exprown               | 1 | 5 | 2032 | 3.36 | 1.09 | 3 | 1 | 2089 | 3.49 | 1.01 | 4 | 1 | 463 | 3.36 | 1.05 | 3 | 1 |  |
| When you are in need, how easy is it for you to ask other people for help?                                        | Exprhelp <sup>x</sup> | 1 | 5 | 2032 | 2.31 | 1.07 | 2 | 2 | 2089 | 2.20 | 1.08 | 2 | 2 | 463 | 2.48 | 1.10 | 2 | 1 |  |
| <b>Gender relations</b>                                                                                           |                       |   |   |      |      |      |   |   |      |      |      |   |   |     |      |      |   |   |  |
| In the past year, how often did you have someone to give you advice?                                              | socsupadv             | 1 | 5 | 2018 | 3.12 | 1.04 | 3 | 2 | 2061 | 3.00 | 1.02 | 3 | 2 | 455 | 3.24 | 1.10 | 3 | 2 |  |
| In the past year, how often did you have someone to show you love and affection?                                  | socsuplove            | 1 | 5 | 2018 | 3.56 | 1.18 | 4 | 2 | 2061 | 3.61 | 1.16 | 4 | 2 | 455 | 3.75 | 1.16 | 4 | 2 |  |
| In the past year, how often did you have someone to help you with daily chores?                                   | socsupchores          | 1 | 5 | 2018 | 2.96 | 1.21 | 3 | 2 | 2061 | 2.89 | 1.24 | 3 | 2 | 455 | 3.02 | 1.28 | 3 | 2 |  |
| In the past year, how often did you feel lonely?                                                                  | socsuplone            | 1 | 5 | 2018 | 3.36 | 1.06 | 3 | 1 | 2061 | 3.58 | 1.06 | 4 | 1 | 455 | 2.47 | 1.01 | 2 | 1 |  |
| Because of your gender, how often have you felt discriminated against?                                            | discrugen             | 1 | 5 | 2018 | 1.96 | 0.95 | 2 | 2 | 2061 | 1.81 | 0.89 | 2 | 1 | 455 | 2.05 | 0.92 | 2 | 1 |  |
| Because of your gender, how often have you felt discriminated against when getting hired?                         | discrhire*            | 1 | 5 | 2051 | 1.59 | 0.93 | 1 | 1 | 2061 | 1.60 | 0.89 | 1 | 1 | 455 | 1.47 | 0.82 | 1 | 1 |  |
| Because of your gender, how often have you felt discriminated against when at school?                             | discred               | 1 | 5 | 2018 | 1.63 | 0.91 | 1 | 1 | 2060 | 1.49 | 0.81 | 1 | 1 | 351 | 1.30 | 0.69 | 1 | 0 |  |
| Because of your gender, how often have you felt                                                                   | discredmed            | 1 | 5 | 2018 | 1.53 | 0.93 | 1 | 1 | 2061 | 1.37 | 0.78 | 1 | 0 | 455 | 1.47 | 0.84 | 1 | 1 |  |

|                                                                                                      |          |   |   |      |      |      |   |   |      |      |       |   |   |     |      |      |   |   |  |
|------------------------------------------------------------------------------------------------------|----------|---|---|------|------|------|---|---|------|------|-------|---|---|-----|------|------|---|---|--|
| discriminated against when receiving medical care?                                                   |          |   |   |      |      |      |   |   |      |      |       |   |   |     |      |      |   |   |  |
| Because of your gender, how often have you felt discriminated against in public settings?            | discrpub | 1 | 5 | 2018 | 1.89 | 0.96 | 1 | 2 | 2061 | 1.71 | 0.89  | 1 | 1 | 455 | 1.89 | 0.95 | 2 | 1 |  |
| Because of your gender, how often have you felt discriminated against in your family?                | discrfam | 1 | 5 | 2018 | 1.58 | 0.94 | 1 | 1 | 2061 | 1.47 | 0.849 | 1 | 1 | 455 | 1.48 | 0.85 | 1 | 1 |  |
| In the past year, how would you describe the quality of your relationship with your close relatives? | qualfam  | 1 | 5 | 2017 | 3.59 | 1.02 | 4 | 1 | 2059 | 3.53 | 1.02  | 2 | 1 | 452 | 3.81 | 0.95 | 4 | 1 |  |
| In the past month, how often have you argued with close relatives?                                   | famarg   | 1 | 5 | 2017 | 4.15 | 0.91 | 4 | 1 | 2059 | 4.31 | 0.85  | 1 | 1 | 452 | 4.34 | 0.80 | 2 | 1 |  |

Note: Items marked with \* are recoded so that people not currently taking care of someone or not currently employed (or employed in the past) have been ascribed the value one. The recoding varies depending on the item. Items marked with <sup>x</sup> are reverse-scored (see specifications in Table S2). Item with <sup>x</sup> has been reverse coded for the EFA and CFA.

**Table S2.** Response options for all 44 items included in the exploratory factor analyses.

| Item name                 |                                                                                                                                                                                             |
|---------------------------|---------------------------------------------------------------------------------------------------------------------------------------------------------------------------------------------|
| compdom                   | 1= Never, 2= Once in a while, 3= Sometimes, 4= Most of the time, 5=Always                                                                                                                   |
| compgen                   | 1= Much less competitive than others, 2= A bit less competitive than others, 3=About as competitive as others,<br>4=A bit more competitive than others, 5=Much more competitive than others |
| riskgen                   | 1=Not at all prepared, 2=Slightly prepared, 3=Moderately prepared, 4= very prepared, 5=Completely prepared                                                                                  |
| riskfinan                 | 1=Not at all prepared, 2=Slightly prepared, 3=Moderately prepared, 4= very prepared, 5=Completely prepared                                                                                  |
| riskrecrea                | 1=Not at all prepared, 2=Slightly prepared, 3=Moderately prepared, 4= very prepared, 5=Completely prepared                                                                                  |
| indepген                  | 1=Not at all important, 2= Slightly important, 3=Moderately important, 4=Very important, 5=Extremely important                                                                              |
| indepһelp                 | 1=Always, 2=Most of the time, 3=Sometimes, 4=Once in a while, 5=Never                                                                                                                       |
| indepһrob                 | 1=Not at all important, 2= Slightly important, 3=Moderately important, 4=Very important, 5=Extremely important                                                                              |
| commother                 | 1= Never, 2= Once in a while, 3= Sometimes, 4= Most of the time, 5=Always                                                                                                                   |
| commdecis                 | 1= Never, 2= Once in a while, 3= Sometimes, 4= Most of the time, 5=Always                                                                                                                   |
| commfriend                | 1= Never, 2= Once in a while, 3= Sometimes, 4= Most of the time, 5=Always                                                                                                                   |
| commemp                   | 1= Not at all easy, 2=Slightly easy, 3=Moderately easy, 4=Very easy, 5=Extremely easy                                                                                                       |
| exprfriend                | 1= Never, 2= Once in a while, 3= Sometimes, 4= Most of the time, 5=Always                                                                                                                   |
| exprother                 | 1= Not at all easy, 2=Slightly easy, 3=Moderately easy, 4=Very easy, 5=Extremely easy                                                                                                       |
| exprown                   | 1= Not at all easy, 2=Slightly easy, 3=Moderately easy, 4=Very easy, 5=Extremely easy                                                                                                       |
| Exprһelp (reverse scored) | 5= Not at all easy, 4=Slightly easy, 3=Moderately easy, 2=Very easy, 1=Extremely easy                                                                                                       |
| caremot                   | 1= Never, 2= Once in a while, 3= Sometimes, 4= Most of the time, 5=Always                                                                                                                   |
| carephys                  | 1= Never, 2= Once in a while, 3= Sometimes, 4= Most of the time, 5=Always                                                                                                                   |
| carefut                   | 1= Never, 2= Once in a while, 3= Sometimes, 4= Most of the time, 5=Always                                                                                                                   |
| timesleep                 | Numerical estimate of daily time-spending (0-24)                                                                                                                                            |
| timework                  | Numerical estimate of daily time-spending (0-24)                                                                                                                                            |
| timehouse                 | Numerical estimate of daily time-spending (0-24)                                                                                                                                            |
| timeleisure               | Numerical estimate of daily time-spending (0-24)                                                                                                                                            |
| timeexc                   | Numerical estimate of daily time-spending (0-24)                                                                                                                                            |
| timecare                  | Numerical estimate of daily time-spending (0-24)                                                                                                                                            |
| timecom                   | Numerical estimate of daily time-spending (0-24)                                                                                                                                            |
| workspeed                 | 1= Never, 2= Once in a while, 3= Sometimes, 4= Most of the time, 5=Always                                                                                                                   |
| workrep                   | 1= Never, 2= Once in a while, 3= Sometimes, 4= Most of the time, 5=Always                                                                                                                   |
| workemot                  | 1= Never, 2= Once in a while, 3= Sometimes, 4= Most of the time, 5=Always                                                                                                                   |
| workphys                  | 1= Never, 2= Once in a while, 3= Sometimes, 4= Most of the time, 5=Always                                                                                                                   |
| workrisk                  | 1= Never, 2= Once in a while, 3= Sometimes, 4= Most of the time, 5=Always                                                                                                                   |
| workhaz                   | 1= Never, 2= Once in a while, 3= Sometimes, 4= Most of the time, 5=Always                                                                                                                   |
| socsupadv                 | 1= Never, 2= Once in a while, 3= Sometimes, 4= Most of the time, 5=Always                                                                                                                   |
| socsuplove                | 1= Never, 2= Once in a while, 3= Sometimes, 4= Most of the time, 5=Always                                                                                                                   |
| socsupchores              | 1= Never, 2= Once in a while, 3= Sometimes, 4= Most of the time, 5=Always                                                                                                                   |
| socsuplone                | 5= Never, 4= Once in a while, 3= Sometimes, 2= Most of the time, 1=Always                                                                                                                   |
| discrgen                  | 1= Never, 2= Once in a while, 3= Sometimes, 4= Most of the time, 5=Always                                                                                                                   |
| discrhire                 | 1= Never, 2= Once in a while, 3= Sometimes, 4= Most of the time, 5=Always                                                                                                                   |
| discred                   | 1= Never, 2= Once in a while, 3= Sometimes, 4= Most of the time, 5=Always                                                                                                                   |
| discrmed                  | 1= Never, 2= Once in a while, 3= Sometimes, 4= Most of the time, 5=Always                                                                                                                   |
| discrpub                  | 1= Never, 2= Once in a while, 3= Sometimes, 4= Most of the time, 5=Always                                                                                                                   |
| discrfam                  | 1= Never, 2= Once in a while, 3= Sometimes, 4= Most of the time, 5=Always                                                                                                                   |
| qualfam                   | 1= Terrible, 2=Poor, 3=Average, 4=Good, 5=Excellent                                                                                                                                         |
| famarg                    | 5= Never, 4= Once in a while, 3= Sometimes, 2= Most of the time, 1=Always                                                                                                                   |

**Table S3.** Rank of gender characteristics based on occurrences (>2).

|                                        |                                                                                                                                                                                                                                                                                                                                                                                                                                                                                                                                                                                                                                                                                                                                                                   |
|----------------------------------------|-------------------------------------------------------------------------------------------------------------------------------------------------------------------------------------------------------------------------------------------------------------------------------------------------------------------------------------------------------------------------------------------------------------------------------------------------------------------------------------------------------------------------------------------------------------------------------------------------------------------------------------------------------------------------------------------------------------------------------------------------------------------|
| Expressiveness and emotionality (37)   | Emotional, Emotional, Emotional (+/-), Emotional control, Emotional Control, Emotional expressiveness (+/-), Emotional expressiveness (+/-), Emotional inexpressiveness, Emotionality, Expressiveness, Excitable, Excitable, Restricted emotionality, Restrictive emotion, Restrictive Emotionality, Restrictive emotionality, Inexpressive/Impassive, Concealing emotions, Feelings-easily-hurt (+/-), Fear of Unemotional Relationships, Personal sensitivity, Sensitive, Sentimental, Cries easily – Never cries, Secretive, Moody, Devaluation of emotion, Affection towards children, Affectionate, Restricted affectionate behavior between men, Devotion, Compassionate, Emotional, Sensitive, Affectionate, Easily expresses tender emotion, Affectionate |
| Empathy, caring and nurturing (37)     | Warm, Warm, Warm, Warmth, Friendly, Friendly, Helpful, Helpful (+-) Helpful, Likeable, Kind, Forgiving, Appreciative, Praising, Care for children, Caretaking, Affection towards children, Loves children, Fear of not Being Nurturant, Eager to soothe hurt feelings, Sensitive to other's needs, Nurturance, Home oriented, Domestic, Nurturance, Affiliative concerns, Understanding, Understanding of others, Tender, Empathetic, Tender, Nurturing, Understanding, Sympathetic, Helpful, Tender, Attentive to the needs of others, Loves children, Likes to care for others                                                                                                                                                                                  |
| Self-reliance and independence (18)    | Self-reliance, Self-reliance, Self-reliance, Self-Reliance, Self-sufficient, Indifferent-Needful of others approval (+/-), Independent, Independent, Individualistic, Dependence/Deference, Dependent, Autonomy, Individualism, Self-confident, Self-confident, Confident, Independent, Ability to implement action of one's own accord, Self-supportive                                                                                                                                                                                                                                                                                                                                                                                                          |
| Striving for status, competition, (17) | Achievement/Status, Pursuit of status, Status, Being admired and respected, Competition, Competitive, Competitive, Winning, Ambitious, Gives up easily/Never gives up, Power, Power, superior, Social Ascendancy, Status norm, Power-hungry, Ambitious                                                                                                                                                                                                                                                                                                                                                                                                                                                                                                            |
| Dominance (9)                          | Dominance, Dominance, Dominance, Dominant, Dominant, Forceful, Forceful, Autocratic, Control                                                                                                                                                                                                                                                                                                                                                                                                                                                                                                                                                                                                                                                                      |
| Toughness (9)                          | Tough, Toughness, Toughness, Toughness, Weak/Strong under pressure, Physical inadequacy, Physical toughness, Not being weak, Toughness norm, Emotional toughness,                                                                                                                                                                                                                                                                                                                                                                                                                                                                                                                                                                                                 |
| Decision-making (11)                   | Willing to take a stand, Make decisions easily (+/-), Makes decisions easily, Acts as a leader, Foresighted, Defends own beliefs, Hard-headed, Leadership ability, Solution-focused, Leadership abilities, Being a leader                                                                                                                                                                                                                                                                                                                                                                                                                                                                                                                                         |
| Aggressiveness (7)                     | Aggression, Aggressive, Aggressive, Aggressive, Aggression, Aggression, Aggressive                                                                                                                                                                                                                                                                                                                                                                                                                                                                                                                                                                                                                                                                                |
| Assertive (6)                          | Assertive, Assertive, Fear of Behaving Assertively, Outspoken, Frank, Boastful, Ostentatious                                                                                                                                                                                                                                                                                                                                                                                                                                                                                                                                                                                                                                                                      |
| Truthful, sincere, reliable (5)        | Truthful, Sincere, Sincere, Reliable, Conscientious                                                                                                                                                                                                                                                                                                                                                                                                                                                                                                                                                                                                                                                                                                               |
| Modesty (6)                            | Modesty, Shy, Modest, Gentle, Timid, Quiet                                                                                                                                                                                                                                                                                                                                                                                                                                                                                                                                                                                                                                                                                                                        |
| Risk (5)                               | Willing to take risks, Danger as exciting, Risk-taking, Enterprising, Orientation Toward Risk                                                                                                                                                                                                                                                                                                                                                                                                                                                                                                                                                                                                                                                                     |
| Adaptable, gullible (5)                | Adaptable, Gullible, Fickle, Yielding, Adaptive                                                                                                                                                                                                                                                                                                                                                                                                                                                                                                                                                                                                                                                                                                                   |
| Worry, fearful (3)                     | Worrying, Fearful, Need for security (+/-), Overcautious                                                                                                                                                                                                                                                                                                                                                                                                                                                                                                                                                                                                                                                                                                          |
| Active-Passive (4)                     | Passive-Active, Passivity, Activity-Passivity, Active                                                                                                                                                                                                                                                                                                                                                                                                                                                                                                                                                                                                                                                                                                             |
| Violence (3)                           | Violence, Violence, Violence as manly                                                                                                                                                                                                                                                                                                                                                                                                                                                                                                                                                                                                                                                                                                                             |
| Avoidance of femininity (3)            | Avoidance of Femininity, Avoidance of Femininity, Avoiding femininity, Anti-femininity.                                                                                                                                                                                                                                                                                                                                                                                                                                                                                                                                                                                                                                                                           |

**Table S4.** Search-terms for meta-analyses of existing scales measuring each gender variable.

| <b>Gender Variable</b>        | <b>Search terms</b>                                                                                                                                                                                                                      |
|-------------------------------|------------------------------------------------------------------------------------------------------------------------------------------------------------------------------------------------------------------------------------------|
| Caregiving                    | caregiv* [pubmed]; (caregiv* OR care*) [psychinfo]                                                                                                                                                                                       |
| Time Use                      | (“time use” OR “time poverty” OR “time deficit” OR “leisure time” OR “unpaid work” OR “domestic work” OR “leisure time physical activity” OR “physical activity” OR “paid work” OR “sleep” OR “sleep time” OR “sleep patterns”)          |
| Occupation                    | (“Occupational Segregation” OR “Occupational Preferences” OR “Occupational Patterns” OR “demand-control” OR “emotional labor” OR occupation OR profession OR “Job strain” OR “job hazard*” OR “occupational stratification”)             |
| Competitive/striving          | (“competitive attitude” OR competiti* OR success OR power OR winning OR striving)                                                                                                                                                        |
| Self-reliant/independent      | (“self-efficacy” OR “self-determination” OR agen* or assertive or adventurous OR “self-reliance” OR “self-reliant”)                                                                                                                      |
| Sensation-seeking/risk-taking | (“risk-taking” OR “sensation-seeking” OR “risky behavior”)                                                                                                                                                                               |
| Communal                      | (collective* OR “communal orientation” OR communal* OR agreeable OR interdependen* OR nurtur* OR “tender-minded*” OR connected)                                                                                                          |
| Empathetic                    | (empath* OR “emotional intelligence”)                                                                                                                                                                                                    |
| Expressive                    | (emotion* OR express* OR secretive OR extrover* OR introver* OR “restrictive emotionality” OR “restrictive emotional behavior” OR “affectionate behavior” OR affection OR inexpression OR impassive OR passivity OR “emotional control”) |
| Social Support                | “social support”                                                                                                                                                                                                                         |
| Gender Discrimination         | (“gender discrimination” OR discriminat*)                                                                                                                                                                                                |

**Table S5.** Health-related items and response options.

| <b>Item name</b>     | <b>Item</b>                                                                                                                                                                   | <b>Response categories</b>                                                                                                                                                                                |
|----------------------|-------------------------------------------------------------------------------------------------------------------------------------------------------------------------------|-----------------------------------------------------------------------------------------------------------------------------------------------------------------------------------------------------------|
| General health       | In general, would you say your health is...                                                                                                                                   | 1= Excellent, 2= Very good, 3=Good, 4=fair, 5=poor (recoded to dummy variable: excellent, very good, good=0, fair, poor=1)                                                                                |
| Physical health      | Now thinking about your physical health, which includes physical illness and injury, how many days during the past 30 days were your physical health not good?                | Number of days (1-30)                                                                                                                                                                                     |
| Mental health        | Now thinking about your mental health, which includes stress, depression, and problems with emotions, how many days during the past 30 days were your mental health not good? | Number of days (1-30)                                                                                                                                                                                     |
| Activity limitations | During the past 30 days, approximately how many days did poor physical or mental health keep you from doing your usual activities, such as self-care, work, or recreation?    | Number of days (1-30)                                                                                                                                                                                     |
| Smoking              | How many cigarettes do you smoke per day, not including e-cigarettes?                                                                                                         | Number of cigarettes (recoded to dummy variable: not smoking=0, smoking=1)                                                                                                                                |
| Vaping               | How many times do you vape or use an e-cigarette product per day?                                                                                                             | Number of times vaping (recoded to dummy variable: not vaping=0, vaping=1)                                                                                                                                |
| Binge drinking       | Men: In the past 3 months, how often have you had 5 or more drinks on one occasion?<br>Women: In the past 3 months, how often have you had 4 or more drinks on one occasion?  | 1=Never, 2=Less than monthly, 3=Monthly, 4=Weekly, 5=Daily or almost daily (recoded to unisex dummy variable: binge drinking less than monthly=0, binge drinking monthly, weekly or daily/almost daily=1) |
| BMI                  | [BMI is calculated based on self-reported height and weight]                                                                                                                  | BMI recoded to Dummy: BMI $\leq$ 25 = 0, BMI>25=1                                                                                                                                                         |

**Table S6.** Demographic items and response options.

| <b>Item name</b>                                | <b>Item</b>                                                                                                                                                                                                          | <b>Response categories</b>                                                    |
|-------------------------------------------------|----------------------------------------------------------------------------------------------------------------------------------------------------------------------------------------------------------------------|-------------------------------------------------------------------------------|
| Sex                                             | What was your birth sex?                                                                                                                                                                                             | 1=Male, 2=female, 3=intersex, 4=other (please specify), 5=prefer not to state |
| Gender (man)                                    | What is your gender (please select all that apply)                                                                                                                                                                   | 1=Man                                                                         |
| Gender (woman)                                  | What is your gender (please select all that apply)                                                                                                                                                                   | 1=Woman                                                                       |
| Gender (Gender fluid/Non-binary)                | What is your gender (please select all that apply)                                                                                                                                                                   | 1= Gender fluid/Non-binary/Gender “other”                                     |
| Gender (other)                                  | What is your gender (please select all that apply)                                                                                                                                                                   | 1=Other                                                                       |
| Ethnicity (White)                               | What category describes you (you may choose more than one)                                                                                                                                                           | 1=White                                                                       |
| Ethnicity (Hispanic, Latino, Spanish)           | What category describes you (you may choose more than one)                                                                                                                                                           | 1= Hispanic, Latino, Spanish                                                  |
| Ethnicity (Black, African, American)            | What category describes you (you may choose more than one)                                                                                                                                                           | 1=Black, African American                                                     |
| Ethnicity (Asian)                               | What category describes you (you may choose more than one)                                                                                                                                                           | 1=Asian                                                                       |
| Ethnicity (Native American or Alaska Native)    | What category describes you (you may choose more than one)                                                                                                                                                           | 1= Native American, Alaska Native                                             |
| Ethnicity (Middle Eastern or North American)    | What category describes you (you may choose more than one)                                                                                                                                                           | 1=Middle Eastern, North African                                               |
| Ethnicity (Native Hawaiian or Pacific Islander) | What category describes you (you may choose more than one)                                                                                                                                                           | 1= Native Hawaiian, Pacific Islander                                          |
| Ethnicity (Other)                               | What category describes you (you may choose more than one)                                                                                                                                                           | 1=Other                                                                       |
| Birth year                                      | In what year were you born?                                                                                                                                                                                          | 1= open numeric response option (1900-2000)                                   |
| Education level                                 | What is the highest degree or level of school you have completed? If currently enrolled, please report the highest degree received.                                                                                  | 1=No Schooling completed (...), 11=Doctorate degree                           |
| Personal income                                 | What was your income last calendar year? Please combine all incomes. “Incomes” include wages, salaries, small business earnings, social security, armed forces pay, special cash bonuses and subsistence allowances. | 1= Less than \$10.000 (...). 13= More than \$200.000                          |

**Table S7.** Recoding of ten variables to allow for the largest possible sample in the EFA.

|                                                                                                                                                                                                                                                                                                                                                                                                                  |
|------------------------------------------------------------------------------------------------------------------------------------------------------------------------------------------------------------------------------------------------------------------------------------------------------------------------------------------------------------------------------------------------------------------|
| <p><b>Caregiving items</b><br/>The group of current caregivers in sample 1 consists of 605 respondents. To utilize the largest possible sample in the EFA, we recoded the following three items so that people not currently taking care of someone in need were ascribed the value 1 (same procedure was used in samples 2 and 3)</p>                                                                           |
| <p><b>caremot.</b> In the past year, how often did you feel emotionally exhausted because of your caretaking responsibilities? <b>1= Never</b>, 2= Once in a while, 3= Sometimes, 4= Most of the time, 5=Always</p>                                                                                                                                                                                              |
| <p><b>carephys.</b> In the past year, how often did you feel physically exhausted because of your caretaking responsibilities? <b>1= Never</b>, 2= Once in a while, 3= Sometimes, 4= Most of the time, 5=Always</p>                                                                                                                                                                                              |
| <p><b>carefut.</b> In the past year, how often have your caretaking responsibilities caused you to worry about the future? <b>1= Never</b>, 2= Once in a while, 3= Sometimes, 4= Most of the time, 5=Always</p>                                                                                                                                                                                                  |
| <p><b>Work items</b><br/>The group of current employees in sample 1 consists of 1462 respondents. To utilize the largest possible sample in the EFA, we recoded the following six items so that people not currently employed were ascribed the value 1 (same procedure was used in sample 2)</p>                                                                                                                |
| <p><b>workspeed.</b> How often does your job require working fast? <b>1= Never</b>, 2= Once in a while, 3= Sometimes, 4= Most of the time, 5=Always</p>                                                                                                                                                                                                                                                          |
| <p><b>workrep.</b> How often does your job involve repetitive tasks? <b>1= Never</b>, 2= Once in a while, 3= Sometimes, 4= Most of the time, 5=Always</p>                                                                                                                                                                                                                                                        |
| <p><b>workemot.</b> How often do you feel emotionally exhausted from your work activities? <b>1= Never</b>, 2= Once in a while, 3= Sometimes, 4= Most of the time, 5=Always</p>                                                                                                                                                                                                                                  |
| <p><b>workphys.</b> How often do you feel physically exhausted from your work activities? <b>1= Never</b>, 2= Once in a while, 3= Sometimes, 4= Most of the time, 5=Always</p>                                                                                                                                                                                                                                   |
| <p><b>workrisk.</b> How often does your job involve risk of harm or injury? <b>1= Never</b>, 2= Once in a while, 3= Sometimes, 4= Most of the time, 5=Always</p>                                                                                                                                                                                                                                                 |
| <p><b>workhaz.</b> How often does your job involve hazards, such as smoke, heat, noise, or chemicals? <b>1= Never</b>, 2= Once in a while, 3= Sometimes, 4= Most of the time, 5=Always</p>                                                                                                                                                                                                                       |
| <p><b>Discrimination</b><br/>258 respondents have never worked and were not asked the question about perceived discrimination when getting hired (discrhire) in sample 1. To utilize the largest possible sample in the EFA, we recoded this item so that respondents that have never worked were ascribed the value 1 (all respondents were asked this question in sample 2, so no recoding was necessary).</p> |
| <p><b>discrhire.</b> Because of your gender, how often have you felt discriminated against, when getting hired? <b>1= Never</b>, 2= Once in a while, 3= Sometimes, 4= Most of the time, 5=Always</p>                                                                                                                                                                                                             |



**Table S8.** Exploratory Factor Analysis (Full factor model).

|                                  | 1            | 2            | 3            | 4            | 5            | 6            | 7            |
|----------------------------------|--------------|--------------|--------------|--------------|--------------|--------------|--------------|
| <i>discrgen</i>                  | <b>0.853</b> | -0.043       | -0.060       | -0.077       | 0.093        | -0.003       | 0.093        |
| <i>discrpub</i>                  | <b>0.840</b> | 0.002        | -0.056       | -0.063       | 0.055        | 0.012        | 0.035        |
| <i>discred</i>                   | <b>0.811</b> | -0.031       | -0.049       | 0.033        | -0.054       | 0.040        | -0.007       |
| <i>discrmed</i>                  | <b>0.753</b> | 0.012        | 0.033        | -0.010       | -0.050       | 0.047        | -0.008       |
| <i>discrhire</i>                 | <b>0.728</b> | 0.082        | 0.021        | 0.009        | -0.039       | 0.066        | 0.070        |
| <i>discrfam</i>                  | <b>0.624</b> | -0.019       | 0.047        | 0.002        | -0.003       | -0.128       | -0.042       |
| <i>workspeed</i>                 | -0.041       | <b>0.831</b> | -0.006       | -0.046       | 0.084        | 0.053        | 0.068        |
| <i>workphys</i>                  | 0.017        | <b>0.816</b> | 0.020        | -0.014       | -0.003       | -0.086       | -0.066       |
| <i>workemot</i>                  | 0.052        | <b>0.800</b> | 0.019        | -0.086       | 0.018        | -0.058       | -0.019       |
| <i>workrep</i>                   | -0.031       | <b>0.799</b> | 0.003        | -0.065       | 0.040        | 0.014        | 0.039        |
| <i>timework</i>                  | -0.120       | <b>0.582</b> | -0.155       | -0.024       | 0.016        | 0.071        | 0.122        |
| <i>workrisk</i>                  | 0.126        | <b>0.493</b> | 0.039        | 0.182        | -0.141       | -0.014       | -0.101       |
| <i>workhaz</i>                   | 0.116        | <b>0.427</b> | 0.026        | 0.167        | -0.118       | -0.042       | -0.102       |
| <i>timeleisure</i>               | 0.042        | -0.358       | -0.343       | 0.015        | -0.034       | -0.127       | -0.128       |
| <i>timehouse</i>                 | 0.069        | -0.230       | 0.130        | 0.056        | 0.060        | 0.019        | 0.068        |
| <i>timecom</i>                   | -0.003       | 0.162        | -0.061       | 0.150        | 0.058        | -0.069       | 0.014        |
| <i>carephys</i>                  | -0.010       | -0.001       | <b>0.938</b> | 0.007        | -0.020       | 0.008        | -0.025       |
| <i>careemot</i>                  | -0.003       | -0.006       | <b>0.933</b> | 0.001        | 0.015        | -0.027       | -0.015       |
| <i>carefut</i>                   | -0.018       | -0.006       | <b>0.903</b> | 0.003        | 0.000        | -0.021       | -0.011       |
| <i>timecare</i>                  | -0.006       | -0.126       | <b>0.703</b> | -0.080       | 0.055        | 0.069        | 0.068        |
| <i>timesleep</i>                 | 0.017        | -0.042       | -0.175       | -0.047       | -0.001       | 0.053        | -0.005       |
| <i>riskgen</i>                   | 0.029        | -0.047       | 0.000        | <b>0.754</b> | -0.050       | 0.113        | 0.123        |
| <i>riskfinan</i>                 | -0.031       | 0.057        | 0.025        | <b>0.670</b> | -0.149       | 0.109        | 0.028        |
| <i>riskrecrea</i>                | 0.023        | 0.010        | -0.003       | <b>0.593</b> | -0.028       | 0.069        | 0.051        |
| <i>compgen</i>                   | -0.125       | -0.031       | 0.006        | <b>0.528</b> | 0.077        | -0.142       | 0.088        |
| <i>compdom</i>                   | -0.021       | -0.001       | 0.026        | <b>0.489</b> | 0.054        | -0.226       | -0.014       |
| <i>timeexc</i>                   | 0.019        | -0.072       | -0.120       | 0.243        | 0.044        | -0.008       | 0.013        |
| <i>commfriend</i>                | 0.060        | 0.004        | -0.011       | -0.006       | <b>0.667</b> | -0.091       | 0.093        |
| <i>commemp</i>                   | 0.003        | 0.012        | -0.003       | 0.024        | <b>0.587</b> | -0.086       | 0.201        |
| <i>exprfriend</i>                | -0.010       | 0.030        | -0.034       | 0.051        | <b>0.522</b> | -0.034       | -0.295       |
| <i>commdecis</i>                 | -0.032       | -0.035       | 0.124        | -0.170       | <b>0.466</b> | 0.037        | 0.049        |
| <i>exprother</i>                 | -0.049       | 0.008        | 0.001        | 0.101        | <b>0.434</b> | 0.199        | -0.110       |
| <i>exprown</i>                   | -0.042       | -0.006       | -0.016       | 0.022        | 0.367        | 0.252        | 0.137        |
| <i>socsuplone</i>                | -0.064       | 0.002        | -0.057       | -0.060       | -0.143       | <b>0.709</b> | 0.064        |
| <i>socsuplove</i>                | 0.098        | -0.030       | 0.058        | -0.073       | 0.188        | <b>0.619</b> | -0.063       |
| <i>socsupchores</i>              | 0.112        | 0.010        | 0.087        | -0.004       | -0.028       | <b>0.510</b> | -0.191       |
| <i>qualfam</i>                   | -0.089       | -0.043       | -0.037       | 0.070        | 0.101        | 0.386        | -0.043       |
| <i>commother</i>                 | 0.019        | 0.016        | 0.004        | -0.048       | 0.240        | -0.386       | -0.198       |
| <i>socsupadv</i>                 | 0.059        | -0.011       | -0.033       | 0.000        | 0.235        | 0.296        | -0.233       |
| <i>qualfamarg</i>                | -0.167       | 0.007        | -0.100       | -0.226       | 0.001        | 0.263        | 0.142        |
| <i>indepprob</i>                 | 0.051        | -0.001       | 0.039        | 0.193        | 0.194        | -0.006       | <b>0.706</b> |
| <i>indeppen</i>                  | 0.052        | 0.034        | -0.013       | 0.157        | 0.203        | 0.030        | <b>0.679</b> |
| <i>indephelp</i>                 | 0.002        | -0.013       | -0.011       | -0.049       | -0.133       | -0.044       | <b>0.568</b> |
| <i>Exprhelp (reverse scored)</i> | 0.048        | -0.038       | 0.053        | -0.196       | -0.132       | -0.207       | <b>0.489</b> |

Note: N=1999. KMO: 0.826; Bartlett's Test of Sphericity:  $\chi^2 = 36185.003$ ,  $df = 946$ ,  $p < 0.001$ , Extraction method: Principal Axis Factoring. Rotation Method: Promax w. Kaiser Normalization. Rotation converged in 8 iterations. Total Variance Explained: 50.8%. Item loadings from the Pattern Matrix. The total variance explained by each factor was: Factor 1= 12.5%, Factor 2= 9.1%, Factor 3= 8.4%, Factor 4= 7.4%, Factor 5= 5.4%, Factor 6= 4.4%, Factor 7= 3.7%.

**Table S9.** Communalities and unique variances for exploratory factor analysis presented in Table S8.

| Communalities            | Unique Variance |            |      |
|--------------------------|-----------------|------------|------|
|                          | Initial         | Extraction |      |
| caremot                  | 0.85            | 0.88       | 0.12 |
| carefut                  | 0.79            | 0.81       | 0.19 |
| carephys                 | 0.84            | 0.87       | 0.13 |
| commdecis                | 0.22            | 0.22       | 0.78 |
| commemp                  | 0.26            | 0.30       | 0.7  |
| commfriend               | 0.33            | 0.40       | 0.6  |
| commother                | 0.26            | 0.21       | 0.79 |
| compdom                  | 0.40            | 0.26       | 0.74 |
| compgen                  | 0.39            | 0.28       | 0.72 |
| discred                  | 0.56            | 0.62       | 0.38 |
| discrfam                 | 0.43            | 0.46       | 0.54 |
| discrgen                 | 0.67            | 0.72       | 0.28 |
| discrhire                | 0.51            | 0.52       | 0.48 |
| discrmed                 | 0.50            | 0.55       | 0.45 |
| discrpub                 | 0.66            | 0.69       | 0.31 |
| exprfriend               | 0.42            | 0.47       | 0.53 |
| exprhelp (reverse coded) | 0.48            | 0.47       | 0.53 |
| exprother                | 0.43            | 0.37       | 0.63 |
| exprown                  | 0.30            | 0.24       | 0.76 |
| indepgen                 | 0.41            | 0.44       | 0.56 |
| indephep                 | 0.36            | 0.42       | 0.58 |
| indepprob                | 0.43            | 0.48       | 0.52 |
| qualfam                  | 0.24            | 0.23       | 0.77 |
| qualfamarg               | 0.20            | 0.20       | 0.8  |
| riskfinan                | 0.40            | 0.46       | 0.54 |
| riskgen                  | 0.48            | 0.57       | 0.43 |
| riskrecrea               | 0.35            | 0.36       | 0.64 |
| socsupadv                | 0.33            | 0.30       | 0.7  |
| socsupchores             | 0.37            | 0.31       | 0.69 |
| socsuplone               | 0.37            | 0.49       | 0.51 |
| socsuplove               | 0.50            | 0.49       | 0.51 |
| timecare                 | 0.54            | 0.51       | 0.49 |
| timecom                  | 0.15            | 0.07       | 0.93 |
| timeexc                  | 0.26            | 0.07       | 0.93 |
| timehouse                | 0.24            | 0.07       | 0.93 |
| timeleisure              | 0.45            | 0.30       | 0.7  |
| timesleep                | 0.10            | 0.04       | 0.96 |
| timework                 | 0.50            | 0.37       | 0.63 |
| workemot                 | 0.60            | 0.63       | 0.37 |
| workhaz                  | 0.49            | 0.28       | 0.72 |
| workphys                 | 0.63            | 0.67       | 0.33 |
| workrep                  | 0.61            | 0.62       | 0.38 |
| workrisk                 | 0.54            | 0.36       | 0.64 |
| workspeed                | 0.67            | 0.69       | 0.31 |

**Table S10.** Exploratory Factor Analysis (Full factor model), Oblimin rotation.

|                         | 1            | 2            | 3            | 4             | 5            | 6            | 7            |
|-------------------------|--------------|--------------|--------------|---------------|--------------|--------------|--------------|
| <i>discrgen</i>         | <b>0.853</b> | -0.034       | -0.007       | 0.072         | -0.081       | 0.086        | 0.089        |
| <i>discrpub</i>         | <b>0.841</b> | 0.009        | 0.009        | 0.065         | -0.066       | 0.033        | 0.059        |
| <i>discred</i>          | <b>0.806</b> | -0.022       | 0.039        | 0.058         | 0.023        | -0.002       | -0.040       |
| <i>discrmed</i>         | <b>0.749</b> | 0.016        | 0.045        | -0.025        | -0.018       | -0.003       | -0.035       |
| <i>discrhire</i>        | <b>0.724</b> | 0.088        | 0.063        | -0.017        | 0.001        | 0.073        | -0.025       |
| <i>discrfam</i>         | <b>0.633</b> | -0.017       | -0.120       | -0.043        | -0.011       | -0.036       | -0.003       |
| <i>workspeed</i>        | -0.010       | <b>0.821</b> | 0.062        | -0.037        | -0.026       | 0.071        | 0.101        |
| <i>workphys</i>         | 0.055        | <b>0.801</b> | -0.070       | -0.064        | -0.004       | -0.047       | 0.018        |
| <i>workrep</i>          | -0.001       | <b>0.786</b> | 0.021        | -0.043        | -0.049       | 0.049        | 0.059        |
| <i>workemot</i>         | 0.086        | <b>0.783</b> | -0.049       | -0.058        | -0.074       | -0.002       | 0.037        |
| <i>timework</i>         | -0.106       | <b>0.577</b> | 0.071        | 0.126         | -0.010       | 0.128        | 0.028        |
| <i>workrisk</i>         | 0.144        | <b>0.490</b> | 0.003        | -0.070        | 0.177        | -0.083       | -0.110       |
| <i>workhaz</i>          | 0.133        | <b>0.424</b> | -0.025       | -0.054        | 0.162        | -0.086       | -0.093       |
| <i>timehouse</i>        | 0.063        | -0.222       | 0.022        | -0.120        | 0.050        | 0.051        | 0.049        |
| <i>timecom</i>          | 0.012        | 0.169        | -0.051       | 0.043         | 0.149        | 0.007        | 0.054        |
| <i>socsuplone</i>       | -0.115       | 0.011        | <b>0.669</b> | 0.072         | -0.033       | 0.055        | -0.089       |
| <i>socsuplove</i>       | 0.074        | -0.017       | <b>0.603</b> | -0.049        | -0.031       | -0.106       | 0.223        |
| <i>socsupchores</i>     | 0.088        | 0.016        | <b>0.497</b> | -0.081        | 0.021        | -0.206       | 0.022        |
| <i>qualfam</i>          | -0.104       | -0.029       | 0.383        | 0.037         | 0.094        | -0.072       | 0.122        |
| <i>commother</i>        | 0.060        | 0.009        | -0.358       | -0.015        | -0.046       | -0.204       | 0.209        |
| <i>socsupadv</i>        | 0.063        | -0.001       | 0.303        | 0.030         | 0.034        | -0.268       | 0.253        |
| <i>qualfamarg</i>       | -0.189       | 0.003        | 0.231        | 0.113         | -0.209       | 0.140        | 0.008        |
| <i>carephys</i>         | -0.002       | -0.014       | 0.018        | <b>-0.937</b> | -0.007       | -0.039       | -0.009       |
| <i>careemot</i>         | 0.008        | -0.019       | -0.015       | <b>-0.933</b> | -0.013       | -0.032       | 0.021        |
| <i>carefut</i>          | -0.009       | -0.019       | -0.010       | <b>-0.903</b> | -0.011       | -0.027       | 0.006        |
| <i>timecare</i>         | -0.008       | -0.134       | 0.067        | <b>-0.692</b> | -0.086       | 0.047        | 0.054        |
| <i>timeleisure</i>      | 0.034        | -0.352       | -0.128       | 0.360         | 0.009        | -0.117       | -0.047       |
| <i>timesleep</i>        | 0.011        | -0.040       | 0.045        | 0.180         | -0.041       | -0.003       | 0.000        |
| <i>riskgen</i>          | 0.026        | -0.006       | 0.158        | -0.028        | <b>0.732</b> | 0.090        | -0.040       |
| <i>riskfinan</i>        | -0.035       | 0.087        | 0.147        | -0.054        | <b>0.649</b> | 0.012        | -0.127       |
| <i>riskrecrea</i>       | 0.025        | 0.041        | 0.108        | -0.023        | <b>0.578</b> | 0.026        | -0.019       |
| <i>compgen</i>          | -0.108       | -0.005       | -0.097       | -0.033        | <b>0.511</b> | 0.060        | 0.060        |
| <i>compdom</i>          | 0.002        | 0.020        | -0.179       | -0.053        | <b>0.469</b> | -0.032       | 0.039        |
| <i>timeexc</i>          | 0.022        | -0.055       | 0.009        | 0.112         | 0.239        | -0.001       | 0.039        |
| <i>indepprob</i>        | 0.047        | 0.024        | -0.001       | -0.046        | 0.178        | <b>0.663</b> | 0.146        |
| <i>indepgen</i>         | 0.047        | 0.058        | 0.032        | 0.006         | 0.146        | <b>0.637</b> | 0.158        |
| <i>indephep</i>         | -0.020       | -0.011       | -0.069       | 0.021         | -0.074       | <b>0.577</b> | -0.158       |
| <i>exprhelp reverse</i> | 0.034        | -0.048       | -0.234       | -0.037        | -0.224       | <b>0.511</b> | -0.165       |
| <i>commfriend</i>       | 0.102        | 0.021        | -0.058       | -0.004        | 0.026        | 0.019        | <b>0.613</b> |
| <i>commemp</i>          | 0.037        | 0.030        | -0.058       | -0.012        | 0.048        | 0.133        | <b>0.533</b> |
| <i>exprfriend</i>       | 0.032        | 0.041        | 0.005        | 0.014         | 0.088        | -0.349       | <b>0.503</b> |
| <i>commdecis</i>        | -0.011       | -0.031       | 0.045        | -0.125        | -0.140       | -0.003       | <b>0.434</b> |
| <i>exprother</i>        | -0.030       | 0.027        | 0.224        | -0.015        | 0.137        | -0.170       | <b>0.426</b> |
| <i>exprown</i>          | -0.038       | 0.012        | 0.259        | 0.011         | 0.052        | 0.082        | 0.353        |

Note: N=1999. KMO: 0.826; Bartlett's Test of Sphericity:  $\chi^2 = 36185.003$ ,  $df = 946$ ,  $p < 0.001$ , Extraction method: Principal Axis Factoring. Rotation Method: Direct Oblimin. Rotation converged in 8 iterations. Total Variance Explained: 50.8%. Item loadings from the Pattern Matrix. The total variance explained by each factor was: Factor 1= 12.5%, Factor 2= 9.1%, Factor 3= 8.36%, Factor 4= 7.4%, Factor 5= 5.4%, Factor 6= 4.4%, Factor 7= 3.7%.

**Table S11.** Exploratory Factor Analysis (Full factor model), Varimax rotation.

|                         | 1            | 2            | 3            | 4            | 5            | 6            | 7            |
|-------------------------|--------------|--------------|--------------|--------------|--------------|--------------|--------------|
| <i>discrgen</i>         | <b>0.832</b> | -0.006       | 0.001        | -0.026       | 0.131        | -0.070       | 0.041        |
| <i>discrpub</i>         | <b>0.822</b> | 0.038        | 0.005        | -0.011       | 0.110        | -0.054       | -0.009       |
| <i>discred</i>          | <b>0.784</b> | 0.016        | 0.001        | 0.062        | 0.026        | -0.028       | -0.039       |
| <i>discrmed</i>         | <b>0.732</b> | 0.050        | 0.079        | 0.024        | 0.030        | -0.020       | -0.036       |
| <i>discrhire</i>        | <b>0.703</b> | 0.123        | 0.073        | 0.050        | 0.033        | -0.001       | 0.041        |
| <i>discrfam</i>         | <b>0.644</b> | 0.014        | 0.092        | 0.022        | 0.038        | -0.169       | -0.062       |
| <i>qualfamarg</i>       | -0.245       | -0.037       | -0.130       | -0.212       | -0.023       | 0.234        | 0.142        |
| <i>workspeed</i>        | 0.002        | <b>0.816</b> | 0.060        | 0.066        | 0.103        | 0.066        | 0.077        |
| <i>workphys</i>         | 0.087        | <b>0.802</b> | 0.085        | 0.079        | 0.027        | -0.073       | -0.036       |
| <i>workrep</i>          | 0.013        | <b>0.778</b> | 0.063        | 0.035        | 0.058        | 0.020        | 0.057        |
| <i>workemot</i>         | 0.109        | <b>0.778</b> | 0.083        | 0.013        | 0.039        | -0.057       | 0.006        |
| <i>timework</i>         | -0.121       | <b>0.563</b> | -0.119       | 0.044        | 0.007        | 0.077        | 0.136        |
| <i>workrisk</i>         | 0.164        | <b>0.518</b> | 0.082        | 0.220        | -0.063       | -0.013       | -0.076       |
| <i>workhaz</i>          | 0.155        | <b>0.449</b> | 0.066        | 0.199        | -0.054       | -0.038       | -0.080       |
| <i>timeleisure</i>      | 0.018        | -0.367       | -0.365       | -0.035       | -0.073       | -0.121       | -0.123       |
| <i>timehouse</i>        | 0.069        | -0.205       | 0.125        | 0.038        | 0.063        | 0.020        | 0.043        |
| <i>timecom</i>          | 0.029        | 0.185        | -0.032       | 0.168        | 0.059        | -0.041       | 0.006        |
| <i>carephys</i>         | 0.075        | 0.032        | <b>0.927</b> | 0.001        | 0.064        | 0.000        | -0.025       |
| <i>careemot</i>         | 0.090        | 0.027        | <b>0.927</b> | -0.002       | 0.088        | -0.031       | -0.020       |
| <i>carefut</i>          | 0.069        | 0.025        | <b>0.895</b> | -0.003       | 0.071        | -0.026       | -0.014       |
| <i>timecare</i>         | 0.035        | -0.108       | <b>0.686</b> | -0.084       | 0.096        | 0.054        | 0.051        |
| <i>timesleep</i>        | -0.013       | -0.054       | -0.180       | -0.045       | -0.011       | 0.046        | -0.007       |
| <i>riskgen</i>          | 0.041        | 0.085        | 0.033        | <b>0.722</b> | 0.043        | 0.170        | 0.084        |
| <i>riskfinan</i>        | -0.020       | 0.165        | 0.047        | <b>0.637</b> | -0.046       | 0.155        | 0.016        |
| <i>riskrecrea</i>       | 0.044        | 0.112        | 0.028        | <b>0.575</b> | 0.049        | 0.120        | 0.021        |
| <i>compgen</i>          | -0.063       | 0.055        | 0.037        | <b>0.502</b> | 0.084        | -0.067       | 0.061        |
| <i>compdom</i>          | 0.060        | 0.080        | 0.064        | <b>0.466</b> | 0.070        | -0.156       | -0.032       |
| <i>timeexc</i>          | 0.027        | -0.031       | -0.105       | 0.234        | 0.056        | 0.022        | -0.008       |
| <i>commfriend</i>       | 0.156        | 0.032        | 0.062        | 0.092        | <b>0.604</b> | -0.001       | -0.015       |
| <i>exprfriend</i>       | 0.100        | 0.050        | 0.022        | 0.139        | <b>0.539</b> | 0.072        | -0.373       |
| <i>commemp</i>          | 0.080        | 0.042        | 0.061        | 0.105        | <b>0.512</b> | -0.008       | 0.104        |
| <i>exprother</i>        | -0.002       | 0.040        | 0.039        | 0.179        | <b>0.473</b> | 0.279        | -0.193       |
| <i>commdecis</i>        | 0.019        | -0.041       | 0.153        | -0.098       | <b>0.426</b> | 0.084        | -0.023       |
| <i>exprown</i>          | -0.045       | 0.017        | 0.011        | 0.088        | 0.369        | 0.294        | 0.060        |
| <i>socsuplone</i>       | -0.213       | -0.006       | -0.099       | -0.038       | -0.034       | <b>0.658</b> | 0.051        |
| <i>socsuplove</i>       | 0.028        | -0.019       | 0.058        | 0.001        | 0.304        | <b>0.614</b> | -0.130       |
| <i>socsupchores</i>     | 0.052        | 0.021        | 0.076        | 0.036        | 0.113        | <b>0.492</b> | -0.218       |
| <i>qualfam</i>          | -0.133       | -0.027       | -0.044       | 0.100        | 0.169        | 0.405        | -0.081       |
| <i>socsupadv</i>        | 0.064        | 0.000        | -0.016       | 0.063        | 0.315        | 0.332        | -0.287       |
| <i>commother</i>        | 0.132        | 0.008        | 0.038        | -0.027       | 0.186        | -0.330       | -0.209       |
| <i>indepprob</i>        | 0.024        | 0.059        | 0.076        | 0.200        | 0.101        | -0.010       | <b>0.648</b> |
| <i>indepgen</i>         | 0.018        | 0.086        | 0.024        | 0.174        | 0.113        | 0.025        | <b>0.621</b> |
| <i>indephep</i>         | -0.072       | -0.015       | -0.023       | -0.087       | -0.231       | -0.107       | <b>0.582</b> |
| <i>exprhelp_reverse</i> | 0.002        | -0.064       | 0.038        | -0.238       | -0.256       | -0.279       | <b>0.518</b> |

Note: N=1999. KMO: 0.826; Bartlett's Test of Sphericity:  $\chi^2 = 36185.003$ ,  $df = 946$ ,  $p < 0.001$ , Extraction method: Principal Axis Factoring. Rotation Method: Varimax. Rotation converged in 8 iterations. Total Variance Explained: 50.8%. Item loadings from the Pattern Matrix. The total variance explained by each factor was: Factor 1= 12.5%, Factor 2= 9.1%, Factor 3= 8.36%, Factor 4= 7.4%, Factor 5= 5.4%, Factor 6= 4.4%, Factor 7= 3.7%.

**Table S12.** Exploratory Factor Analysis (Full factor model), Equamax rotation.

|                         | 1            | 2            | 3            | 4            | 5            | 6            | 7            |
|-------------------------|--------------|--------------|--------------|--------------|--------------|--------------|--------------|
| <i>discrgen</i>         | <b>0.832</b> | -0.006       | 0.001        | -0.026       | 0.131        | -0.070       | 0.041        |
| <i>discrpub</i>         | <b>0.822</b> | 0.038        | 0.005        | -0.011       | 0.110        | -0.054       | -0.009       |
| <i>discred</i>          | <b>0.784</b> | 0.016        | 0.001        | 0.062        | 0.026        | -0.028       | -0.039       |
| <i>discrmed</i>         | <b>0.732</b> | 0.050        | 0.079        | 0.024        | 0.030        | -0.020       | -0.036       |
| <i>discrhire</i>        | <b>0.703</b> | 0.123        | 0.073        | 0.050        | 0.033        | -0.001       | 0.041        |
| <i>discrfam</i>         | <b>0.644</b> | 0.014        | 0.092        | 0.022        | 0.038        | -0.169       | -0.062       |
| <i>qualfamarg</i>       | -0.245       | -0.037       | -0.130       | -0.212       | -0.023       | 0.234        | 0.142        |
| <i>workspeed</i>        | 0.002        | <b>0.816</b> | 0.060        | 0.066        | 0.103        | 0.066        | 0.077        |
| <i>workphys</i>         | 0.087        | <b>0.802</b> | 0.085        | 0.079        | 0.027        | -0.073       | -0.036       |
| <i>workrep</i>          | 0.013        | <b>0.778</b> | 0.063        | 0.035        | 0.058        | 0.020        | 0.057        |
| <i>workemot</i>         | 0.109        | <b>0.778</b> | 0.083        | 0.013        | 0.039        | -0.057       | 0.006        |
| <i>timework</i>         | -0.121       | <b>0.563</b> | -0.119       | 0.044        | 0.007        | 0.077        | 0.136        |
| <i>workrisk</i>         | 0.164        | <b>0.518</b> | 0.082        | 0.220        | -0.063       | -0.013       | -0.076       |
| <i>workhaz</i>          | 0.155        | <b>0.449</b> | 0.066        | 0.199        | -0.054       | -0.038       | -0.080       |
| <i>timeleisure</i>      | 0.018        | -0.367       | -0.365       | -0.035       | -0.073       | -0.121       | -0.123       |
| <i>timehouse</i>        | 0.069        | -0.205       | 0.125        | 0.038        | 0.063        | 0.020        | 0.043        |
| <i>timecom</i>          | 0.029        | 0.185        | -0.032       | 0.168        | 0.059        | -0.041       | 0.006        |
| <i>carephys</i>         | 0.075        | 0.032        | <b>0.927</b> | 0.001        | 0.064        | 0.000        | -0.025       |
| <i>careemot</i>         | 0.090        | 0.027        | <b>0.927</b> | -0.002       | 0.088        | -0.031       | -0.020       |
| <i>carefut</i>          | 0.069        | 0.025        | <b>0.895</b> | -0.003       | 0.071        | -0.026       | -0.014       |
| <i>timecare</i>         | 0.035        | -0.108       | <b>0.686</b> | -0.084       | 0.096        | 0.054        | 0.051        |
| <i>timesleep</i>        | -0.013       | -0.054       | -0.180       | -0.045       | -0.011       | 0.046        | -0.007       |
| <i>riskgen</i>          | 0.041        | 0.085        | 0.033        | <b>0.722</b> | 0.043        | 0.170        | 0.084        |
| <i>riskfinan</i>        | -0.020       | 0.165        | 0.047        | <b>0.637</b> | -0.046       | 0.155        | 0.016        |
| <i>riskrecrea</i>       | 0.044        | 0.112        | 0.028        | <b>0.575</b> | 0.049        | 0.120        | 0.021        |
| <i>compgen</i>          | -0.063       | 0.055        | 0.037        | <b>0.502</b> | 0.084        | -0.067       | 0.061        |
| <i>compdom</i>          | 0.060        | 0.080        | 0.064        | <b>0.466</b> | 0.070        | -0.156       | -0.032       |
| <i>timeexc</i>          | 0.027        | -0.031       | -0.105       | 0.234        | 0.056        | 0.022        | -0.008       |
| <i>commfriend</i>       | 0.156        | 0.032        | 0.062        | 0.092        | <b>0.604</b> | -0.001       | -0.015       |
| <i>exprfriend</i>       | 0.100        | 0.050        | 0.022        | 0.139        | <b>0.539</b> | 0.072        | -0.373       |
| <i>commemp</i>          | 0.080        | 0.042        | 0.061        | 0.105        | <b>0.512</b> | -0.008       | 0.104        |
| <i>exprother</i>        | -0.002       | 0.040        | 0.039        | 0.179        | <b>0.473</b> | 0.279        | -0.193       |
| <i>commdecis</i>        | 0.019        | -0.041       | 0.153        | -0.098       | <b>0.426</b> | 0.084        | -0.023       |
| <i>exprown</i>          | -0.045       | 0.017        | 0.011        | 0.088        | 0.369        | 0.294        | 0.060        |
| <i>socsuplone</i>       | -0.213       | -0.006       | -0.099       | -0.038       | -0.034       | <b>0.658</b> | 0.051        |
| <i>socsuplove</i>       | 0.028        | -0.019       | 0.058        | 0.001        | 0.304        | <b>0.614</b> | -0.130       |
| <i>socsupchores</i>     | 0.052        | 0.021        | 0.076        | 0.036        | 0.113        | <b>0.492</b> | -0.218       |
| <i>qualfam</i>          | -0.133       | -0.027       | -0.044       | 0.100        | 0.169        | 0.405        | -0.081       |
| <i>socsupadv</i>        | 0.064        | 0.000        | -0.016       | 0.063        | 0.315        | 0.332        | -0.287       |
| <i>commother</i>        | 0.132        | 0.008        | 0.038        | -0.027       | 0.186        | -0.330       | -0.209       |
| <i>indepprob</i>        | 0.024        | 0.059        | 0.076        | 0.200        | 0.101        | -0.010       | <b>0.648</b> |
| <i>indepgen</i>         | 0.018        | 0.086        | 0.024        | 0.174        | 0.113        | 0.025        | <b>0.621</b> |
| <i>indephep</i>         | -0.072       | -0.015       | -0.023       | -0.087       | -0.231       | -0.107       | <b>0.582</b> |
| <i>exprhelp_reverse</i> | 0.002        | -0.064       | 0.038        | -0.238       | -0.256       | -0.279       | <b>0.518</b> |

Note: N=1999. KMO: 0.826; Bartlett's Test of Sphericity:  $\chi^2 = 36185.003$ ,  $df = 946$ ,  $p < 0.001$ , Extraction method: Principal Axis Factoring. Rotation Method: Equamax. Rotation converged in 8 iterations. Total Variance Explained: 50.8%. Item loadings from the Pattern Matrix. The total variance explained by each factor was: Factor 1= 12.5%, Factor 2= 9.1%, Factor 3= 8.36%, Factor 4= 7.4%, Factor 5= 5.4%, Factor 6= 4.4%, Factor 7= 3.7%.

**Table S13.** Exploratory Factor Analysis (Full factor model), Quartimax rotation.

|                         | 1            | 2            | 3            | 4            | 5            | 6            | 7            |
|-------------------------|--------------|--------------|--------------|--------------|--------------|--------------|--------------|
| <i>discrgen</i>         | <b>0.833</b> | -0.004       | -0.001       | -0.026       | 0.127        | -0.065       | 0.047        |
| <i>discrpub</i>         | <b>0.823</b> | 0.040        | 0.003        | -0.011       | 0.107        | -0.049       | -0.004       |
| <i>discred</i>          | <b>0.784</b> | 0.018        | -0.001       | 0.062        | 0.024        | -0.022       | -0.035       |
| <i>discrmed</i>         | <b>0.733</b> | 0.052        | 0.077        | 0.023        | 0.028        | -0.015       | -0.032       |
| <i>discrhire</i>        | <b>0.703</b> | 0.126        | 0.070        | 0.049        | 0.030        | 0.003        | 0.045        |
| <i>discrfam</i>         | <b>0.646</b> | 0.016        | 0.090        | 0.022        | 0.035        | -0.164       | -0.059       |
| <i>qualfamarg</i>       | -0.248       | -0.040       | -0.129       | -0.212       | -0.021       | 0.232        | 0.141        |
| <i>workspeed</i>        | 0.000        | <b>0.817</b> | 0.056        | 0.060        | 0.102        | 0.065        | 0.078        |
| <i>workphys</i>         | 0.086        | <b>0.803</b> | 0.082        | 0.072        | 0.026        | -0.072       | -0.037       |
| <i>workrep</i>          | 0.011        | <b>0.779</b> | 0.060        | 0.029        | 0.056        | 0.020        | 0.057        |
| <i>workemot</i>         | 0.107        | <b>0.779</b> | 0.079        | 0.006        | 0.037        | -0.056       | 0.006        |
| <i>timework</i>         | -0.124       | <b>0.563</b> | -0.121       | 0.039        | 0.005        | 0.075        | 0.135        |
| <i>workrisk</i>         | 0.163        | <b>0.520</b> | 0.079        | 0.216        | -0.064       | -0.011       | -0.077       |
| <i>workhaz</i>          | 0.155        | <b>0.451</b> | 0.063        | 0.195        | -0.054       | -0.036       | -0.081       |
| <i>timeleisure</i>      | 0.019        | -0.369       | -0.363       | -0.032       | -0.072       | -0.120       | -0.124       |
| <i>timehouse</i>        | 0.069        | -0.204       | 0.125        | 0.040        | 0.062        | 0.019        | 0.044        |
| <i>timecom</i>          | 0.029        | 0.186        | -0.033       | 0.167        | 0.057        | -0.042       | 0.007        |
| <i>carephys</i>         | 0.077        | 0.036        | <b>0.927</b> | 0.001        | 0.064        | 0.001        | -0.025       |
| <i>caremot</i>          | 0.093        | 0.032        | <b>0.927</b> | -0.002       | 0.088        | -0.030       | -0.019       |
| <i>carefut</i>          | 0.072        | 0.029        | <b>0.894</b> | -0.003       | 0.071        | -0.025       | -0.013       |
| <i>timecare</i>         | 0.036        | -0.106       | <b>0.687</b> | -0.082       | 0.096        | 0.054        | 0.053        |
| <i>timesleep</i>        | -0.013       | -0.055       | -0.180       | -0.045       | -0.010       | 0.046        | -0.007       |
| <i>riskgen</i>          | 0.040        | 0.091        | 0.033        | <b>0.721</b> | 0.041        | 0.168        | 0.086        |
| <i>riskfinan</i>        | -0.021       | 0.170        | 0.046        | <b>0.636</b> | -0.046       | 0.154        | 0.017        |
| <i>riskrecrea</i>       | 0.043        | 0.117        | 0.028        | <b>0.575</b> | 0.049        | 0.119        | 0.023        |
| <i>compgen</i>          | -0.062       | 0.059        | 0.037        | <b>0.502</b> | 0.080        | -0.069       | 0.062        |
| <i>compdom</i>          | 0.062        | 0.084        | 0.063        | <b>0.465</b> | 0.067        | -0.157       | -0.031       |
| <i>timeexc</i>          | 0.027        | -0.029       | -0.105       | 0.234        | 0.055        | 0.021        | -0.006       |
| <i>commfriend</i>       | 0.158        | 0.035        | 0.061        | 0.093        | <b>0.604</b> | -0.008       | -0.003       |
| <i>exprfriend</i>       | 0.103        | 0.051        | 0.020        | 0.140        | <b>0.546</b> | 0.067        | -0.362       |
| <i>commemp</i>          | 0.081        | 0.045        | 0.060        | 0.106        | <b>0.509</b> | -0.015       | 0.114        |
| <i>exprother</i>        | -0.001       | 0.042        | 0.038        | 0.181        | <b>0.479</b> | 0.274        | -0.183       |
| <i>commdecis</i>        | 0.021        | -0.040       | 0.153        | -0.096       | <b>0.428</b> | 0.079        | -0.015       |
| <i>exprown</i>          | -0.047       | 0.018        | 0.011        | 0.090        | 0.372        | 0.289        | 0.068        |
| <i>socsuplone</i>       | -0.218       | -0.008       | -0.099       | -0.037       | -0.026       | <b>0.656</b> | 0.052        |
| <i>socsuplove</i>       | 0.025        | -0.019       | 0.057        | 0.003        | 0.314        | <b>0.611</b> | -0.122       |
| <i>socsupchores</i>     | 0.050        | 0.022        | 0.075        | 0.037        | 0.123        | <b>0.492</b> | -0.213       |
| <i>qualfam</i>          | -0.135       | -0.027       | -0.044       | 0.102        | 0.175        | 0.402        | -0.077       |
| <i>commother</i>        | 0.137        | 0.008        | 0.038        | -0.027       | 0.185        | -0.330       | -0.206       |
| <i>socsupadv</i>        | 0.064        | 0.001        | -0.017       | 0.065        | 0.324        | 0.330        | -0.279       |
| <i>indepprob</i>        | 0.021        | 0.062        | 0.076        | 0.199        | 0.089        | -0.014       | <b>0.650</b> |
| <i>indepgen</i>         | 0.014        | 0.089        | 0.025        | 0.173        | 0.102        | 0.020        | <b>0.623</b> |
| <i>indephep</i>         | -0.075       | -0.015       | -0.022       | -0.089       | -0.242       | -0.107       | <b>0.577</b> |
| <i>exprhelp_reverse</i> | 0.000        | -0.065       | 0.039        | -0.240       | -0.268       | -0.277       | <b>0.512</b> |

Note: N=1999. KMO: 0.826; Bartlett's Test of Sphericity:  $\chi^2 = 36185.003$ ,  $df = 946$ ,  $p < 0.001$ , Extraction method: Principal Axis Factoring. Rotation Method: Quartimax. Rotation converged in 8 iterations. Total Variance Explained: 50.8%. Item loadings from the Pattern Matrix. The total variance explained by each factor was: Factor 1= 12.5%, Factor 2= 9.1%, Factor 3= 8.36%, Factor 4= 7.4%, Factor 5= 5.4%, Factor 6= 4.4%, Factor 7= 3.7%.

**Table S14.** Factor loadings for CFA Models 1 and 2 in sample 1.

| Item                      |          | Model 1 | CI Lower | CI Upper | Model 2 | CI Lower | CI Upper |
|---------------------------|----------|---------|----------|----------|---------|----------|----------|
| discrgen                  | Factor 1 | 0.85    | .824     | .874     | 0.85    | 0.824    | 0.874    |
| discrhire                 | Factor 1 | 0.708   | .673     | .739     | 0.707   | 0.673    | 0.738    |
| discred                   | Factor 1 | 0.776   | .751     | .801     | 0.776   | 0.751    | 0.801    |
| discrmed                  | Factor 1 | 0.727   | .695     | .757     | 0.727   | 0.695    | 0.756    |
| discrpub                  | Factor 1 | 0.846   | .826     | .865     | 0.846   | 0.826    | 0.865    |
| discrfam                  | Factor 1 | 0.648   | .609     | .684     | 0.648   | 0.609    | 0.684    |
| workspeed                 | Factor 2 | 0.829   | .802     | .852     | 0.864   | 0.843    | 0.883    |
| workrep                   | Factor 2 | 0.8     | .775     | .823     | 0.821   | 0.799    | 0.841    |
| workemot                  | Factor 2 | 0.8     | .777     | .823     | 0.792   | 0.769    | 0.815    |
| workphys                  | Factor 2 | 0.816   | .795     | .837     | 0.775   | 0.752    | 0.798    |
| timework                  | Factor 2 | 0.501   | .458     | .543     | 0.52    | 0.478    | 0.56     |
| workrisk                  | Factor 2 | 0.532   | .500     | .565     |         |          |          |
| workhaz                   | Factor 2 | 0.459   | .424     | .494     |         |          |          |
| carephys                  | Factor 3 | 0.941   | .929     | .953     | 0.941   | 0.929    | 0.953    |
| careemot                  | Factor 3 | 0.953   | .938     | .967     | 0.953   | 0.938    | 0.967    |
| carefut                   | Factor 3 | 0.91    | .894     | .924     | 0.91    | 0.894    | 0.924    |
| timecare                  | Factor 3 | 0.644   | .598     | .686     | 0.643   | 0.598    | 0.686    |
| riskgen                   | Factor 4 | 0.802   | .765     | .835     | 0.836   | 0.799    | 0.874    |
| riskfinan                 | Factor 4 | 0.676   | .643     | .708     | 0.672   | 0.636    | 0.708    |
| riskrecrea                | Factor 4 | 0.647   | .611     | .682     | 0.649   | 0.611    | 0.685    |
| compgen                   | Factor 4 | 0.451   | .397     | .504     |         |          |          |
| compdom                   | Factor 4 | 0.396   | .336     | .456     |         |          |          |
| socsuplone                | Factor 5 | 0.421   | .364     | .473     |         |          |          |
| socsuplove                | Factor 5 | 0.929   | .867     | .996     | 0.754   | 0.727    | 0.779    |
| socsupchores              | Factor 5 | 0.59    | .537     | .643     | 0.726   | 0.703    | 0.749    |
| commfriend                | Factor 6 | 0.565   | .501     | .619     | 0.507   | 0.457    | 0.556    |
| commemp                   | Factor 6 | 0.476   | .410     | .528     |         |          |          |
| exprfriend                | Factor 6 | 0.595   | .546     | .648     | 0.754   | 0.705    | 0.81     |
| exprother                 | Factor 6 | 0.648   | .593     | .700     | 0.589   | 0.542    | 0.635    |
| commdecis                 | Factor 6 | 0.361   | .299     | .420     |         |          |          |
| exprown                   | Factor 6 | 0.474   | .420     | .525     |         |          |          |
| indepprob                 | Factor 7 | 0.804   | .722     | .846     | 0.79    | 0.712    | 0.872    |
| indepgen                  | Factor 7 | 0.719   | .655     | .757     | 0.762   | 0.683    | 0.844    |
| indephelp                 | Factor 7 | 0.434   | .367     | .549     |         |          |          |
| Exprhelp (reverse scored) | Factor 7 | 0.368   | .295     | .500     |         |          |          |

Note: The 95% confidence intervals were based on 2000 bootstrap samples

**Table S15.** Factor loadings for CFA Samples 2 and 3 (Configural invariance).

| Item         |          | Sample 2 | CI Lower | CI Upper | Sample 3 | CI Lower | CI Upper |
|--------------|----------|----------|----------|----------|----------|----------|----------|
| disrcgen     | Factor 1 | 0.492    | 0.445    | 0.533    | 0.86     | 0.799    | 0.914    |
| disrchire    | Factor 1 | 0.526    | 0.47     | 0.579    | 0.537    | 0.456    | 0.614    |
| discred      | Factor 1 | 0.566    | 0.517    | 0.613    |          |          |          |
| discrmed     | Factor 1 | 0.582    | 0.554    | 0.606    | 0.608    | 0.526    | 0.677    |
| discrpub     | Factor 1 | 0.62     | 0.578    | 0.66     | 0.845    | 0.794    | 0.894    |
| discrfam     | Factor 1 | 0.62     | 0.582    | 0.657    | 0.577    | 0.494    | 0.66     |
| workspeed    | Factor 2 | 0.625    | 0.579    | 0.667    | 0.905    | 0.874    | 0.934    |
| workrep      | Factor 2 | 0.679    | 0.64     | 0.714    | 0.865    | 0.827    | 0.897    |
| workemot     | Factor 2 | 0.693    | 0.655    | 0.727    | 0.872    | 0.835    | 0.907    |
| workphys     | Factor 2 | 0.717    | 0.638    | 0.802    | 0.825    | 0.786    | 0.865    |
| timework     | Factor 2 | 0.726    | 0.697    | 0.754    | 0.619    | 0.542    | 0.691    |
| carephys     | Factor 3 | 0.746    | 0.714    | 0.775    | 0.933    | 0.901    | 0.96     |
| caremot      | Factor 3 | 0.76     | 0.734    | 0.783    | 0.942    | 0.914    | 0.967    |
| carefut      | Factor 3 | 0.76     | 0.707    | 0.818    | 0.905    | 0.865    | 0.94     |
| timecare     | Factor 3 | 0.789    | 0.761    | 0.813    | 0.526    | 0.413    | 0.646    |
| riskgen      | Factor 4 | 0.791    | 0.765    | 0.817    | 0.82     | 0.667    | 1,006    |
| riskfinan    | Factor 4 | 0.837    | 0.746    | 0.935    | 0.575    | 0.456    | 0.682    |
| riskrecrea   | Factor 4 | 0.84     | 0.811    | 0.865    | 0.501    | 0.374    | 0.609    |
| socsuplove   | Factor 5 | 0.842    | 0.804    | 0.879    | 0.909    | 0.805    | 1,022    |
| socsupchores | Factor 5 | 0.85     | 0.824    | 0.873    | 0.607    | 0.538    | 0.653    |
| commfriend   | Factor 6 | 0.86     | 0.841    | 0.878    | 0.521    | 0.373    | 0.642    |
| exprfriend   | Factor 6 | 0.892    | 0.873    | 0.911    | 0.775    | 0.62     | 0.987    |
| exprother    | Factor 6 | 0.947    | 0.936    | 0.958    | 0.541    | 0.41     | 0.667    |
| indepprob    | Factor 7 | 0.971    | 0.959    | 0.98     | 0.768    | 0.555    | 1,147    |
| indepgen     | Factor 7 | 0.973    | 0.924    | 1,026    | 0.656    | 0.426    | 0.873    |

Note: The 95% confidence intervals were based on 2000 bootstrap samples



**Table S16. Factor loadings for CFA Samples 2 and 3 (Metric invariance, 24 items).**

| Item         |          | Sample 2 | CI Lower | CI Upper | Sample 3 | CI Lower | CI Upper |
|--------------|----------|----------|----------|----------|----------|----------|----------|
| discrgen     | Factor 1 | 0.86     | 0.835    | 0.883    | 0.843    | 0.802    | 0.88     |
| discrhire    | Factor 1 | 0.705    | 0.672    | 0.734    | 0.66     | 0.625    | 0.696    |
| discrmed     | Factor 1 | 0.671    | 0.636    | 0.703    | 0.609    | 0.556    | 0.658    |
| discrpub     | Factor 1 | 0.862    | 0.84     | 0.88     | 0.815    | 0.773    | 0.853    |
| discrfam     | Factor 1 | 0.621    | 0.58     | 0.66     | 0.597    | 0.542    | 0.653    |
| workspeed    | Factor 2 | 0.85     | 0.826    | 0.87     | 0.902    | 0.875    | 0.927    |
| workrep      | Factor 2 | 0.782    | 0.758    | 0.806    | 0.874    | 0.842    | 0.904    |
| workemot     | Factor 2 | 0.794    | 0.77     | 0.817    | 0.871    | 0.837    | 0.902    |
| workphys     | Factor 2 | 0.757    | 0.733    | 0.779    | 0.834    | 0.803    | 0.866    |
| timework     | Factor 2 | 0.522    | 0.484    | 0.558    | 0.471    | 0.423    | 0.523    |
| carephys     | Factor 3 | 0.947    | 0.936    | 0.957    | 0.937    | 0.91     | 0.961    |
| caremot      | Factor 3 | 0.97     | 0.959    | 0.98     | 0.944    | 0.918    | 0.967    |
| carefut      | Factor 3 | 0.894    | 0.876    | 0.912    | 0.895    | 0.854    | 0.929    |
| timecare     | Factor 3 | 0.625    | 0.587    | 0.667    | 0.471    | 0.384    | 0.575    |
| riskgen      | Factor 4 | 0.847    | 0.81     | 0.885    | 0.758    | 0.678    | 0.833    |
| riskfinan    | Factor 4 | 0.675    | 0.639    | 0.711    | 0.604    | 0.545    | 0.662    |
| riskrecrea   | Factor 4 | 0.614    | 0.577    | 0.649    | 0.551    | 0.493    | 0.609    |
| socsuplove   | Factor 5 | 0.964    | 0.915    | 1.014    | 0.946    | 0.875    | 1.017    |
| socsupchores | Factor 5 | 0.588    | 0.561    | 0.611    | 0.581    | 0.541    | 0.614    |
| commfriend   | Factor 6 | 0.529    | 0.476    | 0.582    | 0.515    | 0.452    | 0.583    |
| exprfriend   | Factor 6 | 0.763    | 0.707    | 0.817    | 0.754    | 0.666    | 0.836    |
| exprother    | Factor 6 | 0.56     | 0.512    | 0.608    | 0.572    | 0.506    | 0.631    |
| indepprob    | Factor 7 | 0.845    | 0.76     | 0.938    | 0.724    | 0.625    | 0.839    |
| indepgen     | Factor 7 | 0.71     | 0.636    | 0.785    | 0.696    | 0.605    | 0.785    |

Note: The 95% confidence intervals were based on 2000 bootstrap samples

**Table S17.** Factor loadings for final CFA in samples 2 and 3 (Scalar invariance, 24 items).

| Item         |          | Sample 2 | CI Lower | CI Upper | Sample 3 | CI Lower | CI Upper |
|--------------|----------|----------|----------|----------|----------|----------|----------|
| discrgen     | Factor 1 | 0.859    | 0.835    | 0.883    | 0.837    | 0.792    | 0.876    |
| discrhire    | Factor 1 | 0.701    | 0.667    | 0.73     | 0.64     | 0.607    | 0.675    |
| discred      |          |          |          |          |          |          |          |
| discrmed     | Factor 1 | 0.672    | 0.636    | 0.703    | 0.614    | 0.561    | 0.664    |
| discrpub     | Factor 1 | 0.863    | 0.842    | 0.882    | 0.821    | 0.777    | 0.858    |
| discrfam     | Factor 1 | 0.62     | 0.579    | 0.66     | 0.6      | 0.548    | 0.654    |
| workspeed    | Factor 2 | 0.851    | 0.828    | 0.871    | 0.909    | 0.883    | 0.934    |
| workrep      | Factor 2 | 0.787    | 0.763    | 0.81     | 0.875    | 0.842    | 0.905    |
| workemot     | Factor 2 | 0.79     | 0.764    | 0.814    | 0.875    | 0.841    | 0.906    |
| workphys     | Factor 2 | 0.754    | 0.729    | 0.777    | 0.842    | 0.81     | 0.873    |
| timework     | Factor 2 | 0.526    | 0.489    | 0.562    | 0.487    | 0.437    | 0.54     |
| carephys     | Factor 3 | 0.947    | 0.936    | 0.957    | 0.937    | 0.91     | 0.961    |
| caremot      | Factor 3 | 0.97     | 0.959    | 0.98     | 0.944    | 0.918    | 0.967    |
| carefut      | Factor 3 | 0.894    | 0.876    | 0.912    | 0.895    | 0.855    | 0.929    |
| timecare     | Factor 3 | 0.625    | 0.587    | 0.667    | 0.471    | 0.383    | 0.575    |
| riskgen      | Factor 4 | 0.849    | 0.811    | 0.886    | 0.758    | 0.678    | 0.835    |
| riskfinan    | Factor 4 | 0.673    | 0.637    | 0.708    | 0.608    | 0.548    | 0.663    |
| riskrecrea   | Factor 4 | 0.613    | 0.577    | 0.648    | 0.559    | 0.5      | 0.619    |
| socsuplove   | Factor 5 | 0.963    | 0.915    | 1.013    | 0.946    | 0.877    | 1.015    |
| socsupchores | Factor 5 | 0.588    | 0.562    | 0.611    | 0.584    | 0.545    | 0.617    |
| commfriend   | Factor 6 | 0.533    | 0.481    | 0.584    | 0.535    | 0.471    | 0.604    |
| exprfriend   | Factor 6 | 0.765    | 0.709    | 0.818    | 0.768    | 0.688    | 0.846    |
| exprother    | Factor 6 | 0.555    | 0.509    | 0.602    | 0.587    | 0.522    | 0.644    |
| indepprob    | Factor 7 | 0.866    | 0.776    | 0.969    | 0.731    | 0.62     | 0.861    |
| indepgen     | Factor 7 | 0.691    | 0.606    | 0.772    | 0.673    | 0.58     | 0.763    |

Note: The 95% confidence intervals were based on 2000 bootstrap samples

**Table S18.** Factor loadings for final CFA in samples 2 and 3 (Metric invariance, 25 items).

| Item         |          | Sample 2 | CI Lower | CI Upper | Sample 3 | CI Lower | CI Upper |
|--------------|----------|----------|----------|----------|----------|----------|----------|
| discrgen     | Factor 1 | 0.847    | 0.82     | 0.87     | 0.819    | 0.742    | 0.875    |
| discrhire    | Factor 1 | 0.705    | 0.671    | 0.738    | 0.707    | 0.667    | 0.746    |
| discred      | Factor 1 | 0.732    | 0.699    | 0.763    | 0.696    | 0.65     | 0.74     |
| discrmed     | Factor 1 | 0.691    | 0.655    | 0.724    | 0.615    | 0.54     | 0.679    |
| discrpub     | Factor 1 | 0.867    | 0.847    | 0.883    | 0.796    | 0.719    | 0.856    |
| discrfam     | Factor 1 | 0.621    | 0.579    | 0.661    | 0.591    | 0.521    | 0.658    |
| workspeed    | Factor 2 | 0.85     | 0.826    | 0.871    | 0.896    | 0.869    | 0.925    |
| workrep      | Factor 2 | 0.783    | 0.757    | 0.807    | 0.847    | 0.809    | 0.882    |
| workemot     | Factor 2 | 0.794    | 0.769    | 0.818    | 0.862    | 0.823    | 0.899    |
| workphys     | Factor 2 | 0.758    | 0.733    | 0.781    | 0.826    | 0.79     | 0.861    |
| timework     | Factor 2 | 0.509    | 0.469    | 0.546    | 0.464    | 0.413    | 0.52     |
| carephys     | Factor 3 | 0.947    | 0.936    | 0.957    | 0.946    | 0.916    | 0.972    |
| caremot      | Factor 3 | 0.971    | 0.96     | 0.98     | 0.939    | 0.911    | 0.965    |
| carefut      | Factor 3 | 0.894    | 0.875    | 0.911    | 0.885    | 0.839    | 0.927    |
| timecare     | Factor 3 | 0.627    | 0.587    | 0.668    | 0.49     | 0.4      | 0.604    |
| riskgen      | Factor 4 | 0.848    | 0.809    | 0.886    | 0.736    | 0.642    | 0.829    |
| riskfinan    | Factor 4 | 0.675    | 0.637    | 0.711    | 0.594    | 0.52     | 0.659    |
| riskrecrea   | Factor 4 | 0.613    | 0.573    | 0.649    | 0.534    | 0.464    | 0.6      |
| socsuplove   | Factor 5 | 0.967    | 0.923    | 1.017    | 0.964    | 0.889    | 1.039    |
| socsupchores | Factor 5 | 0.586    | 0.558    | 0.609    | 0.584    | 0.537    | 0.62     |
| commfriend   | Factor 6 | 0.525    | 0.471    | 0.58     | 0.508    | 0.438    | 0.578    |
| exprfriend   | Factor 6 | 0.764    | 0.71     | 0.819    | 0.751    | 0.656    | 0.84     |
| exprother    | Factor 6 | 0.562    | 0.515    | 0.607    | 0.563    | 0.493    | 0.635    |
| indepprob    | Factor 7 | 0.837    | 0.749    | 0.932    | 0.705    | 0.603    | 0.812    |
| indepgen     | Factor 7 | 0.717    | 0.643    | 0.795    | 0.697    | 0.598    | 0.794    |

Note: The 95% confidence intervals were based on 2000 bootstrap samples

**Table S19.** Factor loadings for final CFA samples 2 and 3 (Scalar invariance, 25 items).

| Item         |          | Sample 2 | CI Lower | CI Upper | Sample 3 | CI Lower | CI Upper |
|--------------|----------|----------|----------|----------|----------|----------|----------|
| discrgen     | Factor 1 | 0.846    | 0.819    | 0.869    | 0.815    | 0.731    | 0.876    |
| discrhire    | Factor 1 | 0.707    | 0.674    | 0.74     | 0.674    | 0.634    | 0.717    |
| discred      | Factor 1 | 0.732    | 0.7      | 0.764    | 0.683    | 0.638    | 0.73     |
| discrmed     | Factor 1 | 0.691    | 0.655    | 0.724    | 0.618    | 0.543    | 0.681    |
| discrpub     | Factor 1 | 0.866    | 0.847    | 0.883    | 0.797    | 0.715    | 0.859    |
| discrfam     | Factor 1 | 0.621    | 0.579    | 0.662    | 0.595    | 0.527    | 0.661    |
| workspeed    | Factor 2 | 0.85     | 0.827    | 0.871    | 0.899    | 0.87     | 0.929    |
| workrep      | Factor 2 | 0.785    | 0.759    | 0.808    | 0.841    | 0.804    | 0.876    |
| workemot     | Factor 2 | 0.792    | 0.767    | 0.816    | 0.862    | 0.821    | 0.9      |
| workphys     | Factor 2 | 0.758    | 0.733    | 0.781    | 0.83     | 0.793    | 0.866    |
| timework     | Factor 2 | 0.508    | 0.468    | 0.545    | 0.468    | 0.416    | 0.523    |
| carephys     | Factor 3 | 0.947    | 0.936    | 0.957    | 0.945    | 0.915    | 0.972    |
| caremot      | Factor 3 | 0.971    | 0.96     | 0.98     | 0.939    | 0.911    | 0.966    |
| carefut      | Factor 3 | 0.894    | 0.875    | 0.911    | 0.885    | 0.839    | 0.927    |
| timecare     | Factor 3 | 0.627    | 0.587    | 0.668    | 0.49     | 0.4      | 0.605    |
| riskgen      | Factor 4 | 0.849    | 0.81     | 0.888    | 0.73     | 0.632    | 0.825    |
| riskfinan    | Factor 4 | 0.673    | 0.635    | 0.709    | 0.594    | 0.52     | 0.659    |
| riskrecrea   | Factor 4 | 0.613    | 0.574    | 0.65     | 0.539    | 0.469    | 0.604    |
| socsuplove   | Factor 5 | 0.966    | 0.921    | 1.016    | 0.964    | 0.891    | 1.038    |
| socsupchores | Factor 5 | 0.586    | 0.559    | 0.61     | 0.588    | 0.543    | 0.626    |
| commfriend   | Factor 6 | 0.527    | 0.474    | 0.581    | 0.525    | 0.454    | 0.596    |
| exprfriend   | Factor 6 | 0.765    | 0.711    | 0.819    | 0.76     | 0.669    | 0.845    |
| exprother    | Factor 6 | 0.56     | 0.513    | 0.605    | 0.579    | 0.51     | 0.647    |
| indepprob    | Factor 7 | 0.848    | 0.762    | 0.946    | 0.705    | 0.597    | 0.819    |
| indepgen     | Factor 7 | 0.707    | 0.631    | 0.787    | 0.685    | 0.585    | 0.784    |

Note: The 95% confidence intervals were based on 2000 bootstrap samples

**Table S20.** Correlations between the factors in samples 1, 2 and 3.

| <b>Sample 1</b>        | Independent | Emotional Intelligence | Social Support | Risk-taking | Caregiver strain | Work strain | Discrimination |
|------------------------|-------------|------------------------|----------------|-------------|------------------|-------------|----------------|
| Independent            | 1,000       |                        |                |             |                  |             |                |
| Emotional Intelligence | -0.101      | 1.000                  |                |             |                  |             |                |
| Social Support         | -0.105      | 0.364                  | 1.000          |             |                  |             |                |
| Risk-taking            | 0.256       | 0.236                  | 0.145          | .,000       |                  |             |                |
| Caregiver strain       | 0.071       | 0.133                  | 0.101          | 0.043       | 1.000            |             |                |
| Work strain            | 0.151       | 0.129                  | 0.032          | 0.219       | 0.105            | 1.000       |                |
| Discrimination         | 0.031       | 0.207                  | 0.021          | 0.049       | 0.13             | 0.094       | 1.000          |
| <b>Sample 2</b>        | Independent | Emotional Intelligence | Social Support | Risk-taking | Caregiver strain | Work strain | Discrimination |
| Independent            | 1.000       |                        |                |             |                  |             |                |
| Emotional Intelligence | -0.196      | 1.000                  |                |             |                  |             |                |
| Social Support         | -0.077      | 0.314                  | 1.000          |             |                  |             |                |
| Risk-taking            | 0.174       | 0.18                   | 0.149          | 1.000       |                  |             |                |
| Caregiver strain       | 0.058       | 0.055                  | 0.036          | 0.032       | 1.000            |             |                |
| Work strain            | 0.105       | 0.076                  | 0.036          | 0.133       | 0.101            | 1.000       |                |
| Discrimination         | -0.087      | 0.182                  | -0.053         | 0.001       | 0.132            | 0.108       | 1.000          |
| <b>Sample 3</b>        | Independent | Emotional Intelligence | Social Support | Risk-taking | Caregiver strain | Work strain | Discrimination |
| Independent            | 1.000       |                        |                |             |                  |             |                |
| Emotional Intelligence | -.261       | 1.000                  |                |             |                  |             |                |
| Social Support         | -.224       | .340                   | 1.000          |             |                  |             |                |
| Risk-taking            | .104        | .194                   | .009           | 1.000       |                  |             |                |
| Caregiver strain       | -.076       | .055                   | .041           | -.048       | 1.000            |             |                |
| Work strain            | .089        | .065                   | -.010          | -.027       | .108             | 1.000       |                |
| Discrimination         | .012        | .118                   | .033           | -.018       | .220             | .068        | 1.000          |

Note: Sample 1= 2009, Sample 2=2054, Sample 3= 449. The discrimination variable in sample 3 was computed without the discred variable.

**Table S21.** Negative binomial regression predicting number of days with poor physical health (during past 30 days) (with gender identity as covariate).

|                                                          | <i>SAMPLE 1</i> |           |           | <i>SAMPLE 2</i> |           |           |
|----------------------------------------------------------|-----------------|-----------|-----------|-----------------|-----------|-----------|
|                                                          | Incidence ratio | rate      | 95% CI    | Incidence ratio | rate      | 95% CI    |
| Caregiver strain                                         |                 | 1.20      | 1.12 1.29 |                 | 1.11      | 1.04 1.18 |
| Work strain                                              |                 | 0.96      | 0.88 1.05 |                 | 1.01      | 0.93 1.10 |
| Independence                                             |                 | 0.93      | 0.85 1.01 |                 | 0.85      | 0.75 0.95 |
| Risk-taking                                              |                 | 0.95      | 0.87 1.04 |                 | 1.00      | 0.92 1.08 |
| Emotional intelligence                                   |                 | 0.93      | 0.85 1.03 |                 | 0.92      | 0.85 1.01 |
| Social support                                           |                 | 0.95      | 0.89 1.03 |                 | 0.94      | 0.89 1.00 |
| Discrimination                                           |                 | 1.45      | 1.33 1.58 |                 | 1.43      | 1.31 1.57 |
| Year of birth                                            |                 | 0.99      | 0.98 1.00 |                 | 0.99      | 0.98 0.99 |
| Personal Income (\$10,000-\$19,999)                      |                 | 1.02      | 0.80 1.29 |                 | 1.07      | 0.86 1.33 |
| Personal Income (\$20,000-\$29,999)                      |                 | 0.94      | 0.73 1.21 |                 | 1.01      | 0.81 1.25 |
| Personal Income (\$30,000-\$39,999)                      |                 | 0.84      | 0.64 1.10 |                 | 0.87      | 0.68 1.11 |
| Personal Income (\$40,000-\$49,999)                      |                 | 1.01      | 0.76 1.33 |                 | 0.71      | 0.56 0.91 |
| Personal Income (\$50,000-\$59,999)                      |                 | 0.93      | 0.68 1.27 |                 | 0.68      | 0.50 0.92 |
| Personal Income (\$60,000-\$69,999)                      |                 | 0.83      | 0.60 1.16 |                 | 0.70      | 0.52 0.95 |
| Personal Income (\$70,000-\$79,999)                      |                 | 0.82      | 0.54 1.23 |                 | 0.61      | 0.44 0.85 |
| Personal Income (\$80,000-\$89,999)                      |                 | 0.65      | 0.41 1.02 |                 | 0.45      | 0.32 0.62 |
| Personal Income (\$90,000-\$99,999)                      |                 | 1.03      | 0.56 1.92 |                 | 0.80      | 0.54 1.19 |
| Personal Income (\$100,000-\$149,999)                    |                 | 0.78      | 0.52 1.17 |                 | 0.67      | 0.47 0.96 |
| Personal Income (More than \$150,000)                    |                 | 1.36      | 0.88 2.10 |                 | 0.55      | 0.29 1.03 |
| Educational Level (High school graduate)                 |                 | 1.04      | 0.64 1.70 |                 | 0.88      | 0.50 1.55 |
| Educational Level (Some college credit, no degree)       |                 | 0.88      | 0.55 1.40 |                 | 1.12      | 0.65 1.92 |
| Educational Level (Trade/Technical/Vocational education) |                 | 0.86      | 0.48 1.54 |                 | 0.83      | 0.46 1.51 |
| Educational Level (Associate degree)                     |                 | 0.79      | 0.48 1.30 |                 | 1.00      | 0.58 1.74 |
| Educational Level (Bachelor's degree)                    |                 | 0.75      | 0.47 1.20 |                 | 0.85      | 0.50 1.46 |
| Educational Level (Master's degree)                      |                 | 0.89      | 0.54 1.48 |                 | 0.84      | 0.48 1.48 |
| Educational Level (professional degree)                  |                 | 0.71      | 0.24 2.05 |                 | 0.92      | 0.43 1.95 |
| Educational Level (Doctorate degree)                     |                 | 0.68      | 0.37 1.25 |                 | 0.69      | 0.35 1.33 |
| Ethnicity (White)                                        |                 | 1.02      | 0.77 1.36 |                 | 0.96      | 0.74 1.24 |
| Ethnicity (Hispanic, Latinx, Spanish)                    |                 | 0.98      | 0.71 1.37 |                 | 0.96      | 0.70 1.31 |
| Ethnicity (Black, African American)                      |                 | 0.94      | 0.67 1.30 |                 | 0.86      | 0.66 1.12 |
| Ethnicity (Asian)                                        |                 | 0.83      | 0.60 1.15 |                 | 0.87      | 0.61 1.24 |
| Ethnicity (Native)                                       |                 | 0.91      | 0.67 1.24 |                 | 1.64      | 1.12 2.41 |
| Woman                                                    |                 | 0.95      | 0.82 1.11 |                 | 0.93      | 0.80 1.07 |
| Non-binary/Gender fluid + Gender=other                   |                 | 0.96      | 0.58 1.60 |                 | 0.44      | 0.17 1.15 |
| <b>Goodness of Fit</b>                                   |                 |           |           |                 |           |           |
| Deviance/df                                              |                 | 1.114     |           |                 | 1.120     |           |
| Pearson Chi-Square/df                                    |                 | 1.240     |           |                 | 1.159     |           |
| Loglikelihood                                            |                 | -4848.379 |           |                 | -5161.248 |           |
| AIC                                                      |                 | 9768.758  |           |                 | 10394.496 |           |
| <b>Omnibus tests</b>                                     |                 |           |           |                 |           |           |
| Chi-square                                               |                 | 183.600   |           |                 | 204.826   |           |
| df                                                       |                 | 34        |           |                 | 34        |           |
| N                                                        |                 | 1881      |           |                 | 2008      |           |

Note: Participants reporting Native Hawaiian/Pacific Islander, Middle east/North Africa or Other as ethnicity are the reference group for the ethnicity variables. Personal Income < \$10,000 is the reference group for the "Personal Income" variables. Educational level < high school diploma is the reference group for the "Educational Level" variables. The models are computed with robust covariance matrix estimation.

**Table S22.** Negative Binomial regression predicting number of days with poor mental health (during past 30 days) (with gender identity as covariate).

|                                                          | <i>SAMPLE 1</i> |           |           | <i>SAMPLE 2</i> |           |           |
|----------------------------------------------------------|-----------------|-----------|-----------|-----------------|-----------|-----------|
|                                                          | Incidence ratio | rate      | 95% CI    | Incidence ratio | rate      | 95% CI    |
| Caregiver strain                                         |                 | 1.21      | 1.15 1.27 |                 | 1.20      | 1.14 1.27 |
| Work strain                                              |                 | 1.03      | 0.96 1.11 |                 | 1.12      | 1.04 1.21 |
| Independence                                             |                 | 0.98      | 0.91 1.04 |                 | 0.83      | 0.74 0.93 |
| Risk-taking                                              |                 | 0.86      | 0.80 0.93 |                 | 0.99      | 0.91 1.08 |
| Emotional intelligence                                   |                 | 0.97      | 0.90 1.05 |                 | 0.86      | 0.79 0.94 |
| Social support                                           |                 | 0.86      | 0.81 0.90 |                 | 0.81      | 0.76 0.86 |
| Discrimination                                           |                 | 1.42      | 1.33 1.51 |                 | 1.36      | 1.24 1.49 |
| Year of birth                                            |                 | 1.02      | 1.01 1.02 |                 | 1.02      | 1.01 1.02 |
| Personal Income (\$10,000-\$19,999)                      |                 | 0.98      | 0.82 1.16 |                 | 1.03      | 0.84 1.25 |
| Personal Income (\$20,000-\$29,999)                      |                 | 0.75      | 0.62 0.91 |                 | 0.89      | 0.71 1.10 |
| Personal Income (\$30,000-\$39,999)                      |                 | 0.78      | 0.63 0.96 |                 | 0.85      | 0.68 1.05 |
| Personal Income (\$40,000-\$49,999)                      |                 | 0.76      | 0.62 0.95 |                 | 0.63      | 0.50 0.80 |
| Personal Income (\$50,000-\$59,999)                      |                 | 0.81      | 0.65 1.01 |                 | 0.51      | 0.38 0.68 |
| Personal Income (\$60,000-\$69,999)                      |                 | 0.72      | 0.56 0.92 |                 | 0.54      | 0.40 0.73 |
| Personal Income (\$70,000-\$79,999)                      |                 | 0.69      | 0.50 0.96 |                 | 0.55      | 0.39 0.76 |
| Personal Income (\$80,000-\$89,999)                      |                 | 0.75      | 0.52 1.08 |                 | 0.77      | 0.47 1.26 |
| Personal Income (\$90,000-\$99,999)                      |                 | 0.98      | 0.66 1.45 |                 | 0.61      | 0.38 0.97 |
| Personal Income (\$100,000-\$149,999)                    |                 | 0.59      | 0.42 0.82 |                 | 0.62      | 0.44 0.88 |
| Personal Income (More than \$150,000)                    |                 | 1.00      | 0.67 1.48 |                 | 0.43      | 0.25 0.74 |
| Educational Level (High school graduate)                 |                 | 1.06      | 0.72 1.58 |                 | 1.50      | 0.86 2.61 |
| Educational Level (Some college credit, no degree)       |                 | 1.04      | 0.72 1.52 |                 | 1.68      | 0.98 2.85 |
| Educational Level (Trade/Technical/Vocational education) |                 | 1.15      | 0.73 1.81 |                 | 1.90      | 1.03 3.53 |
| Educational Level (Associate degree)                     |                 | 1.01      | 0.67 1.52 |                 | 1.61      | 0.93 2.77 |
| Educational Level (Bachelor's degree)                    |                 | 0.88      | 0.61 1.28 |                 | 1.53      | 0.90 2.60 |
| Educational Level (Master's degree)                      |                 | 1.07      | 0.72 1.59 |                 | 1.61      | 0.92 2.81 |
| Educational Level (professional degree)                  |                 | 0.71      | 0.36 1.41 |                 | 1.84      | 0.90 3.77 |
| Educational Level (Doctorate degree)                     |                 | 0.91      | 0.57 1.46 |                 | 1.74      | 0.87 3.48 |
| Ethnicity (White)                                        |                 | 1.53      | 1.24 1.89 |                 | 1.32      | 1.00 1.73 |
| Ethnicity (Hispanic, Latinx, Spanish)                    |                 | 1.06      | 0.85 1.32 |                 | 1.10      | 0.83 1.47 |
| Ethnicity (Black, African American)                      |                 | 1.27      | 1.00 1.62 |                 | 0.94      | 0.71 1.24 |
| Ethnicity (Asian)                                        |                 | 1.13      | 0.88 1.45 |                 | 1.08      | 0.75 1.54 |
| Ethnicity (Native)                                       |                 | 1.06      | 0.80 1.41 |                 | 1.88      | 1.27 2.79 |
| Woman                                                    |                 | 0.95      | 0.84 1.07 |                 | 1.20      | 1.04 1.39 |
| Non-binary/Gender fluid + Gender=other                   |                 | 1.24      | 0.96 1.61 |                 | 0.92      | 0.43 1.98 |
| <b>Goodness of Fit</b>                                   |                 |           |           |                 |           |           |
| Deviance/df                                              |                 | 1.173     |           |                 | 1.131     |           |
| Pearson Chi-Square/df                                    |                 | 1.016     |           |                 | 1.106     |           |
| Loglikelihood                                            |                 | -5669.909 |           |                 | -5571.861 |           |
| AIC                                                      |                 | 11411.818 |           |                 | 11215.721 |           |
| <b>Omnibus tests</b>                                     |                 |           |           |                 |           |           |
| Chi-square                                               |                 | 285.752   |           |                 | 316.349   |           |
| df                                                       |                 | 34        |           |                 | 34        |           |
| N                                                        |                 | 1883      |           |                 | 2005      |           |

Note: Participants reporting Native Hawaiian/Pacific Islander, Middle east/North Africa or Other as ethnicity are the reference group for the ethnicity variables. Personal Income < \$10,000 is the reference group for the "Personal Income" variables. Educational level < high school diploma is the reference group for the "Educational Level" variables. The models are computed with robust covariance matrix estimation.

**Table S23.** Negative binomial regression predicting number of days where poor mental or physical health prevented the respondent from doing usual activities (during past 30 days) (with gender identity as covariate).

|                                                          | <i>SAMPLE 1</i> |           |           | <i>SAMPLE 2</i> |           |           |
|----------------------------------------------------------|-----------------|-----------|-----------|-----------------|-----------|-----------|
|                                                          | Incidence ratio | rate      | 95% CI    | Incidence ratio | rate      | 95% CI    |
| Caregiver strain                                         |                 | 1.13      | 1.05 1.22 |                 | 1.10      | 1.02 1.19 |
| Work strain                                              |                 | 0.88      | 0.80 0.97 |                 | 0.98      | 0.90 1.08 |
| Independence                                             |                 | 1.02      | 0.94 1.12 |                 | 0.88      | 0.77 1.01 |
| Risk-taking                                              |                 | 0.93      | 0.85 1.02 |                 | 1.02      | 0.93 1.11 |
| Emotional intelligence                                   |                 | 0.99      | 0.89 1.10 |                 | 0.92      | 0.83 1.01 |
| Social support                                           |                 | 0.92      | 0.86 0.99 |                 | 0.87      | 0.81 0.94 |
| Discrimination                                           |                 | 1.74      | 1.59 1.90 |                 | 1.57      | 1.41 1.74 |
| Year of birth                                            |                 | 1.01      | 1.00 1.01 |                 | 1.00      | 1.00 1.01 |
| Personal Income (\$10,000-\$19,999)                      |                 | 1.01      | 0.80 1.27 |                 | 0.90      | 0.70 1.16 |
| Personal Income (\$20,000-\$29,999)                      |                 | 0.90      | 0.70 1.16 |                 | 0.92      | 0.72 1.17 |
| Personal Income (\$30,000-\$39,999)                      |                 | 0.76      | 0.56 1.02 |                 | 0.77      | 0.59 1.01 |
| Personal Income (\$40,000-\$49,999)                      |                 | 0.92      | 0.68 1.23 |                 | 0.65      | 0.48 0.87 |
| Personal Income (\$50,000-\$59,999)                      |                 | 0.76      | 0.56 1.04 |                 | 0.52      | 0.37 0.73 |
| Personal Income (\$60,000-\$69,999)                      |                 | 0.63      | 0.44 0.90 |                 | 0.68      | 0.47 0.97 |
| Personal Income (\$70,000-\$79,999)                      |                 | 0.67      | 0.42 1.05 |                 | 0.62      | 0.43 0.89 |
| Personal Income (\$80,000-\$89,999)                      |                 | 0.99      | 0.57 1.70 |                 | 0.64      | 0.40 1.03 |
| Personal Income (\$90,000-\$99,999)                      |                 | 1.00      | 0.51 1.95 |                 | 0.70      | 0.44 1.11 |
| Personal Income (\$100,000-\$149,999)                    |                 | 0.91      | 0.58 1.42 |                 | 0.70      | 0.46 1.06 |
| Personal Income (More than \$150,000)                    |                 | 1.57      | 0.95 2.60 |                 | 0.75      | 0.38 1.47 |
| Educational Level (High school graduate)                 |                 | 1.07      | 0.64 1.78 |                 | 0.99      | 0.51 1.92 |
| Educational Level (Some college credit, no degree)       |                 | 0.85      | 0.52 1.39 |                 | 1.14      | 0.61 2.13 |
| Educational Level (Trade/Technical/Vocational education) |                 | 1.32      | 0.74 2.36 |                 | 0.81      | 0.40 1.65 |
| Educational Level (Associate degree)                     |                 | 0.82      | 0.48 1.40 |                 | 0.96      | 0.51 1.82 |
| Educational Level (Bachelor's degree)                    |                 | 0.87      | 0.53 1.41 |                 | 0.77      | 0.42 1.44 |
| Educational Level (Master's degree)                      |                 | 0.72      | 0.43 1.22 |                 | 0.70      | 0.37 1.33 |
| Educational Level (professional degree)                  |                 | 0.24      | 0.10 0.56 |                 | 0.51      | 0.22 1.18 |
| Educational Level (Doctorate degree)                     |                 | 0.64      | 0.36 1.15 |                 | 0.61      | 0.28 1.31 |
| Ethnicity (White)                                        |                 | 1.11      | 0.84 1.48 |                 | 0.89      | 0.65 1.21 |
| Ethnicity (Hispanic, Latinx, Spanish)                    |                 | 0.88      | 0.66 1.18 |                 | 1.00      | 0.70 1.43 |
| Ethnicity (Black, African American)                      |                 | 0.99      | 0.72 1.37 |                 | 0.76      | 0.54 1.06 |
| Ethnicity (Asian)                                        |                 | 0.77      | 0.56 1.05 |                 | 0.85      | 0.56 1.31 |
| Ethnicity (Native)                                       |                 | 0.93      | 0.62 1.39 |                 | 2.03      | 1.26 3.28 |
| Woman                                                    |                 | 0.88      | 0.74 1.03 |                 | 1.09      | 0.92 1.29 |
| Non-binary/Gender fluid + Gender=other                   |                 | 1.30      | 0.82 2.04 |                 | 0.62      | 0.16 2.45 |
| <b>Goodness of Fit</b>                                   |                 |           |           |                 |           |           |
| Deviance/df                                              |                 | 1.081     |           |                 | 1.057     |           |
| Pearson Chi-Square/df                                    |                 | 1.165     |           |                 | 1.148     |           |
| Loglikelihood                                            |                 | -4584.605 |           |                 | -4640.077 |           |
| AIC                                                      |                 | 9241.210  |           |                 | 9352.154  |           |
| <b>Omnibus tests</b>                                     |                 |           |           |                 |           |           |
| Chi-square                                               |                 | 250.517   |           |                 | 222.470   |           |
| df                                                       |                 | 34        |           |                 | 34        |           |
| N                                                        |                 | 1879      |           |                 | 2007      |           |

Note: Participants reporting Native Hawaiian/Pacific Islander, Middle east/North Africa or Other as ethnicity are the reference group for the ethnicity variables. Personal Income < \$10,000 is the reference group for the "Personal Income" variables. Educational level < high school diploma is the reference group for the "Educational Level" variables. The models are computed with robust covariance matrix estimation.



**Table S24.** Logistic regression predicting general health status (excellent, very good, good= 0, fair, poor= 1) (with gender identity as covariate)

|                                                          | <i>SAMPLE 1</i> |          |           | <i>SAMPLE 2</i> |          |           |
|----------------------------------------------------------|-----------------|----------|-----------|-----------------|----------|-----------|
|                                                          | Incidence ratio | rate     | 95% CI    | Incidence ratio | rate     | 95% CI    |
| Caregiver strain                                         |                 | 1.28     | 1.12 1.47 |                 | 1.17     | 1.03 1.34 |
| Work strain                                              |                 | 0.87     | 0.73 1.05 |                 | 0.99     | 0.83 1.17 |
| Independence                                             |                 | 0.91     | 0.77 1.06 |                 | 0.71     | 0.56 0.90 |
| Risk-taking                                              |                 | 0.56     | 0.47 0.67 |                 | 0.69     | 0.58 0.81 |
| Emotional intelligence                                   |                 | 0.92     | 0.76 1.11 |                 | 0.89     | 0.75 1.06 |
| Social support                                           |                 | 0.83     | 0.73 0.95 |                 | 0.78     | 0.69 0.88 |
| Discrimination                                           |                 | 1.43     | 1.18 1.73 |                 | 1.57     | 1.29 1.89 |
| Year of birth                                            |                 | 0.98     | 0.97 0.99 |                 | 0.98     | 0.97 0.99 |
| Personal Income (\$10,000-\$19,999)                      |                 | 0.79     | 0.52 1.20 |                 | 1.19     | 0.78 1.80 |
| Personal Income (\$20,000-\$29,999)                      |                 | 0.88     | 0.57 1.36 |                 | 0.83     | 0.54 1.28 |
| Personal Income (\$30,000-\$39,999)                      |                 | 0.61     | 0.37 1.02 |                 | 0.82     | 0.51 1.32 |
| Personal Income (\$40,000-\$49,999)                      |                 | 0.76     | 0.46 1.28 |                 | 0.62     | 0.37 1.04 |
| Personal Income (\$50,000-\$59,999)                      |                 | 0.62     | 0.37 1.05 |                 | 0.52     | 0.29 0.93 |
| Personal Income (\$60,000-\$69,999)                      |                 | 0.86     | 0.48 1.55 |                 | 0.78     | 0.41 1.49 |
| Personal Income (\$70,000-\$79,999)                      |                 | 0.61     | 0.28 1.32 |                 | 0.63     | 0.33 1.22 |
| Personal Income (\$80,000-\$89,999)                      |                 | 0.19     | 0.04 0.81 |                 | 0.52     | 0.20 1.33 |
| Personal Income (\$90,000-\$99,999)                      |                 | 0.30     | 0.06 1.51 |                 | 1.01     | 0.46 2.23 |
| Personal Income (\$100,000-\$149,999)                    |                 | 0.11     | 0.02 0.48 |                 | 0.60     | 0.30 1.20 |
| Personal Income (More than \$150,000)                    |                 | 0.09     | 0.01 0.71 |                 | 0.73     | 0.23 2.33 |
| Educational Level (High school graduate)                 |                 | 0.45     | 0.19 1.09 |                 | 0.84     | 0.28 2.54 |
| Educational Level (Some college credit, no degree)       |                 | 0.58     | 0.25 1.32 |                 | 0.93     | 0.32 2.68 |
| Educational Level (Trade/Technical/Vocational education) |                 | 0.56     | 0.19 1.60 |                 | 0.79     | 0.25 2.51 |
| Educational Level (Associate degree)                     |                 | 0.42     | 0.17 1.05 |                 | 1.01     | 0.34 2.96 |
| Educational Level (Bachelor's degree)                    |                 | 0.41     | 0.18 0.95 |                 | 0.50     | 0.17 1.45 |
| Educational Level (Master's degree)                      |                 | 0.47     | 0.19 1.15 |                 | 0.39     | 0.13 1.19 |
| Educational Level (professional degree)                  |                 | 0.35     | 0.06 2.04 |                 | 0.24     | 0.05 1.24 |
| Educational Level (Doctorate degree)                     |                 | 0.17     | 0.04 0.74 |                 | 0.63     | 0.17 2.35 |
| Ethnicity (White)                                        |                 | 1.95     | 1.08 3.53 |                 | 0.99     | 0.52 1.87 |
| Ethnicity (Hispanic, Latinx, Spanish)                    |                 | 0.83     | 0.42 1.63 |                 | 1.06     | 0.55 2.04 |
| Ethnicity (Black, African American)                      |                 | 2.31     | 1.20 4.42 |                 | 0.90     | 0.46 1.77 |
| Ethnicity (Asian)                                        |                 | 1.69     | 0.88 3.27 |                 | 0.76     | 0.32 1.82 |
| Ethnicity (Native)                                       |                 | 0.46     | 0.18 1.16 |                 | 0.86     | 0.38 1.97 |
| Woman                                                    |                 | 0.57     | 0.42 0.78 |                 | 0.65     | 0.48 0.87 |
| Non-binary/Gender fluid + Gender=other                   |                 | 1.08     | 0.40 2.93 |                 | 0.33     | 0.03 3.69 |
| <b>Goodness of Fit</b>                                   |                 |          |           |                 |          |           |
| Deviance/df                                              |                 | 0.826    |           |                 | 0.877    |           |
| Pearson Chi-Square/df                                    |                 | 1.015    |           |                 | 1.015    |           |
| Loglikelihood                                            |                 | -766.888 |           |                 | -867.561 |           |
| AIC                                                      |                 | 1603.776 |           |                 | 1805.123 |           |
| <b>Omnibus tests</b>                                     |                 |          |           |                 |          |           |
| Chi-square                                               |                 | 210.935  |           |                 | 191.691  |           |
| df                                                       |                 | 34       |           |                 | 34       |           |
| N                                                        |                 | 1891     |           |                 | 2013     |           |

Note: Participants reporting Native Hawaiian/Pacific Islander, Middle east/North Africa or Other as ethnicity are the reference group for the ethnicity variables. Personal Income < \$10,000 is the reference group for the "Personal Income" variables. Educational level < high school diploma is the reference group for the "Educational Level" variables. The models are computed with robust covariance matrix estimation.

**Table S25.** Logistic regression predicting vaping (not vaping=0, vaping=1) (with gender identity as covariate).

|                                                          | <i>SAMPLE 1</i> |          |            | <i>SAMPLE 2</i> |          |           |
|----------------------------------------------------------|-----------------|----------|------------|-----------------|----------|-----------|
|                                                          | Incidence ratio | rate     | 95% CI     | Incidence ratio | rate     | 95% CI    |
| Caregiver strain                                         |                 | 1.06     | 0.90 1.25  |                 | 1.10     | 0.93 1.29 |
| Work strain                                              |                 | 1.21     | 0.96 1.53  |                 | 1.29     | 1.05 1.59 |
| Independence                                             |                 | 1.18     | 0.96 1.45  |                 | 1.05     | 0.77 1.44 |
| Risk-taking                                              |                 | 1.18     | 0.97 1.45  |                 | 1.00     | 0.80 1.24 |
| Emotional intelligence                                   |                 | 1.39     | 1.12 1.72  |                 | 1.05     | 0.84 1.31 |
| Social support                                           |                 | 0.98     | 0.84 1.14  |                 | 0.89     | 0.76 1.04 |
| Discrimination                                           |                 | 1.40     | 1.16 1.70  |                 | 1.47     | 1.18 1.83 |
| Year of birth                                            |                 | 0.98     | 0.97 1.00  |                 | 1.01     | 1.00 1.03 |
| Personal Income (\$10,000-\$19,999)                      |                 | 1.89     | 0.95 3.76  |                 | 1.20     | 0.60 2.38 |
| Personal Income (\$20,000-\$29,999)                      |                 | 1.63     | 0.83 3.21  |                 | 1.65     | 0.87 3.11 |
| Personal Income (\$30,000-\$39,999)                      |                 | 2.56     | 1.34 4.90  |                 | 1.03     | 0.52 2.06 |
| Personal Income (\$40,000-\$49,999)                      |                 | 2.04     | 0.99 4.20  |                 | 1.08     | 0.52 2.21 |
| Personal Income (\$50,000-\$59,999)                      |                 | 2.41     | 1.21 4.80  |                 | 1.47     | 0.71 3.03 |
| Personal Income (\$60,000-\$69,999)                      |                 | 2.87     | 1.38 5.98  |                 | 1.30     | 0.57 2.98 |
| Personal Income (\$70,000-\$79,999)                      |                 | 1.65     | 0.72 3.78  |                 | 0.89     | 0.34 2.32 |
| Personal Income (\$80,000-\$89,999)                      |                 | 0.69     | 0.16 3.06  |                 | 1.02     | 0.31 3.30 |
| Personal Income (\$90,000-\$99,999)                      |                 | 4.67     | 1.84 11.85 |                 | 0.99     | 0.32 3.05 |
| Personal Income (\$100,000-\$149,999)                    |                 | 2.19     | 0.96 4.98  |                 | 0.90     | 0.35 2.30 |
| Personal Income (More than \$150,000)                    |                 | 7.25     | 3.29 16.00 |                 | 0.45     | 0.05 3.75 |
| Educational Level (High school graduate)                 |                 | 0.36     | 0.13 0.94  |                 | 0.85     | 0.16 4.60 |
| Educational Level (Some college credit, no degree)       |                 | 0.30     | 0.12 0.78  |                 | 0.81     | 0.16 4.19 |
| Educational Level (Trade/Technical/Vocational education) |                 | 0.38     | 0.11 1.33  |                 | 0.45     | 0.07 2.89 |
| Educational Level (Associate degree)                     |                 | 0.28     | 0.10 0.79  |                 | 1.18     | 0.23 6.08 |
| Educational Level (Bachelor's degree)                    |                 | 0.18     | 0.07 0.46  |                 | 0.66     | 0.13 3.38 |
| Educational Level (Master's degree)                      |                 | 0.26     | 0.10 0.69  |                 | 0.45     | 0.08 2.46 |
| Educational Level (professional degree)                  |                 | 0.30     | 0.06 1.42  |                 | 0.50     | 0.06 4.48 |
| Educational Level (Doctorate degree)                     |                 | 0.21     | 0.06 0.71  |                 | 0.49     | 0.06 4.41 |
| Ethnicity (White)                                        |                 | 1.69     | 0.93 3.05  |                 | 1.04     | 0.53 2.05 |
| Ethnicity (Hispanic, Latinx, Spanish)                    |                 | 1.18     | 0.60 2.30  |                 | 1.35     | 0.62 2.92 |
| Ethnicity (Black, African American)                      |                 | 1.47     | 0.70 3.12  |                 | 0.73     | 0.35 1.53 |
| Ethnicity (Asian)                                        |                 | 1.08     | 0.53 2.22  |                 | 0.73     | 0.28 1.86 |
| Ethnicity (Native)                                       |                 | 1.48     | 0.60 3.66  |                 | 1.66     | 0.69 4.01 |
| Woman                                                    |                 | 0.42     | 0.30 0.60  |                 | 0.74     | 0.50 1.09 |
| Non-binary/Gender fluid + Gender=other                   |                 | 0.44     | 0.09 2.23  |                 | 0.64     | 0.08 5.30 |
| <b>Goodness of Fit</b>                                   |                 |          |            |                 |          |           |
| Deviance/df                                              |                 | 0.822    |            |                 | 0.571    |           |
| Pearson Chi-Square/df                                    |                 | 1.034    |            |                 | 1.014    |           |
| Loglikelihood                                            |                 | -761.661 |            |                 | -564.438 |           |
| AIC                                                      |                 | 1593.322 |            |                 | 1198.877 |           |
| <b>Omnibus tests</b>                                     |                 |          |            |                 |          |           |
| Chi-square                                               |                 | 269.616  |            |                 | 60.175   |           |
| df                                                       |                 | 34       |            |                 | 34       |           |
| N                                                        |                 | 1888     |            |                 | 2012     |           |

Note: Participants reporting Native Hawaiian/Pacific Islander, Middle east/North Africa or Other as ethnicity are the reference group for the ethnicity variables. Personal Income < \$10,000 is the reference group for the "Personal Income" variables. Educational level < high school diploma is the reference group for the "Educational Level" variables. The models are computed with robust covariance matrix estimation.

**Table S26.** Logistic regression predicting smoking (not smoking=0, smoking=1) (with gender identity as covariate).

|                                                          | <i>SAMPLE 1</i> |         |        | <i>SAMPLE 2</i> |         |        |
|----------------------------------------------------------|-----------------|---------|--------|-----------------|---------|--------|
|                                                          | Incidence ratio | rate    | 95% CI | Incidence ratio | rate    | 95% CI |
| Caregiver strain                                         | 1.41            | 1.23    | 1.61   | 1.18            | 1.05    | 1.33   |
| Work strain                                              | 1.36            | 1.14    | 1.63   | 1.25            | 1.08    | 1.46   |
| Independence                                             | 1.22            | 1.03    | 1.46   | 1.07            | 0.85    | 1.35   |
| Risk-taking                                              | 1.43            | 1.20    | 1.71   | 1.06            | 0.92    | 1.23   |
| Emotional intelligence                                   | 1.46            | 1.22    | 1.75   | 1.12            | 0.96    | 1.30   |
| Social support                                           | 0.98            | 0.86    | 1.11   | 0.98            | 0.87    | 1.09   |
| Discrimination                                           | 1.11            | 0.92    | 1.33   | 1.17            | 0.98    | 1.39   |
| Year of birth                                            | 0.97            | 0.96    | 0.98   | 1.00            | 0.99    | 1.01   |
| Personal Income (\$10,000-\$19,999)                      | 1.06            | 0.64    | 1.74   | 1.24            | 0.81    | 1.89   |
| Personal Income (\$20,000-\$29,999)                      | 1.41            | 0.87    | 2.28   | 0.89            | 0.58    | 1.38   |
| Personal Income (\$30,000-\$39,999)                      | 0.83            | 0.47    | 1.44   | 1.18            | 0.75    | 1.85   |
| Personal Income (\$40,000-\$49,999)                      | 1.21            | 0.70    | 2.10   | 0.94            | 0.59    | 1.51   |
| Personal Income (\$50,000-\$59,999)                      | 1.13            | 0.64    | 1.99   | 0.88            | 0.53    | 1.46   |
| Personal Income (\$60,000-\$69,999)                      | 1.32            | 0.73    | 2.38   | 0.86            | 0.47    | 1.57   |
| Personal Income (\$70,000-\$79,999)                      | 1.18            | 0.60    | 2.34   | 1.04            | 0.58    | 1.86   |
| Personal Income (\$80,000-\$89,999)                      | 0.52            | 0.16    | 1.65   | 1.47            | 0.73    | 2.95   |
| Personal Income (\$90,000-\$99,999)                      | 1.96            | 0.85    | 4.54   | 0.62            | 0.28    | 1.39   |
| Personal Income (\$100,000-\$149,999)                    | 0.92            | 0.48    | 1.77   | 0.95            | 0.52    | 1.74   |
| Personal Income (More than \$150,000)                    | 4.58            | 2.24    | 9.40   | 0.38            | 0.12    | 1.20   |
| Educational Level (High school graduate)                 | 1.33            | 0.43    | 4.10   | 0.70            | 0.25    | 1.94   |
| Educational Level (Some college credit, no degree)       | 1.04            | 0.35    | 3.13   | 0.65            | 0.24    | 1.75   |
| Educational Level (Trade/Technical/Vocational education) | 1.73            | 0.50    | 6.00   | 1.00            | 0.35    | 2.90   |
| Educational Level (Associate degree)                     | 0.72            | 0.23    | 2.27   | 0.70            | 0.26    | 1.91   |
| Educational Level (Bachelor's degree)                    | 0.49            | 0.16    | 1.48   | 0.30            | 0.11    | 0.80   |
| Educational Level (Master's degree)                      | 0.45            | 0.14    | 1.41   | 0.23            | 0.08    | 0.66   |
| Educational Level (professional degree)                  | 0.44            | 0.08    | 2.29   | 0.32            | 0.08    | 1.26   |
| Educational Level (Doctorate degree)                     | 0.77            | 0.22    | 2.68   | 0.18            | 0.04    | 0.79   |
| Ethnicity (White)                                        | 1.40            | 0.70    | 2.79   | 0.69            | 0.39    | 1.23   |
| Ethnicity (Hispanic, Latinx, Spanish)                    | 0.94            | 0.51    | 1.75   | 0.44            | 0.23    | 0.85   |
| Ethnicity (Black, African American)                      | 0.84            | 0.37    | 1.91   | 0.41            | 0.22    | 0.78   |
| Ethnicity (Asian)                                        | 0.44            | 0.18    | 1.07   | 0.29            | 0.12    | 0.68   |
| Ethnicity (Native)                                       | 0.75            | 0.29    | 1.94   | 1.66            | 0.85    | 3.22   |
| Woman                                                    | 0.65            | 0.48    | 0.88   | 0.91            | 0.70    | 1.18   |
| Non-binary/Gender fluid + Gender=other                   | 0.18            | 0.02    | 1.38   | 0.28            | 0.04    | 1.87   |
| <b>Goodness of Fit</b>                                   |                 |         |        |                 |         |        |
| Deviance/df                                              |                 | 0.822   |        |                 | 1.007   |        |
| Pearson Chi-Square/df                                    |                 | 1.034   |        |                 | 1.007   |        |
| Loglikelihood                                            | -761.661        |         |        | -994.960        |         |        |
| AIC                                                      | 1593.322        |         |        | 2059.921        |         |        |
| <b>Omnibus tests</b>                                     |                 |         |        |                 |         |        |
| Chi-square                                               |                 | 269.616 |        |                 | 146.339 |        |
| df                                                       |                 | 34      |        |                 | 34      |        |
| N                                                        |                 | 1889    |        |                 | 2012    |        |

Note: Participants reporting Native Hawaiian/Pacific Islander, Middle east/North Africa or Other as ethnicity are the reference group for the ethnicity variables. Personal Income < \$10,000 is the reference group for the "Personal Income" variables. Educational level < high school diploma is the reference group for the "Educational Level" variables. The models are computed with robust covariance matrix estimation.

**Table S27.** Logistic regression predicting binge drinking (less than monthly=0, monthly, weekly, and daily=1) (with gender identity as covariate).

|                                                          | SAMPLE 1        |          |            | SAMPLE 2        |          |           |
|----------------------------------------------------------|-----------------|----------|------------|-----------------|----------|-----------|
|                                                          | Incidence ratio | rate     | 95% CI     | Incidence ratio | rate     | 95% CI    |
| Caregiver strain                                         |                 | 0.92     | 0.80 1.05  |                 | 0.91     | 0.80 1.04 |
| Work strain                                              |                 | 1.28     | 1.09 1.52  |                 | 1.03     | 0.88 1.21 |
| Independence                                             |                 | 1.08     | 0.93 1.24  |                 | 1.19     | 0.94 1.49 |
| Risk-taking                                              |                 | 1.53     | 1.31 1.78  |                 | 1.25     | 1.08 1.45 |
| Emotional intelligence                                   |                 | 1.18     | 1.00 1.40  |                 | 1.04     | 0.89 1.22 |
| Social support                                           |                 | 1.01     | 0.90 1.13  |                 | 0.87     | 0.78 0.97 |
| Discrimination                                           |                 | 1.17     | 0.99 1.37  |                 | 1.12     | 0.93 1.34 |
| Year of birth                                            |                 | 1.02     | 1.01 1.03  |                 | 1.03     | 1.02 1.04 |
| Personal Income (\$10,000-\$19,999)                      |                 | 1.03     | 0.65 1.62  |                 | 1.27     | 0.78 2.04 |
| Personal Income (\$20,000-\$29,999)                      |                 | 1.15     | 0.73 1.82  |                 | 1.94     | 1.23 3.06 |
| Personal Income (\$30,000-\$39,999)                      |                 | 1.20     | 0.76 1.90  |                 | 1.33     | 0.81 2.17 |
| Personal Income (\$40,000-\$49,999)                      |                 | 1.31     | 0.81 2.13  |                 | 1.79     | 1.08 2.96 |
| Personal Income (\$50,000-\$59,999)                      |                 | 0.93     | 0.56 1.53  |                 | 1.37     | 0.80 2.36 |
| Personal Income (\$60,000-\$69,999)                      |                 | 1.21     | 0.71 2.06  |                 | 1.98     | 1.11 3.55 |
| Personal Income (\$70,000-\$79,999)                      |                 | 0.83     | 0.45 1.54  |                 | 1.44     | 0.78 2.65 |
| Personal Income (\$80,000-\$89,999)                      |                 | 1.17     | 0.53 2.58  |                 | 1.15     | 0.52 2.57 |
| Personal Income (\$90,000-\$99,999)                      |                 | 1.68     | 0.73 3.86  |                 | 2.29     | 1.13 4.62 |
| Personal Income (\$100,000-\$149,999)                    |                 | 1.16     | 0.63 2.12  |                 | 1.93     | 1.05 3.57 |
| Personal Income (More than \$150,000)                    |                 | 2.08     | 1.04 4.16  |                 | 2.42     | 0.99 5.88 |
| Educational Level (High school graduate)                 |                 | 1.20     | 0.40 3.59  |                 | 0.50     | 0.15 1.65 |
| Educational Level (Some college credit, no degree)       |                 | 1.67     | 0.58 4.79  |                 | 0.90     | 0.29 2.82 |
| Educational Level (Trade/Technical/Vocational education) |                 | 2.37     | 0.71 7.93  |                 | 0.85     | 0.25 2.92 |
| Educational Level (Associate degree)                     |                 | 1.36     | 0.45 4.12  |                 | 0.65     | 0.20 2.09 |
| Educational Level (Bachelor's degree)                    |                 | 1.52     | 0.53 4.36  |                 | 0.63     | 0.20 1.97 |
| Educational Level (Master's degree)                      |                 | 1.80     | 0.62 5.28  |                 | 0.57     | 0.18 1.86 |
| Educational Level (professional degree)                  |                 | 3.24     | 0.77 13.57 |                 | 0.58     | 0.14 2.50 |
| Educational Level (Doctorate degree)                     |                 | 1.76     | 0.52 5.91  |                 | 0.65     | 0.15 2.73 |
| Ethnicity (White)                                        |                 | 1.89     | 1.08 3.30  |                 | 0.92     | 0.53 1.60 |
| Ethnicity (Hispanic, Latinx, Spanish)                    |                 | 1.64     | 0.96 2.79  |                 | 0.83     | 0.47 1.46 |
| Ethnicity (Black, African American)                      |                 | 0.75     | 0.36 1.54  |                 | 1.04     | 0.56 1.92 |
| Ethnicity (Asian)                                        |                 | 0.58     | 0.30 1.12  |                 | 0.54     | 0.27 1.08 |
| Ethnicity (Native)                                       |                 | 0.46     | 0.19 1.09  |                 | 0.79     | 0.38 1.64 |
| Woman                                                    |                 | 0.57     | 0.44 0.74  |                 |          |           |
| Non-binary/Gender fluid + Gender=other                   |                 | 0.53     | 0.18 1.56  |                 |          |           |
| Gender Dummy (woman=1)                                   |                 |          |            |                 | 0.78     | 0.60 1.03 |
| <b>Goodness of Fit</b>                                   |                 |          |            |                 |          |           |
| Deviance/df                                              |                 | 1.001    |            |                 | 0.571    |           |
| Pearson Chi-Square/df                                    |                 | 1.017    |            |                 | 1.014    |           |
| Loglikelihood                                            |                 | -923.706 |            |                 | -564.438 |           |
| AIC                                                      |                 | 1917.411 |            |                 | 1198.877 |           |
| <b>Omnibus tests</b>                                     |                 |          |            |                 |          |           |
| Chi-square                                               |                 | 212.582  |            |                 | 60.175   |           |
| df                                                       |                 | 34       |            |                 | 34       |           |
| N                                                        |                 | 1888     |            |                 | 2000     |           |

Note: Participants reporting Native Hawaiian/Pacific Islander, Middle east/North Africa or Other as ethnicity are the reference group for the ethnicity variables. Personal Income < \$10,000 is the reference group for the "Personal Income" variables. Educational level < high school diploma is the reference group for the "Educational Level" variables. It was not possible to estimate the effect of "Non-binary/Gender fluid + Gender=other" in Sample 2. Instead, we included a dichotomous gender variable (man=0, woman=1). The models are computed with robust covariance matrix estimation.

**Table S28.** Logistic regression predicting overweight (BMI<25=0, BMI≥25 =1) (with gender identity as covariate).

|                                                          | <i>SAMPLE 1</i>      |      |      | <i>SAMPLE 2</i> |      |      |
|----------------------------------------------------------|----------------------|------|------|-----------------|------|------|
|                                                          | Incidence rate ratio |      |      | 95% CI          |      |      |
| Caregiver strain                                         | 1.18                 | 1.05 | 1.31 | 1.27            | 1.14 | 1.41 |
| Work strain                                              | 1.04                 | 0.91 | 1.19 | 1.16            | 1.02 | 1.33 |
| Independence                                             | 0.99                 | 0.88 | 1.12 | 1.05            | 0.88 | 1.27 |
| Risk-taking                                              | 0.81                 | 0.72 | 0.93 | 0.86            | 0.76 | 0.97 |
| Emotional intelligence                                   | 0.99                 | 0.87 | 1.14 | 1.03            | 0.90 | 1.18 |
| Social support                                           | 0.99                 | 0.90 | 1.09 | 1.07            | 0.97 | 1.18 |
| Discrimination                                           | 1.22                 | 1.06 | 1.41 | 1.27            | 1.09 | 1.49 |
| Year of birth                                            | 0.98                 | 0.97 | 0.99 | 0.97            | 0.97 | 0.98 |
| Personal Income (\$10,000-\$19,999)                      | 1.14                 | 0.80 | 1.61 | 0.83            | 0.57 | 1.19 |
| Personal Income (\$20,000-\$29,999)                      | 1.23                 | 0.86 | 1.77 | 0.83            | 0.58 | 1.20 |
| Personal Income (\$30,000-\$39,999)                      | 1.16                 | 0.80 | 1.68 | 0.77            | 0.53 | 1.14 |
| Personal Income (\$40,000-\$49,999)                      | 1.19                 | 0.81 | 1.75 | 0.77            | 0.51 | 1.14 |
| Personal Income (\$50,000-\$59,999)                      | 1.51                 | 1.01 | 2.26 | 1.15            | 0.75 | 1.77 |
| Personal Income (\$60,000-\$69,999)                      | 1.33                 | 0.85 | 2.09 | 1.27            | 0.76 | 2.14 |
| Personal Income (\$70,000-\$79,999)                      | 1.32                 | 0.78 | 2.22 | 2.20            | 1.30 | 3.71 |
| Personal Income (\$80,000-\$89,999)                      | 1.20                 | 0.60 | 2.38 | 0.98            | 0.54 | 1.78 |
| Personal Income (\$90,000-\$99,999)                      | 1.98                 | 0.88 | 4.48 | 1.05            | 0.58 | 1.90 |
| Personal Income (\$100,000-\$149,999)                    | 1.06                 | 0.63 | 1.80 | 1.00            | 0.59 | 1.69 |
| Personal Income (More than \$150,000)                    | 1.26                 | 0.65 | 2.45 | 0.96            | 0.43 | 2.15 |
| Educational Level (High school graduate)                 | 0.86                 | 0.39 | 1.88 | 0.24            | 0.07 | 0.85 |
| Educational Level (Some college credit, no degree)       | 0.89                 | 0.41 | 1.90 | 0.32            | 0.09 | 1.10 |
| Educational Level (Trade/Technical/Vocational education) | 0.87                 | 0.34 | 2.25 | 0.21            | 0.06 | 0.76 |
| Educational Level (Associate degree)                     | 1.03                 | 0.46 | 2.34 | 0.23            | 0.07 | 0.81 |
| Educational Level (Bachelor's degree)                    | 0.58                 | 0.27 | 1.24 | 0.21            | 0.06 | 0.73 |
| Educational Level (Master's degree)                      | 0.76                 | 0.34 | 1.69 | 0.21            | 0.06 | 0.74 |
| Educational Level (professional degree)                  | 0.58                 | 0.18 | 1.80 | 0.13            | 0.03 | 0.52 |
| Educational Level (Doctorate degree)                     | 0.68                 | 0.26 | 1.77 | 0.13            | 0.03 | 0.51 |
| Ethnicity (White)                                        | 1.11                 | 0.72 | 1.71 | 1.02            | 0.63 | 1.66 |
| Ethnicity (Hispanic, Latinx, Spanish)                    | 1.31                 | 0.83 | 2.08 | 1.57            | 0.95 | 2.59 |
| Ethnicity (Black, African American)                      | 1.68                 | 1.01 | 2.79 | 1.14            | 0.66 | 1.96 |
| Ethnicity (Asian)                                        | 0.51                 | 0.31 | 0.83 | 0.52            | 0.29 | 0.93 |
| Ethnicity (Native)                                       | 2.11                 | 1.02 | 4.36 | 1.20            | 0.62 | 2.30 |
| Woman                                                    | 0.77                 | 0.62 | 0.97 | 0.58            | 0.47 | 0.73 |
| Non-binary/Gender fluid + Gender=other                   | 0.95                 | 0.44 | 2.08 | 0.35            | 0.06 | 2.17 |
| <b>Goodness of Fit</b>                                   |                      |      |      |                 |      |      |
| Deviance/df                                              | 1.315                |      |      | 1.283           |      |      |
| Pearson Chi-Square/df                                    | 1.020                |      |      | 1.019           |      |      |
| Loglikelihood                                            | -1202.188            |      |      | -1257.609       |      |      |
| AIC                                                      | 2474.377             |      |      | 2585.218        |      |      |
| <b>Omnibus tests</b>                                     |                      |      |      |                 |      |      |
| Chi-square                                               | 138.059              |      |      | 165.330         |      |      |
| df                                                       | 34                   |      |      | 34              |      |      |
| N                                                        | 1864                 |      |      | 1996            |      |      |

Note: Participants reporting Native Hawaiian/Pacific Islander, Middle east/North Africa or Other as ethnicity are the reference group for the ethnicity variables. Personal Income < \$10,000 is the reference group for the “Personal Income” variables. Educational level < high school diploma is the reference group for the “Educational Level” variables. The models are computed with robust covariance matrix estimation.

**Table S29.** Negative binomial regression predicting number of days with poor physical health (during past 30 days) (with sex as covariate).

|                                                          | <i>SAMPLE 1</i> |           |           | <i>SAMPLE 2</i> |           |           |
|----------------------------------------------------------|-----------------|-----------|-----------|-----------------|-----------|-----------|
|                                                          | Incidence ratio | rate      | 95% CI    | Incidence ratio | rate      | 95% CI    |
| Caregiver strain                                         |                 | 1.20      | 1.12 1.29 |                 | 1.11      | 1.04 1.18 |
| Work strain                                              |                 | 0.96      | 0.87 1.05 |                 | 1.02      | 0.94 1.11 |
| Independence                                             |                 | 0.93      | 0.85 1.01 |                 | 0.84      | 0.75 0.95 |
| Risk-taking                                              |                 | 0.95      | 0.87 1.04 |                 | 1.00      | 0.92 1.08 |
| Emotional intelligence                                   |                 | 0.93      | 0.84 1.03 |                 | 0.93      | 0.85 1.01 |
| Social support                                           |                 | 0.95      | 0.89 1.02 |                 | 0.94      | 0.89 1.00 |
| Discrimination                                           |                 | 1.46      | 1.34 1.59 |                 | 1.43      | 1.30 1.57 |
| Year of birth                                            |                 | 0.99      | 0.98 1.00 |                 | 0.99      | 0.98 0.99 |
| Personal Income (\$10,000-\$19,999)                      |                 | 1.01      | 0.79 1.29 |                 | 1.07      | 0.86 1.34 |
| Personal Income (\$20,000-\$29,999)                      |                 | 0.94      | 0.73 1.21 |                 | 1.01      | 0.82 1.25 |
| Personal Income (\$30,000-\$39,999)                      |                 | 0.83      | 0.64 1.09 |                 | 0.87      | 0.68 1.12 |
| Personal Income (\$40,000-\$49,999)                      |                 | 1.00      | 0.75 1.33 |                 | 0.71      | 0.56 0.91 |
| Personal Income (\$50,000-\$59,999)                      |                 | 0.92      | 0.67 1.26 |                 | 0.68      | 0.50 0.93 |
| Personal Income (\$60,000-\$69,999)                      |                 | 0.83      | 0.60 1.15 |                 | 0.70      | 0.52 0.95 |
| Personal Income (\$70,000-\$79,999)                      |                 | 0.81      | 0.54 1.22 |                 | 0.62      | 0.44 0.86 |
| Personal Income (\$80,000-\$89,999)                      |                 | 0.66      | 0.42 1.03 |                 | 0.45      | 0.32 0.63 |
| Personal Income (\$90,000-\$99,999)                      |                 | 1.03      | 0.55 1.91 |                 | 0.76      | 0.51 1.15 |
| Personal Income (\$100,000-\$149,999)                    |                 | 0.77      | 0.51 1.16 |                 | 0.68      | 0.48 0.96 |
| Personal Income (More than \$150,000)                    |                 | 1.26      | 0.81 1.95 |                 | 0.55      | 0.29 1.03 |
| Educational Level (High school graduate)                 |                 | 1.04      | 0.64 1.70 |                 | 0.88      | 0.50 1.55 |
| Educational Level (Some college credit, no degree)       |                 | 0.88      | 0.55 1.40 |                 | 1.11      | 0.65 1.90 |
| Educational Level (Trade/Technical/Vocational education) |                 | 0.87      | 0.49 1.55 |                 | 0.84      | 0.46 1.51 |
| Educational Level (Associate degree)                     |                 | 0.80      | 0.48 1.32 |                 | 1.00      | 0.58 1.74 |
| Educational Level (Bachelor's degree)                    |                 | 0.76      | 0.47 1.20 |                 | 0.85      | 0.50 1.46 |
| Educational Level (Master's degree)                      |                 | 0.90      | 0.54 1.48 |                 | 0.85      | 0.48 1.48 |
| Educational Level (professional degree)                  |                 | 0.72      | 0.25 2.10 |                 | 0.92      | 0.44 1.96 |
| Educational Level (Doctorate degree)                     |                 | 0.69      | 0.38 1.26 |                 | 0.69      | 0.36 1.33 |
| Ethnicity (White)                                        |                 | 1.07      | 0.80 1.43 |                 | 0.96      | 0.74 1.25 |
| Ethnicity (Hispanic, Latinx, Spanish)                    |                 | 1.01      | 0.72 1.40 |                 | 0.97      | 0.71 1.32 |
| Ethnicity (Black, African American)                      |                 | 0.97      | 0.70 1.35 |                 | 0.87      | 0.66 1.14 |
| Ethnicity (Asian)                                        |                 | 0.86      | 0.62 1.19 |                 | 0.88      | 0.62 1.26 |
| Ethnicity (Native)                                       |                 | 0.91      | 0.67 1.23 |                 | 1.62      | 1.11 2.38 |
| Sex (male=0, female=1)                                   |                 | 0.94      | 0.81 1.10 |                 | 0.93      | 0.80 1.08 |
| <b>Goodness of Fit</b>                                   |                 |           |           |                 |           |           |
| Deviance/df                                              |                 | 1.114     |           |                 | 1.120     |           |
| Pearson Chi-Square/df                                    |                 | 1.240     |           |                 | 1.159     |           |
| Loglikelihood                                            |                 | -4827.875 |           |                 | -5152.368 |           |
| AIC                                                      |                 | 9725.751  |           |                 | 10374.737 |           |
| <b>Omnibus tests</b>                                     |                 |           |           |                 |           |           |
| Chi-square                                               |                 | 179.945   |           |                 | 200.473   |           |
| df                                                       |                 | 33        |           |                 | 33        |           |
| N                                                        |                 | 1874      |           |                 | 2005      |           |

Note: Participants reporting Native Hawaiian/Pacific Islander, Middle east/North Africa or Other as ethnicity are the reference group for the ethnicity variables. Personal Income < \$10,000 is the reference group for the "Personal Income" variables. Educational level < high school diploma is the reference group for the "Educational Level" variables. The models are computed with robust covariance matrix estimation.

**Table S30.** Negative Binomial regression predicting number of days with poor mental health (during past 30 days) (with sex as covariate).

|                                                          | <i>SAMPLE 1</i> |           |           | <i>SAMPLE 2</i> |           |           |
|----------------------------------------------------------|-----------------|-----------|-----------|-----------------|-----------|-----------|
|                                                          | Incidence ratio | rate      | 95% CI    | Incidence ratio | rate      | 95% CI    |
| Caregiver strain                                         |                 | 1.21      | 1.14 1.27 |                 | 1.20      | 1.14 1.27 |
| Work strain                                              |                 | 1.03      | 0.96 1.11 |                 | 1.12      | 1.04 1.21 |
| Independence                                             |                 | 0.97      | 0.91 1.04 |                 | 0.83      | 0.74 0.94 |
| Risk-taking                                              |                 | 0.86      | 0.80 0.92 |                 | 0.99      | 0.91 1.08 |
| Emotional intelligence                                   |                 | 0.97      | 0.89 1.05 |                 | 0.86      | 0.78 0.93 |
| Social support                                           |                 | 0.86      | 0.81 0.90 |                 | 0.81      | 0.76 0.86 |
| Discrimination                                           |                 | 1.44      | 1.34 1.53 |                 | 1.35      | 1.24 1.48 |
| Year of birth                                            |                 | 1.02      | 1.01 1.02 |                 | 1.02      | 1.01 1.02 |
| Personal Income (\$10,000-\$19,999)                      |                 | 0.98      | 0.82 1.17 |                 | 1.03      | 0.84 1.26 |
| Personal Income (\$20,000-\$29,999)                      |                 | 0.74      | 0.61 0.90 |                 | 0.89      | 0.72 1.10 |
| Personal Income (\$30,000-\$39,999)                      |                 | 0.78      | 0.63 0.95 |                 | 0.85      | 0.68 1.05 |
| Personal Income (\$40,000-\$49,999)                      |                 | 0.76      | 0.61 0.95 |                 | 0.64      | 0.50 0.80 |
| Personal Income (\$50,000-\$59,999)                      |                 | 0.81      | 0.65 1.01 |                 | 0.51      | 0.38 0.68 |
| Personal Income (\$60,000-\$69,999)                      |                 | 0.71      | 0.56 0.91 |                 | 0.55      | 0.41 0.74 |
| Personal Income (\$70,000-\$79,999)                      |                 | 0.69      | 0.49 0.96 |                 | 0.55      | 0.40 0.76 |
| Personal Income (\$80,000-\$89,999)                      |                 | 0.77      | 0.53 1.10 |                 | 0.77      | 0.47 1.26 |
| Personal Income (\$90,000-\$99,999)                      |                 | 0.97      | 0.65 1.45 |                 | 0.63      | 0.39 1.01 |
| Personal Income (\$100,000-\$149,999)                    |                 | 0.59      | 0.42 0.82 |                 | 0.63      | 0.44 0.89 |
| Personal Income (More than \$150,000)                    |                 | 0.93      | 0.62 1.38 |                 | 0.44      | 0.25 0.75 |
| Educational Level (High school graduate)                 |                 | 1.07      | 0.72 1.58 |                 | 1.50      | 0.87 2.61 |
| Educational Level (Some college credit, no degree)       |                 | 1.05      | 0.72 1.54 |                 | 1.67      | 0.98 2.85 |
| Educational Level (Trade/Technical/Vocational education) |                 | 1.16      | 0.73 1.82 |                 | 1.90      | 1.03 3.51 |
| Educational Level (Associate degree)                     |                 | 1.02      | 0.67 1.54 |                 | 1.61      | 0.93 2.76 |
| Educational Level (Bachelor's degree)                    |                 | 0.89      | 0.61 1.29 |                 | 1.53      | 0.90 2.59 |
| Educational Level (Master's degree)                      |                 | 1.08      | 0.72 1.61 |                 | 1.61      | 0.92 2.80 |
| Educational Level (professional degree)                  |                 | 0.73      | 0.37 1.44 |                 | 1.83      | 0.90 3.74 |
| Educational Level (Doctorate degree)                     |                 | 0.93      | 0.58 1.49 |                 | 1.73      | 0.86 3.47 |
| Ethnicity (White)                                        |                 | 1.59      | 1.29 1.96 |                 | 1.32      | 1.01 1.73 |
| Ethnicity (Hispanic, Latinx, Spanish)                    |                 | 1.07      | 0.86 1.33 |                 | 1.11      | 0.83 1.47 |
| Ethnicity (Black, African American)                      |                 | 1.31      | 1.03 1.67 |                 | 0.94      | 0.72 1.24 |
| Ethnicity (Asian)                                        |                 | 1.16      | 0.91 1.48 |                 | 1.09      | 0.76 1.56 |
| Ethnicity (Native)                                       |                 | 1.06      | 0.80 1.41 |                 | 1.89      | 1.27 2.80 |
| Sex (male=0, female=1)                                   |                 | 0.94      | 0.83 1.06 |                 | 1.21      | 1.05 1.40 |
| <b>Goodness of Fit</b>                                   |                 |           |           |                 |           |           |
| Deviance/df                                              |                 | 1.172     |           |                 | 1.131     |           |
| Pearson Chi-Square/df                                    |                 | 1.019     |           |                 | 1.104     |           |
| Loglikelihood                                            |                 | -5645.574 |           |                 | -5566.070 |           |
| AIC                                                      |                 | 11361.148 |           |                 | 11202.139 |           |
| <b>Omnibus tests</b>                                     |                 |           |           |                 |           |           |
| Chi-square                                               |                 | 284.801   |           |                 | 315.270   |           |
| df                                                       |                 | 33        |           |                 | 33        |           |
| N                                                        |                 | 1896      |           |                 | 2004      |           |

Note: Participants reporting Native Hawaiian/Pacific Islander, Middle east/North Africa or Other as ethnicity are the reference group for the ethnicity variables. Personal Income < \$10,000 is the reference group for the "Personal Income" variables. Educational level < high school diploma is the reference group for the "Educational Level" variables. The models are computed with robust covariance matrix estimation.

**Table S31.** Negative binomial regression predicting number of days where poor mental or physical health prevented the respondent from doing usual activities (during past 30 days) (with sex as covariate).

|                                                          | <i>SAMPLE 1</i> |           |        | <i>SAMPLE 2</i> |           |        |
|----------------------------------------------------------|-----------------|-----------|--------|-----------------|-----------|--------|
|                                                          | Incidence ratio | rate      | 95% CI | Incidence ratio | rate      | 95% CI |
| Caregiver strain                                         | 1.13            | 1.04      | 1.21   | 1.11            | 1.03      | 1.19   |
| Work strain                                              | 0.88            | 0.80      | 0.96   | 0.99            | 0.90      | 1.08   |
| Independence                                             | 1.02            | 0.94      | 1.12   | 0.87            | 0.77      | 1.00   |
| Risk-taking                                              | 0.93            | 0.85      | 1.01   | 1.02            | 0.94      | 1.12   |
| Emotional intelligence                                   | 0.98            | 0.88      | 1.10   | 0.92            | 0.84      | 1.02   |
| Social support                                           | 0.92            | 0.86      | 0.99   | 0.87            | 0.81      | 0.94   |
| Discrimination                                           | 1.76            | 1.61      | 1.93   | 1.56            | 1.40      | 1.73   |
| Year of birth                                            | 1.01            | 1.00      | 1.01   | 1.00            | 1.00      | 1.01   |
| Personal Income (\$10,000-\$19,999)                      | 1.01            | 0.80      | 1.27   | 0.91            | 0.70      | 1.17   |
| Personal Income (\$20,000-\$29,999)                      | 0.89            | 0.70      | 1.14   | 0.93            | 0.73      | 1.18   |
| Personal Income (\$30,000-\$39,999)                      | 0.75            | 0.56      | 1.01   | 0.78            | 0.59      | 1.02   |
| Personal Income (\$40,000-\$49,999)                      | 0.91            | 0.68      | 1.22   | 0.65            | 0.48      | 0.87   |
| Personal Income (\$50,000-\$59,999)                      | 0.76            | 0.56      | 1.03   | 0.52            | 0.37      | 0.73   |
| Personal Income (\$60,000-\$69,999)                      | 0.63            | 0.44      | 0.89   | 0.67            | 0.47      | 0.97   |
| Personal Income (\$70,000-\$79,999)                      | 0.66            | 0.42      | 1.04   | 0.62            | 0.43      | 0.89   |
| Personal Income (\$80,000-\$89,999)                      | 1.01            | 0.59      | 1.74   | 0.65            | 0.40      | 1.04   |
| Personal Income (\$90,000-\$99,999)                      | 0.99            | 0.51      | 1.93   | 0.62            | 0.40      | 0.95   |
| Personal Income (\$100,000-\$149,999)                    | 0.90            | 0.57      | 1.41   | 0.70            | 0.46      | 1.06   |
| Personal Income (More than \$150,000)                    | 1.48            | 0.88      | 2.50   | 0.75            | 0.38      | 1.47   |
| Educational Level (High school graduate)                 | 1.08            | 0.65      | 1.79   | 1.00            | 0.52      | 1.93   |
| Educational Level (Some college credit, no degree)       | 0.86            | 0.53      | 1.41   | 1.13            | 0.61      | 2.10   |
| Educational Level (Trade/Technical/Vocational education) | 1.33            | 0.75      | 2.39   | 0.82            | 0.40      | 1.66   |
| Educational Level (Associate degree)                     | 0.84            | 0.49      | 1.42   | 0.96            | 0.51      | 1.82   |
| Educational Level (Bachelor's degree)                    | 0.88            | 0.54      | 1.43   | 0.78            | 0.42      | 1.44   |
| Educational Level (Master's degree)                      | 0.74            | 0.44      | 1.25   | 0.71            | 0.37      | 1.34   |
| Educational Level (professional degree)                  | 0.25            | 0.11      | 0.58   | 0.53            | 0.23      | 1.25   |
| Educational Level (Doctorate degree)                     | 0.67            | 0.37      | 1.20   | 0.61            | 0.28      | 1.33   |
| Ethnicity (White)                                        | 1.15            | 0.87      | 1.53   | 0.90            | 0.65      | 1.23   |
| Ethnicity (Hispanic, Latinx, Spanish)                    | 0.90            | 0.67      | 1.20   | 1.01            | 0.71      | 1.43   |
| Ethnicity (Black, African American)                      | 1.03            | 0.74      | 1.43   | 0.77            | 0.55      | 1.08   |
| Ethnicity (Asian)                                        | 0.78            | 0.57      | 1.06   | 0.88            | 0.57      | 1.34   |
| Ethnicity (Native)                                       | 0.93            | 0.62      | 1.40   | 2.04            | 1.26      | 3.30   |
| Sex (male=0, female=1)                                   | 0.88            | 0.74      | 1.04   | 1.11            | 0.94      | 1.31   |
| <b>Goodness of Fit</b>                                   |                 |           |        |                 |           |        |
| Deviance/df                                              |                 | 1.081     |        |                 | 1.057     |        |
| Pearson Chi-Square/df                                    |                 | 1.170     |        |                 | 1.143     |        |
| Loglikelihood                                            |                 | -4564.397 |        |                 | -4630.156 |        |
| AIC                                                      |                 | 9198.795  |        |                 | 9330.312  |        |
| <b>Omnibus tests</b>                                     |                 |           |        |                 |           |        |
| Chi-square                                               |                 | 246.377   |        |                 | 223.091   |        |
| df                                                       |                 | 33        |        |                 | 33        |        |
| N                                                        |                 | 1872      |        |                 | 2004      |        |

Note: Participants reporting Native Hawaiian/Pacific Islander, Middle east/North Africa or Other as ethnicity are the reference group for the ethnicity variables. Personal Income < \$10,000 is the reference group for the "Personal Income" variables. Educational level < high school diploma is the reference group for the "Educational Level" variables. The models are computed with robust covariance matrix estimation.



**Table S32.** Logistic regression predicting general health status (excellent, very good, good= 0, fair, poor= 1) (with sex as covariate).

|                                                          | <i>SAMPLE 1</i> |          |           | <i>SAMPLE 2</i> |          |           |
|----------------------------------------------------------|-----------------|----------|-----------|-----------------|----------|-----------|
|                                                          | Incidence ratio | rate     | 95% CI    | Incidence ratio | rate     | 95% CI    |
| Caregiver strain                                         |                 | 1.28     | 1.11 1.47 |                 | 1.18     | 1.03 1.34 |
| Work strain                                              |                 | 0.88     | 0.74 1.06 |                 | 0.98     | 0.83 1.17 |
| Independence                                             |                 | 0.91     | 0.77 1.07 |                 | 0.71     | 0.56 0.89 |
| Risk-taking                                              |                 | 0.57     | 0.48 0.68 |                 | 0.69     | 0.58 0.81 |
| Emotional intelligence                                   |                 | 0.91     | 0.76 1.10 |                 | 0.90     | 0.75 1.07 |
| Social support                                           |                 | 0.83     | 0.73 0.95 |                 | 0.78     | 0.69 0.88 |
| Discrimination                                           |                 | 1.43     | 1.18 1.73 |                 | 1.55     | 1.29 1.87 |
| Year of birth                                            |                 | 0.98     | 0.97 0.99 |                 | 0.98     | 0.97 0.99 |
| Personal Income (\$10,000-\$19,999)                      |                 | 0.78     | 0.52 1.19 |                 | 1.19     | 0.78 1.79 |
| Personal Income (\$20,000-\$29,999)                      |                 | 0.87     | 0.56 1.34 |                 | 0.83     | 0.54 1.29 |
| Personal Income (\$30,000-\$39,999)                      |                 | 0.60     | 0.36 1.00 |                 | 0.83     | 0.52 1.33 |
| Personal Income (\$40,000-\$49,999)                      |                 | 0.75     | 0.45 1.26 |                 | 0.62     | 0.37 1.04 |
| Personal Income (\$50,000-\$59,999)                      |                 | 0.62     | 0.37 1.05 |                 | 0.52     | 0.29 0.93 |
| Personal Income (\$60,000-\$69,999)                      |                 | 0.85     | 0.47 1.52 |                 | 0.78     | 0.41 1.48 |
| Personal Income (\$70,000-\$79,999)                      |                 | 0.60     | 0.28 1.30 |                 | 0.63     | 0.33 1.22 |
| Personal Income (\$80,000-\$89,999)                      |                 | 0.19     | 0.04 0.81 |                 | 0.52     | 0.20 1.34 |
| Personal Income (\$90,000-\$99,999)                      |                 | 0.30     | 0.06 1.47 |                 | 0.96     | 0.42 2.20 |
| Personal Income (\$100,000-\$149,999)                    |                 | 0.11     | 0.02 0.47 |                 | 0.60     | 0.30 1.21 |
| Personal Income (More than \$150,000)                    |                 | 0.09     | 0.01 0.74 |                 | 0.73     | 0.23 2.33 |
| Educational Level (High school graduate)                 |                 | 0.45     | 0.19 1.08 |                 | 0.85     | 0.28 2.54 |
| Educational Level (Some college credit, no degree)       |                 | 0.58     | 0.26 1.33 |                 | 0.92     | 0.32 2.65 |
| Educational Level (Trade/Technical/Vocational education) |                 | 0.56     | 0.20 1.60 |                 | 0.79     | 0.25 2.52 |
| Educational Level (Associate degree)                     |                 | 0.43     | 0.17 1.06 |                 | 1.01     | 0.34 2.96 |
| Educational Level (Bachelor's degree)                    |                 | 0.41     | 0.18 0.94 |                 | 0.50     | 0.17 1.44 |
| Educational Level (Master's degree)                      |                 | 0.47     | 0.19 1.15 |                 | 0.39     | 0.13 1.19 |
| Educational Level (professional degree)                  |                 | 0.35     | 0.06 2.02 |                 | 0.25     | 0.05 1.25 |
| Educational Level (Doctorate degree)                     |                 | 0.18     | 0.04 0.75 |                 | 0.63     | 0.17 2.35 |
| Ethnicity (White)                                        |                 | 1.96     | 1.09 3.52 |                 | 1.00     | 0.53 1.88 |
| Ethnicity (Hispanic, Latinx, Spanish)                    |                 | 0.83     | 0.43 1.63 |                 | 1.07     | 0.56 2.05 |
| Ethnicity (Black, African American)                      |                 | 2.22     | 1.16 4.25 |                 | 0.91     | 0.47 1.78 |
| Ethnicity (Asian)                                        |                 | 1.68     | 0.88 3.23 |                 | 0.79     | 0.33 1.86 |
| Ethnicity (Native)                                       |                 | 0.48     | 0.19 1.18 |                 | 0.85     | 0.37 1.96 |
| Sex (male=0, female=1)                                   |                 | 0.60     | 0.44 0.82 |                 | 0.65     | 0.48 0.87 |
| <b>Goodness of Fit</b>                                   |                 |          |           |                 |          |           |
| Deviance/df                                              |                 | 0.828    |           |                 | 0.877    |           |
| Pearson Chi-Square/df                                    |                 | 1.037    |           |                 | 1.013    |           |
| Loglikelihood                                            |                 | 1600.261 |           |                 | 1801.791 |           |
| AIC                                                      |                 | 1601.549 |           |                 | 1802.996 |           |
| <b>Omnibus tests</b>                                     |                 |          |           |                 |          |           |
| Chi-square                                               |                 | 203.535  |           |                 | 188.828  |           |
| df                                                       |                 | 33       |           |                 | 33       |           |
| N                                                        |                 | 1884     |           |                 | 2010     |           |

Note: Participants reporting Native Hawaiian/Pacific Islander, Middle east/North Africa or Other as ethnicity are the reference group for the ethnicity variables. Personal Income < \$10,000 is the reference group for the "Personal Income" variables. Educational level < high school diploma is the reference group for the "Educational Level" variables. The models are computed with robust covariance matrix estimation.

**Table S33.** Logistic regression predicting smoking (not smoking=0, smoking=1) (with sex as covariate).

|                                                          | <i>SAMPLE 1</i> |          |        | <i>SAMPLE 2</i> |          |        |
|----------------------------------------------------------|-----------------|----------|--------|-----------------|----------|--------|
|                                                          | Incidence ratio | rate     | 95% CI | Incidence ratio | rate     | 95% CI |
| Caregiver strain                                         | 1.42            | 1.24     | 1.62   | 1.18            | 1.05     | 1.33   |
| Work strain                                              | 1.37            | 1.15     | 1.64   | 1.26            | 1.08     | 1.46   |
| Independence                                             | 1.22            | 1.03     | 1.46   | 1.07            | 0.85     | 1.35   |
| Risk-taking                                              | 1.45            | 1.21     | 1.72   | 1.05            | 0.91     | 1.21   |
| Emotional intelligence                                   | 1.46            | 1.22     | 1.75   | 1.12            | 0.96     | 1.30   |
| Social support                                           | 0.98            | 0.86     | 1.12   | 0.97            | 0.87     | 1.09   |
| Discrimination                                           | 1.09            | 0.90     | 1.31   | 1.16            | 0.97     | 1.38   |
| Year of birth                                            | 0.97            | 0.96     | 0.98   | 1.00            | 0.99     | 1.01   |
| Personal Income (\$10,000-\$19,999)                      | 1.04            | 0.63     | 1.71   | 1.22            | 0.80     | 1.86   |
| Personal Income (\$20,000-\$29,999)                      | 1.41            | 0.87     | 2.28   | 0.89            | 0.58     | 1.37   |
| Personal Income (\$30,000-\$39,999)                      | 0.82            | 0.47     | 1.43   | 1.16            | 0.74     | 1.82   |
| Personal Income (\$40,000-\$49,999)                      | 1.20            | 0.69     | 2.07   | 0.94            | 0.59     | 1.51   |
| Personal Income (\$50,000-\$59,999)                      | 1.10            | 0.62     | 1.94   | 0.88            | 0.54     | 1.46   |
| Personal Income (\$60,000-\$69,999)                      | 1.31            | 0.72     | 2.37   | 0.86            | 0.47     | 1.57   |
| Personal Income (\$70,000-\$79,999)                      | 1.17            | 0.59     | 2.31   | 1.04            | 0.58     | 1.85   |
| Personal Income (\$80,000-\$89,999)                      | 0.50            | 0.16     | 1.59   | 1.47            | 0.73     | 2.95   |
| Personal Income (\$90,000-\$99,999)                      | 1.94            | 0.84     | 4.48   | 0.64            | 0.29     | 1.43   |
| Personal Income (\$100,000-\$149,999)                    | 0.90            | 0.47     | 1.73   | 0.95            | 0.52     | 1.75   |
| Personal Income (More than \$150,000)                    | 4.84            | 2.36     | 9.94   | 0.38            | 0.12     | 1.21   |
| Educational Level (High school graduate)                 | 1.34            | 0.43     | 4.12   | 0.69            | 0.25     | 1.90   |
| Educational Level (Some college credit, no degree)       | 1.02            | 0.34     | 3.08   | 0.65            | 0.24     | 1.75   |
| Educational Level (Trade/Technical/Vocational education) | 1.74            | 0.50     | 6.06   | 1.00            | 0.35     | 2.89   |
| Educational Level (Associate degree)                     | 0.72            | 0.23     | 2.28   | 0.70            | 0.26     | 1.91   |
| Educational Level (Bachelor's degree)                    | 0.49            | 0.16     | 1.47   | 0.30            | 0.11     | 0.79   |
| Educational Level (Master's degree)                      | 0.45            | 0.14     | 1.40   | 0.23            | 0.08     | 0.66   |
| Educational Level (professional degree)                  | 0.42            | 0.08     | 2.25   | 0.32            | 0.08     | 1.26   |
| Educational Level (Doctorate degree)                     | 0.75            | 0.22     | 2.60   | 0.18            | 0.04     | 0.78   |
| Ethnicity (White)                                        | 1.31            | 0.65     | 2.63   | 0.71            | 0.40     | 1.25   |
| Ethnicity (Hispanic, Latinx, Spanish)                    | 0.90            | 0.48     | 1.68   | 0.46            | 0.24     | 0.87   |
| Ethnicity (Black, African American)                      | 0.78            | 0.34     | 1.79   | 0.43            | 0.23     | 0.81   |
| Ethnicity (Asian)                                        | 0.42            | 0.17     | 1.04   | 0.30            | 0.13     | 0.70   |
| Ethnicity (Native)                                       | 0.74            | 0.29     | 1.91   | 1.65            | 0.85     | 3.20   |
| Sex (male=0, female=1)                                   | 0.66            | 0.48     | 0.89   | 0.89            | 0.69     | 1.16   |
| <b>Goodness of Fit</b>                                   |                 |          |        |                 |          |        |
| Deviance/df                                              |                 | 0.824    |        |                 | 1.007    |        |
| Pearson Chi-Square/df                                    |                 | 1.042    |        |                 | 1.008    |        |
| Loglikelihood                                            |                 | -761.542 |        |                 | -994.497 |        |
| AIC                                                      |                 | 1591.084 |        |                 | 2056.993 |        |
| <b>Omnibus tests</b>                                     |                 |          |        |                 |          |        |
| Chi-square                                               |                 | 267.437  |        |                 | 143.257  |        |
| df                                                       |                 | 33       |        |                 | 33       |        |
| N                                                        |                 | 1883     |        |                 | 2009     |        |

Note: Participants reporting Native Hawaiian/Pacific Islander, Middle east/North Africa or Other as ethnicity are the reference group for the ethnicity variables. Personal Income < \$10,000 is the reference group for the "Personal Income" variables. Educational level < high school diploma is the reference group for the "Educational Level" variables. The models are computed with robust covariance matrix estimation.

**Table S34.** Logistic regression predicting vaping (not vaping=0, vaping=1) (with sex as covariate).

|                                                          | SAMPLE 1        |          |            | SAMPLE 2        |          |           |
|----------------------------------------------------------|-----------------|----------|------------|-----------------|----------|-----------|
|                                                          | Incidence ratio | rate     | 95% CI     | Incidence ratio | rate     | 95% CI    |
| Caregiver strain                                         |                 | 1.06     | 0.90 1.26  |                 | 1.10     | 0.93 1.29 |
| Work strain                                              |                 | 1.23     | 0.97 1.55  |                 | 1.29     | 1.05 1.59 |
| Independence                                             |                 | 1.17     | 0.95 1.45  |                 | 1.05     | 0.76 1.44 |
| Risk-taking                                              |                 | 1.20     | 0.98 1.48  |                 | 1.00     | 0.80 1.25 |
| Emotional intelligence                                   |                 | 1.39     | 1.12 1.71  |                 | 1.05     | 0.84 1.31 |
| Social support                                           |                 | 0.98     | 0.84 1.14  |                 | 0.88     | 0.76 1.04 |
| Discrimination                                           |                 | 1.40     | 1.15 1.70  |                 | 1.46     | 1.17 1.81 |
| Year of birth                                            |                 | 0.98     | 0.97 1.00  |                 | 1.01     | 1.00 1.03 |
| Personal Income (\$10,000-\$19,999)                      |                 | 1.97     | 0.98 3.95  |                 | 1.20     | 0.60 2.38 |
| Personal Income (\$20,000-\$29,999)                      |                 | 1.70     | 0.85 3.40  |                 | 1.65     | 0.88 3.12 |
| Personal Income (\$30,000-\$39,999)                      |                 | 2.65     | 1.36 5.14  |                 | 1.04     | 0.52 2.09 |
| Personal Income (\$40,000-\$49,999)                      |                 | 2.11     | 1.01 4.39  |                 | 1.09     | 0.53 2.23 |
| Personal Income (\$50,000-\$59,999)                      |                 | 2.49     | 1.23 5.04  |                 | 1.48     | 0.72 3.05 |
| Personal Income (\$60,000-\$69,999)                      |                 | 2.99     | 1.42 6.29  |                 | 1.32     | 0.58 3.01 |
| Personal Income (\$70,000-\$79,999)                      |                 | 1.72     | 0.74 3.98  |                 | 0.90     | 0.35 2.33 |
| Personal Income (\$80,000-\$89,999)                      |                 | 0.72     | 0.16 3.22  |                 | 1.03     | 0.32 3.33 |
| Personal Income (\$90,000-\$99,999)                      |                 | 4.89     | 1.91 12.55 |                 | 1.02     | 0.33 3.14 |
| Personal Income (\$100,000-\$149,999)                    |                 | 2.26     | 0.98 5.21  |                 | 0.91     | 0.35 2.32 |
| Personal Income (More than \$150,000)                    |                 | 7.17     | 3.21 16.00 |                 | 0.46     | 0.06 3.77 |
| Educational Level (High school graduate)                 |                 | 0.35     | 0.13 0.93  |                 | 0.85     | 0.16 4.59 |
| Educational Level (Some college credit, no degree)       |                 | 0.29     | 0.11 0.76  |                 | 0.81     | 0.16 4.16 |
| Educational Level (Trade/Technical/Vocational education) |                 | 0.37     | 0.10 1.32  |                 | 0.45     | 0.07 2.88 |
| Educational Level (Associate degree)                     |                 | 0.28     | 0.10 0.78  |                 | 1.17     | 0.23 6.04 |
| Educational Level (Bachelor's degree)                    |                 | 0.17     | 0.07 0.44  |                 | 0.66     | 0.13 3.35 |
| Educational Level (Master's degree)                      |                 | 0.25     | 0.09 0.67  |                 | 0.45     | 0.08 2.44 |
| Educational Level (professional degree)                  |                 | 0.29     | 0.06 1.39  |                 | 0.50     | 0.06 4.46 |
| Educational Level (Doctorate degree)                     |                 | 0.21     | 0.06 0.68  |                 | 0.49     | 0.06 4.39 |
| Ethnicity (White)                                        |                 | 1.85     | 1.02 3.36  |                 | 1.05     | 0.53 2.05 |
| Ethnicity (Hispanic, Latinx, Spanish)                    |                 | 1.23     | 0.64 2.37  |                 | 1.36     | 0.63 2.92 |
| Ethnicity (Black, African American)                      |                 | 1.44     | 0.67 3.08  |                 | 0.73     | 0.35 1.53 |
| Ethnicity (Asian)                                        |                 | 1.18     | 0.58 2.39  |                 | 0.73     | 0.29 1.87 |
| Ethnicity (Native)                                       |                 | 1.48     | 0.60 3.61  |                 | 1.63     | 0.67 3.95 |
| Sex (male=0, female=1)                                   |                 | 0.45     | 0.31 0.64  |                 | 0.76     | 0.52 1.11 |
| <b>Goodness of Fit</b>                                   |                 |          |            |                 |          |           |
| Deviance/df                                              |                 | 0.643    |            |                 | 0.572    |           |
| Pearson Chi-Square/df                                    |                 | 1.040    |            |                 | 1.013    |           |
| Loglikelihood                                            |                 | -594.193 |            |                 | -564.518 |           |
| AIC                                                      |                 | 1256.386 |            |                 | 1197.036 |           |
| <b>Omnibus tests</b>                                     |                 |          |            |                 |          |           |
| Chi-square                                               |                 | 169.275  |            |                 | 59.470   |           |
| df                                                       |                 | 33       |            |                 | 33       |           |
| N                                                        |                 | 1882     |            |                 | 2009     |           |

Note: Participants reporting Native Hawaiian/Pacific Islander, Middle east/North Africa or Other as ethnicity are the reference group for the ethnicity variables. Personal Income < \$10,000 is the reference group for the "Personal Income" variables. Educational level < high school diploma is the reference group for the "Educational Level" variables. The models are computed with robust covariance matrix estimation.

**Table S35.** Logistic regression predicting binge drinking (less than monthly=0, monthly, weekly, and daily=1) (with sex as covariate).

|                                                          | <i>SAMPLE 1</i> |          |            | <i>SAMPLE 2</i> |          |           |
|----------------------------------------------------------|-----------------|----------|------------|-----------------|----------|-----------|
|                                                          | Incidence ratio | rate     | 95% CI     | Incidence ratio | rate     | 95% CI    |
| Caregiver strain                                         |                 | 0.92     | 0.81 1.06  |                 | 0.91     | 0.80 1.04 |
| Work strain                                              |                 | 1.28     | 1.08 1.51  |                 | 1.03     | 0.88 1.21 |
| Independence                                             |                 | 1.08     | 0.93 1.25  |                 | 1.19     | 0.94 1.49 |
| Risk-taking                                              |                 | 1.53     | 1.31 1.78  |                 | 1.25     | 1.07 1.45 |
| Emotional intelligence                                   |                 | 1.18     | 1.00 1.40  |                 | 1.04     | 0.88 1.21 |
| Social support                                           |                 | 1.01     | 0.90 1.13  |                 | 0.87     | 0.78 0.97 |
| Discrimination                                           |                 | 1.18     | 1.00 1.39  |                 | 1.11     | 0.92 1.32 |
| Year of birth                                            |                 | 1.02     | 1.01 1.03  |                 | 1.03     | 1.02 1.04 |
| Personal Income (\$10,000-\$19,999)                      |                 | 1.02     | 0.64 1.60  |                 | 1.26     | 0.78 2.03 |
| Personal Income (\$20,000-\$29,999)                      |                 | 1.14     | 0.73 1.81  |                 | 1.99     | 1.26 3.13 |
| Personal Income (\$30,000-\$39,999)                      |                 | 1.18     | 0.75 1.87  |                 | 1.34     | 0.82 2.20 |
| Personal Income (\$40,000-\$49,999)                      |                 | 1.29     | 0.79 2.09  |                 | 1.81     | 1.09 2.99 |
| Personal Income (\$50,000-\$59,999)                      |                 | 0.91     | 0.55 1.50  |                 | 1.39     | 0.81 2.38 |
| Personal Income (\$60,000-\$69,999)                      |                 | 1.19     | 0.70 2.03  |                 | 1.98     | 1.11 3.55 |
| Personal Income (\$70,000-\$79,999)                      |                 | 0.81     | 0.44 1.51  |                 | 1.44     | 0.78 2.65 |
| Personal Income (\$80,000-\$89,999)                      |                 | 1.15     | 0.52 2.55  |                 | 1.16     | 0.52 2.59 |
| Personal Income (\$90,000-\$99,999)                      |                 | 1.66     | 0.72 3.81  |                 | 2.31     | 1.14 4.67 |
| Personal Income (\$100,000-\$149,999)                    |                 | 1.13     | 0.62 2.08  |                 | 1.95     | 1.05 3.59 |
| Personal Income (More than \$150,000)                    |                 | 2.01     | 1.01 4.03  |                 | 2.44     | 1.01 5.92 |
| Educational Level (High school graduate)                 |                 | 1.22     | 0.41 3.65  |                 | 0.50     | 0.15 1.66 |
| Educational Level (Some college credit, no degree)       |                 | 1.68     | 0.58 4.82  |                 | 0.90     | 0.29 2.81 |
| Educational Level (Trade/Technical/Vocational education) |                 | 2.44     | 0.73 8.16  |                 | 0.85     | 0.25 2.93 |
| Educational Level (Associate degree)                     |                 | 1.37     | 0.45 4.18  |                 | 0.65     | 0.20 2.11 |
| Educational Level (Bachelor's degree)                    |                 | 1.54     | 0.54 4.41  |                 | 0.63     | 0.20 1.96 |
| Educational Level (Master's degree)                      |                 | 1.82     | 0.62 5.34  |                 | 0.58     | 0.18 1.89 |
| Educational Level (professional degree)                  |                 | 3.28     | 0.78 13.78 |                 | 0.58     | 0.13 2.50 |
| Educational Level (Doctorate degree)                     |                 | 1.77     | 0.52 5.95  |                 | 0.65     | 0.15 2.74 |
| Ethnicity (White)                                        |                 | 1.89     | 1.08 3.31  |                 | 0.93     | 0.54 1.60 |
| Ethnicity (Hispanic, Latinx, Spanish)                    |                 | 1.63     | 0.96 2.77  |                 | 0.86     | 0.50 1.51 |
| Ethnicity (Black, African American)                      |                 | 0.74     | 0.36 1.53  |                 | 1.05     | 0.57 1.93 |
| Ethnicity (Asian)                                        |                 | 0.59     | 0.30 1.13  |                 | 0.54     | 0.27 1.09 |
| Ethnicity (Native)                                       |                 | 0.45     | 0.19 1.06  |                 | 0.79     | 0.38 1.65 |
| Sex (male=0, female=1)                                   |                 | 0.55     | 0.42 0.71  |                 | 0.77     | 0.59 1.01 |
| <b>Goodness of Fit</b>                                   |                 |          |            |                 |          |           |
| Deviance/df                                              |                 | 1.000    |            |                 | 1.002    |           |
| Pearson Chi-Square/df                                    |                 | 1.017    |            |                 | 1.011    |           |
| Loglikelihood                                            |                 | -922.640 |            |                 | -988.206 |           |
| AIC                                                      |                 | 1913.280 |            |                 | 2044.412 |           |
| <b>Omnibus tests</b>                                     |                 |          |            |                 |          |           |
| Chi-square                                               |                 | 214.714  |            |                 | 116.766  |           |
| df                                                       |                 | 33       |            |                 | 33       |           |
| N                                                        |                 | 1880     |            |                 | 2009     |           |

Note: Participants reporting Native Hawaiian/Pacific Islander, Middle east/North Africa or Other as ethnicity are the reference group for the ethnicity variables. Personal Income < \$10,000 is the reference group for the "Personal Income" variables. Educational level < high school diploma is the reference group for the "Educational Level" variables. The models are computed with robust covariance matrix estimation.

**Table S36.** Logistic regression predicting Overweight (BMI<25=0, BMI≥25 =1) (with sex as covariate).

|                                                          | <i>SAMPLE 1</i> |           |           | <i>SAMPLE 2</i> |           |           |
|----------------------------------------------------------|-----------------|-----------|-----------|-----------------|-----------|-----------|
|                                                          | Incidence ratio | rate      | 95% CI    | Incidence ratio | rate      | 95% CI    |
| Caregiver strain                                         |                 | 1.18      | 1.05 1.32 |                 | 1.27      | 1.13 1.41 |
| Work strain                                              |                 | 1.04      | 0.91 1.19 |                 | 1.17      | 1.02 1.33 |
| Independence                                             |                 | 0.99      | 0.88 1.12 |                 | 1.05      | 0.87 1.26 |
| Risk-taking                                              |                 | 0.82      | 0.72 0.93 |                 | 0.85      | 0.75 0.97 |
| Emotional intelligence                                   |                 | 0.99      | 0.86 1.14 |                 | 1.03      | 0.90 1.18 |
| Social support                                           |                 | 1.00      | 0.91 1.10 |                 | 1.07      | 0.97 1.18 |
| Discrimination                                           |                 | 1.23      | 1.06 1.42 |                 | 1.26      | 1.08 1.48 |
| Year of birth                                            |                 | 0.98      | 0.97 0.99 |                 | 0.97      | 0.96 0.98 |
| Personal Income (\$10,000-\$19,999)                      |                 | 1.12      | 0.79 1.58 |                 | 0.83      | 0.57 1.19 |
| Personal Income (\$20,000-\$29,999)                      |                 | 1.20      | 0.84 1.72 |                 | 0.84      | 0.58 1.21 |
| Personal Income (\$30,000-\$39,999)                      |                 | 1.13      | 0.78 1.63 |                 | 0.77      | 0.52 1.13 |
| Personal Income (\$40,000-\$49,999)                      |                 | 1.15      | 0.78 1.69 |                 | 0.77      | 0.52 1.15 |
| Personal Income (\$50,000-\$59,999)                      |                 | 1.46      | 0.97 2.19 |                 | 1.16      | 0.75 1.79 |
| Personal Income (\$60,000-\$69,999)                      |                 | 1.29      | 0.82 2.02 |                 | 1.28      | 0.76 2.16 |
| Personal Income (\$70,000-\$79,999)                      |                 | 1.27      | 0.75 2.14 |                 | 2.21      | 1.31 3.74 |
| Personal Income (\$80,000-\$89,999)                      |                 | 1.16      | 0.59 2.31 |                 | 0.99      | 0.54 1.79 |
| Personal Income (\$90,000-\$99,999)                      |                 | 1.91      | 0.84 4.32 |                 | 1.07      | 0.58 1.97 |
| Personal Income (\$100,000-\$149,999)                    |                 | 1.02      | 0.60 1.74 |                 | 1.01      | 0.60 1.70 |
| Personal Income (More than \$150,000)                    |                 | 1.27      | 0.65 2.48 |                 | 0.97      | 0.44 2.17 |
| Educational Level (High school graduate)                 |                 | 0.86      | 0.39 1.90 |                 | 0.24      | 0.07 0.84 |
| Educational Level (Some college credit, no degree)       |                 | 0.90      | 0.42 1.92 |                 | 0.32      | 0.09 1.09 |
| Educational Level (Trade/Technical/Vocational education) |                 | 0.88      | 0.34 2.28 |                 | 0.21      | 0.06 0.76 |
| Educational Level (Associate degree)                     |                 | 1.06      | 0.47 2.40 |                 | 0.23      | 0.07 0.80 |
| Educational Level (Bachelor's degree)                    |                 | 0.59      | 0.28 1.26 |                 | 0.21      | 0.06 0.72 |
| Educational Level (Master's degree)                      |                 | 0.78      | 0.35 1.73 |                 | 0.21      | 0.06 0.74 |
| Educational Level (professional degree)                  |                 | 0.58      | 0.18 1.82 |                 | 0.13      | 0.03 0.52 |
| Educational Level (Doctorate degree)                     |                 | 0.69      | 0.27 1.79 |                 | 0.13      | 0.03 0.51 |
| Ethnicity (White)                                        |                 | 1.08      | 0.70 1.66 |                 | 1.03      | 0.64 1.67 |
| Ethnicity (Hispanic, Latinx, Spanish)                    |                 | 1.28      | 0.81 2.03 |                 | 1.60      | 0.97 2.63 |
| Ethnicity (Black, African American)                      |                 | 1.66      | 0.99 2.76 |                 | 1.16      | 0.67 1.99 |
| Ethnicity (Asian)                                        |                 | 0.49      | 0.30 0.80 |                 | 0.54      | 0.30 0.95 |
| Ethnicity (Native)                                       |                 | 2.10      | 1.02 4.34 |                 | 1.17      | 0.61 2.23 |
| Sex (male=0, female=1)                                   |                 | 0.76      | 0.60 0.95 |                 | 0.58      | 0.46 0.73 |
| <b>Goodness of Fit</b>                                   |                 |           |           |                 |           |           |
| Deviance/df                                              |                 | 1.313     |           |                 | 1.283     |           |
| Pearson Chi-Square/df                                    |                 | 1.020     |           |                 | 1.020     |           |
| Loglikelihood                                            |                 | -1197.707 |           |                 | -1256.644 |           |
| AIC                                                      |                 | 2463.413  |           |                 | 2581.288  |           |
| <b>Omnibus tests</b>                                     |                 |           |           |                 |           |           |
| Chi-square                                               |                 | 137.355   |           |                 | 163.390   |           |
| df                                                       |                 | 33        |           |                 | 33        |           |
| N                                                        |                 | 1858      |           |                 | 1993      |           |

Note: Participants reporting Native Hawaiian/Pacific Islander, Middle east/North Africa or Other as ethnicity are the reference group for the ethnicity variables. Personal Income < \$10,000 is the reference group for the "Personal Income" variables. Educational level < high school diploma is the reference group for the "Educational Level" variables. The models are computed with robust covariance matrix estimation.

**Table S37.** Negative binomial regression predicting number of days with poor physical health (during past 30 days) (combined samples).

|                                                          | <i>SEX</i>      |            |           | <i>GENDER</i>   |            |             |
|----------------------------------------------------------|-----------------|------------|-----------|-----------------|------------|-------------|
|                                                          | Incidence ratio | rate       | 99.9% CI  | Incidence ratio | rate       | 99.9% CI    |
| Caregiver strain                                         |                 | 1.15       | 1.06 1.25 |                 | 1.152      | 1.063 1.248 |
| Work strain                                              |                 | 0.98       | 0.88 1.08 |                 | 0.978      | 0.883 1.084 |
| Independence                                             |                 | 0.90       | 0.80 1.02 |                 | 0.902      | 0.801 1.016 |
| Risk-taking                                              |                 | 0.98       | 0.89 1.09 |                 | 0.979      | 0.884 1.083 |
| Emotional intelligence                                   |                 | 0.94       | 0.84 1.05 |                 | 0.938      | 0.839 1.049 |
| Social support                                           |                 | 0.95       | 0.87 1.03 |                 | 0.946      | 0.874 1.025 |
| Discrimination                                           |                 | 1.45       | 1.30 1.61 |                 | 1.446      | 1.305 1.603 |
| Year of birth                                            |                 | 0.99       | 0.98 0.99 |                 | 0.988      | 0.981 0.994 |
| Personal Income (\$10,000-\$19,999)                      |                 | 1.06       | 0.80 1.40 |                 | 1.063      | 0.804 1.406 |
| Personal Income (\$20,000-\$29,999)                      |                 | 0.99       | 0.75 1.30 |                 | 0.986      | 0.748 1.300 |
| Personal Income (\$30,000-\$39,999)                      |                 | 0.87       | 0.63 1.19 |                 | 0.868      | 0.632 1.191 |
| Personal Income (\$40,000-\$49,999)                      |                 | 0.85       | 0.62 1.17 |                 | 0.852      | 0.619 1.174 |
| Personal Income (\$50,000-\$59,999)                      |                 | 0.79       | 0.54 1.15 |                 | 0.794      | 0.545 1.156 |
| Personal Income (\$60,000-\$69,999)                      |                 | 0.76       | 0.52 1.12 |                 | 0.766      | 0.524 1.118 |
| Personal Income (\$70,000-\$79,999)                      |                 | 0.70       | 0.45 1.09 |                 | 0.701      | 0.447 1.098 |
| Personal Income (\$80,000-\$89,999)                      |                 | 0.54       | 0.33 0.89 |                 | 0.538      | 0.327 0.886 |
| Personal Income (\$90,000-\$99,999)                      |                 | 0.89       | 0.49 1.60 |                 | 0.922      | 0.516 1.647 |
| Personal Income (\$100,000-\$149,999)                    |                 | 0.72       | 0.46 1.13 |                 | 0.721      | 0.458 1.134 |
| Personal Income (More than \$150,000)                    |                 | 0.99       | 0.56 1.75 |                 | 1.055      | 0.598 1.859 |
| Educational Level (High school graduate)                 |                 | 0.95       | 0.51 1.77 |                 | 0.951      | 0.510 1.772 |
| Educational Level (Some college credit, no degree)       |                 | 0.96       | 0.53 1.75 |                 | 0.970      | 0.535 1.759 |
| Educational Level (Trade/Technical/Vocational education) |                 | 0.84       | 0.43 1.67 |                 | 0.840      | 0.425 1.662 |
| Educational Level (Associate degree)                     |                 | 0.88       | 0.48 1.63 |                 | 0.877      | 0.474 1.622 |
| Educational Level (Bachelor's degree)                    |                 | 0.78       | 0.43 1.41 |                 | 0.779      | 0.431 1.408 |
| Educational Level (Master's degree)                      |                 | 0.86       | 0.46 1.61 |                 | 0.860      | 0.459 1.612 |
| Educational Level (professional degree)                  |                 | 0.80       | 0.30 2.14 |                 | 0.792      | 0.295 2.122 |
| Educational Level (Doctorate degree)                     |                 | 0.70       | 0.33 1.48 |                 | 0.695      | 0.328 1.471 |
| Ethnicity (White)                                        |                 | 0.98       | 0.70 1.35 |                 | 0.950      | 0.685 1.318 |
| Ethnicity (Hispanic, Latinx, Spanish)                    |                 | 0.97       | 0.66 1.42 |                 | 0.953      | 0.652 1.393 |
| Ethnicity (Black, African American)                      |                 | 0.89       | 0.62 1.27 |                 | 0.873      | 0.610 1.248 |
| Ethnicity (Asian)                                        |                 | 0.83       | 0.55 1.24 |                 | 0.808      | 0.538 1.214 |
| Ethnicity (Native)                                       |                 | 1.24       | 0.79 1.94 |                 | 1.236      | 0.790 1.935 |
| Sex (male=0, female=1)                                   |                 | 0.92       | 0.77 1.11 |                 |            |             |
| Woman                                                    |                 |            |           |                 | 0.926      | 0.773 1.109 |
| Non-binary/Gender fluid + Gender=other                   |                 |            |           |                 | 0.844      | 0.381 1.871 |
| Sample (Sample 1=1)                                      |                 | 0.82       | 0.65 1.02 |                 | 0.816      | 0.652 1.022 |
| <b>Goodness of Fit</b>                                   |                 |            |           |                 |            |             |
| Deviance/df                                              |                 | 1.107      |           |                 | 1.107      |             |
| Pearson Chi-Square/df                                    |                 | 1.198      |           |                 | 1.197      |             |
| Loglikelihood                                            |                 | -10001.663 |           |                 | -10032.722 |             |
| AIC                                                      |                 | 20075.326  |           |                 | 20139.445  |             |
| <b>Omnibus tests</b>                                     |                 |            |           |                 |            |             |
| Chi-square                                               |                 | 340.684    |           |                 | 345.482    |             |
| df                                                       |                 | 34         |           |                 | 35         |             |
| N                                                        |                 | 3879       |           |                 | 3889       |             |

Note: Participants reporting Native Hawaiian/Pacific Islander, Middle east/North Africa or Other as ethnicity are the reference group for the ethnicity variables. Personal Income < \$10,000 is the reference group for the "Personal Income" variables. Educational level < high school diploma is the reference group for the "Educational Level" variables. The models are computed with robust covariance matrix estimation.

**Table S38.** Negative binomial regression predicting number of days with mental health (during past 30 days) (combined samples).

|                                                          | <i>SEX</i>      |            |          | <i>GENDER</i>   |      |            |      |      |
|----------------------------------------------------------|-----------------|------------|----------|-----------------|------|------------|------|------|
|                                                          | Incidence ratio | rate       | 99.9% CI | Incidence ratio | rate | 99.9% CI   |      |      |
| Caregiver strain                                         |                 | 1.20       | 1.12     | 1.28            |      | 1.20       | 1.13 | 1.28 |
| Work strain                                              |                 | 1.07       | 0.98     | 1.17            |      | 1.07       | 0.98 | 1.17 |
| Independence                                             |                 | 0.93       | 0.84     | 1.02            |      | 0.93       | 0.84 | 1.02 |
| Risk-taking                                              |                 | 0.92       | 0.84     | 1.01            |      | 0.92       | 0.84 | 1.01 |
| Emotional intelligence                                   |                 | 0.91       | 0.83     | 1.01            |      | 0.91       | 0.83 | 1.01 |
| Social support                                           |                 | 0.83       | 0.78     | 0.89            |      | 0.84       | 0.78 | 0.90 |
| Discrimination                                           |                 | 1.40       | 1.28     | 1.54            |      | 1.40       | 1.28 | 1.53 |
| Year of birth                                            |                 | 1.02       | 1.01     | 1.02            |      | 1.02       | 1.01 | 1.02 |
| Personal Income (\$10,000-\$19,999)                      |                 | 0.99       | 0.79     | 1.23            |      | 0.99       | 0.79 | 1.23 |
| Personal Income (\$20,000-\$29,999)                      |                 | 0.83       | 0.65     | 1.06            |      | 0.84       | 0.66 | 1.07 |
| Personal Income (\$30,000-\$39,999)                      |                 | 0.81       | 0.63     | 1.04            |      | 0.81       | 0.63 | 1.04 |
| Personal Income (\$40,000-\$49,999)                      |                 | 0.69       | 0.53     | 0.90            |      | 0.69       | 0.53 | 0.90 |
| Personal Income (\$50,000-\$59,999)                      |                 | 0.66       | 0.49     | 0.90            |      | 0.66       | 0.49 | 0.90 |
| Personal Income (\$60,000-\$69,999)                      |                 | 0.65       | 0.47     | 0.90            |      | 0.65       | 0.47 | 0.90 |
| Personal Income (\$70,000-\$79,999)                      |                 | 0.61       | 0.41     | 0.90            |      | 0.61       | 0.41 | 0.90 |
| Personal Income (\$80,000-\$89,999)                      |                 | 0.76       | 0.44     | 1.30            |      | 0.75       | 0.44 | 1.28 |
| Personal Income (\$90,000-\$99,999)                      |                 | 0.78       | 0.46     | 1.34            |      | 0.77       | 0.45 | 1.32 |
| Personal Income (\$100,000-\$149,999)                    |                 | 0.63       | 0.41     | 0.96            |      | 0.63       | 0.41 | 0.95 |
| Personal Income (More than \$150,000)                    |                 | 0.76       | 0.44     | 1.30            |      | 0.79       | 0.46 | 1.36 |
| Educational Level (High school graduate)                 |                 | 1.14       | 0.65     | 2.01            |      | 1.14       | 0.65 | 2.00 |
| Educational Level (Some college credit, no degree)       |                 | 1.18       | 0.69     | 2.04            |      | 1.18       | 0.68 | 2.03 |
| Educational Level (Trade/Technical/Vocational education) |                 | 1.32       | 0.69     | 2.53            |      | 1.32       | 0.69 | 2.53 |
| Educational Level (Associate degree)                     |                 | 1.13       | 0.64     | 1.99            |      | 1.12       | 0.64 | 1.98 |
| Educational Level (Bachelor's degree)                    |                 | 1.02       | 0.60     | 1.75            |      | 1.02       | 0.59 | 1.75 |
| Educational Level (Master's degree)                      |                 | 1.17       | 0.66     | 2.07            |      | 1.17       | 0.66 | 2.07 |
| Educational Level (professional degree)                  |                 | 1.05       | 0.46     | 2.43            |      | 1.04       | 0.45 | 2.40 |
| Educational Level (Doctorate degree)                     |                 | 1.15       | 0.58     | 2.29            |      | 1.14       | 0.57 | 2.27 |
| Ethnicity (White)                                        |                 | 1.37       | 1.03     | 1.83            |      | 1.34       | 1.00 | 1.79 |
| Ethnicity (Hispanic, Latinx, Spanish)                    |                 | 1.07       | 0.80     | 1.43            |      | 1.06       | 0.79 | 1.42 |
| Ethnicity (Black, African American)                      |                 | 1.07       | 0.78     | 1.45            |      | 1.05       | 0.77 | 1.43 |
| Ethnicity (Asian)                                        |                 | 1.04       | 0.73     | 1.48            |      | 1.02       | 0.72 | 1.46 |
| Ethnicity (Native)                                       |                 | 1.47       | 0.93     | 2.30            |      | 1.46       | 0.93 | 2.29 |
| Sex (male=0, female=1)                                   |                 | 1.05       | 0.89     | 1.23            |      |            |      |      |
| Woman                                                    |                 |            |          |                 |      | 1.05       | 0.89 | 1.23 |
| Non-binary/Gender fluid + Gender=other                   |                 |            |          |                 |      | 1.23       | 0.78 | 1.93 |
| Sample (Sample 1=1)                                      |                 | 0.90       | 0.75     | 1.09            |      | 0.91       | 0.75 | 1.09 |
| <b>Goodness of Fit</b>                                   |                 |            |          |                 |      |            |      |      |
| Deviance/df                                              |                 |            | 1.145    |                 |      | 1.146      |      |      |
| Pearson Chi-Square/df                                    |                 |            | 1.059    |                 |      | 1.058      |      |      |
| Loglikelihood                                            |                 | -11254.537 |          |                 |      | -11285.196 |      |      |
| AIC                                                      |                 | 22581.073  |          |                 |      | 22644.392  |      |      |
| <b>Omnibus tests</b>                                     |                 |            |          |                 |      |            |      |      |
| Chi-square                                               |                 |            | 567.157  |                 |      | 568.564    |      |      |
| df                                                       |                 |            | 34       |                 |      | 35         |      |      |
| N                                                        |                 |            | 3880     |                 |      | 3890       |      |      |

**Table S39.** Negative binomial regression predicting number of days where poor mental or physical health prevented the respondent from doing usual activities (during past 30 days) (combined samples).

|                                                          | <i>SEX</i>      |           |           | <i>GENDER</i>   |           |           |
|----------------------------------------------------------|-----------------|-----------|-----------|-----------------|-----------|-----------|
|                                                          | Incidence ratio | rate      | 99.9% CI  | Incidence ratio | rate      | 99.9% CI  |
| Caregiver strain                                         |                 | 1.12      | 1.02 1.23 |                 | 1.12      | 1.02 1.23 |
| Work strain                                              |                 | 0.94      | 0.84 1.05 |                 | 0.94      | 0.84 1.05 |
| Independence                                             |                 | 0.97      | 0.86 1.10 |                 | 0.98      | 0.86 1.11 |
| Risk-taking                                              |                 | 0.98      | 0.88 1.10 |                 | 0.98      | 0.88 1.09 |
| Emotional intelligence                                   |                 | 0.96      | 0.85 1.09 |                 | 0.96      | 0.85 1.09 |
| Social support                                           |                 | 0.90      | 0.82 0.98 |                 | 0.90      | 0.82 0.98 |
| Discrimination                                           |                 | 1.65      | 1.47 1.86 |                 | 1.65      | 1.47 1.85 |
| Year of birth                                            |                 | 1.00      | 1.00 1.01 |                 | 1.00      | 1.00 1.01 |
| Personal Income (\$10,000-\$19,999)                      |                 | 0.96      | 0.72 1.29 |                 | 0.96      | 0.72 1.29 |
| Personal Income (\$20,000-\$29,999)                      |                 | 0.92      | 0.69 1.24 |                 | 0.93      | 0.70 1.24 |
| Personal Income (\$30,000-\$39,999)                      |                 | 0.76      | 0.55 1.07 |                 | 0.77      | 0.55 1.07 |
| Personal Income (\$40,000-\$49,999)                      |                 | 0.75      | 0.53 1.07 |                 | 0.76      | 0.53 1.08 |
| Personal Income (\$50,000-\$59,999)                      |                 | 0.62      | 0.42 0.91 |                 | 0.63      | 0.43 0.92 |
| Personal Income (\$60,000-\$69,999)                      |                 | 0.63      | 0.41 0.97 |                 | 0.64      | 0.42 0.98 |
| Personal Income (\$70,000-\$79,999)                      |                 | 0.63      | 0.38 1.03 |                 | 0.64      | 0.39 1.04 |
| Personal Income (\$80,000-\$89,999)                      |                 | 0.76      | 0.42 1.38 |                 | 0.76      | 0.42 1.38 |
| Personal Income (\$90,000-\$99,999)                      |                 | 0.77      | 0.40 1.47 |                 | 0.84      | 0.44 1.62 |
| Personal Income (\$100,000-\$149,999)                    |                 | 0.80      | 0.47 1.36 |                 | 0.80      | 0.47 1.37 |
| Personal Income (More than \$150,000)                    |                 | 1.15      | 0.59 2.22 |                 | 1.21      | 0.63 2.32 |
| Educational Level (High school graduate)                 |                 | 1.02      | 0.51 2.02 |                 | 1.02      | 0.51 2.02 |
| Educational Level (Some college credit, no degree)       |                 | 0.97      | 0.51 1.86 |                 | 0.97      | 0.51 1.88 |
| Educational Level (Trade/Technical/Vocational education) |                 | 0.96      | 0.45 2.03 |                 | 0.96      | 0.45 2.03 |
| Educational Level (Associate degree)                     |                 | 0.88      | 0.44 1.74 |                 | 0.87      | 0.44 1.74 |
| Educational Level (Bachelor's degree)                    |                 | 0.81      | 0.42 1.54 |                 | 0.80      | 0.42 1.54 |
| Educational Level (Master's degree)                      |                 | 0.72      | 0.36 1.43 |                 | 0.71      | 0.36 1.41 |
| Educational Level (professional degree)                  |                 | 0.41      | 0.15 1.11 |                 | 0.40      | 0.15 1.07 |
| Educational Level (Doctorate degree)                     |                 | 0.66      | 0.30 1.46 |                 | 0.65      | 0.30 1.43 |
| Ethnicity (White)                                        |                 | 0.98      | 0.70 1.38 |                 | 0.96      | 0.68 1.35 |
| Ethnicity (Hispanic, Latinx, Spanish)                    |                 | 0.93      | 0.63 1.36 |                 | 0.92      | 0.62 1.34 |
| Ethnicity (Black, African American)                      |                 | 0.86      | 0.59 1.28 |                 | 0.85      | 0.57 1.25 |
| Ethnicity (Asian)                                        |                 | 0.76      | 0.50 1.16 |                 | 0.75      | 0.49 1.13 |
| Ethnicity (Native)                                       |                 | 1.45      | 0.80 2.61 |                 | 1.44      | 0.80 2.60 |
| Sex (male=0, female=1)                                   |                 | 0.99      | 0.81 1.21 |                 |           |           |
| Woman                                                    |                 |           |           |                 | 0.99      | 0.81 1.20 |
| Non-binary/Gender fluid + Gender=other                   |                 |           |           |                 | 1.18      | 0.56 2.49 |
| Sample (Sample 1=1)                                      |                 | 0.94      | 0.74 1.20 |                 | 0.95      | 0.74 1.21 |
| <b>Goodness of Fit</b>                                   |                 |           |           |                 |           |           |
| Deviance/df                                              |                 | 1.059     |           |                 | 1.060     |           |
| Pearson Chi-Square/df                                    |                 | 1.148     |           |                 | 1.145     |           |
| Loglikelihood                                            |                 | -9221.048 |           |                 | -9251.865 |           |
| AIC                                                      |                 | 18514.096 |           |                 | 18577.731 |           |
| <b>Omnibus tests</b>                                     |                 |           |           |                 |           |           |
| Chi-square                                               |                 | 425.819   |           |                 | 428.103   |           |
| df                                                       |                 | 34        |           |                 | 35        |           |
| N                                                        |                 | 3876      |           |                 | 3886      |           |

Note: Participants reporting Native Hawaiian/Pacific Islander, Middle east/North Africa or Other as ethnicity are the reference group for the ethnicity variables. Personal Income < \$10,000 is the reference group for the "Personal Income" variables. Educational level < high school diploma is the reference group for the "Educational Level" variables. The models are computed with robust covariance matrix estimation.



**Table S40.** Logistic regression predicting general health status (excellent, very good, good= 0, fair, poor= 1) (combined samples).

|                                                          | <i>SEX</i> |          |      | <i>GENDER</i> |          |      |
|----------------------------------------------------------|------------|----------|------|---------------|----------|------|
|                                                          | Odds ratio | 99.9% CI |      | Odds ratio    | 99.9% CI |      |
| Caregiver strain                                         | 1.21       | 1.04     | 1.42 | 1.21          | 1.03     | 1.42 |
| Work strain                                              | 0.93       | 0.76     | 1.15 | 0.93          | 0.76     | 1.14 |
| Independence                                             | 0.83       | 0.66     | 1.03 | 0.83          | 0.66     | 1.03 |
| Risk-taking                                              | 0.63       | 0.52     | 0.77 | 0.62          | 0.51     | 0.76 |
| Emotional intelligence                                   | 0.89       | 0.72     | 1.10 | 0.89          | 0.72     | 1.11 |
| Social support                                           | 0.81       | 0.70     | 0.94 | 0.81          | 0.70     | 0.94 |
| Discrimination                                           | 1.48       | 1.19     | 1.85 | 1.49          | 1.20     | 1.86 |
| Year of birth                                            | 0.98       | 0.97     | 0.99 | 0.98          | 0.97     | 0.99 |
| Personal Income (\$10,000-\$19,999)                      | 0.95       | 0.59     | 1.54 | 0.95          | 0.59     | 1.54 |
| Personal Income (\$20,000-\$29,999)                      | 0.81       | 0.49     | 1.35 | 0.81          | 0.49     | 1.35 |
| Personal Income (\$30,000-\$39,999)                      | 0.71       | 0.40     | 1.25 | 0.71          | 0.41     | 1.25 |
| Personal Income (\$40,000-\$49,999)                      | 0.67       | 0.37     | 1.23 | 0.67          | 0.37     | 1.23 |
| Personal Income (\$50,000-\$59,999)                      | 0.57       | 0.29     | 1.09 | 0.57          | 0.29     | 1.09 |
| Personal Income (\$60,000-\$69,999)                      | 0.79       | 0.38     | 1.62 | 0.79          | 0.39     | 1.63 |
| Personal Income (\$70,000-\$79,999)                      | 0.61       | 0.27     | 1.38 | 0.61          | 0.27     | 1.38 |
| Personal Income (\$80,000-\$89,999)                      | 0.35       | 0.10     | 1.29 | 0.35          | 0.10     | 1.29 |
| Personal Income (\$90,000-\$99,999)                      | 0.66       | 0.20     | 2.12 | 0.69          | 0.22     | 2.12 |
| Personal Income (\$100,000-\$149,999)                    | 0.37       | 0.14     | 0.97 | 0.37          | 0.14     | 0.98 |
| Personal Income (More than \$150,000)                    | 0.30       | 0.06     | 1.58 | 0.30          | 0.06     | 1.59 |
| Educational Level (High school graduate)                 | 0.59       | 0.19     | 1.84 | 0.59          | 0.19     | 1.85 |
| Educational Level (Some college credit, no degree)       | 0.71       | 0.24     | 2.10 | 0.71          | 0.24     | 2.10 |
| Educational Level (Trade/Technical/Vocational education) | 0.65       | 0.18     | 2.31 | 0.65          | 0.18     | 2.31 |
| Educational Level (Associate degree)                     | 0.68       | 0.22     | 2.10 | 0.68          | 0.22     | 2.10 |
| Educational Level (Bachelor's degree)                    | 0.43       | 0.15     | 1.28 | 0.44          | 0.15     | 1.29 |
| Educational Level (Master's degree)                      | 0.40       | 0.13     | 1.28 | 0.40          | 0.12     | 1.28 |
| Educational Level (professional degree)                  | 0.27       | 0.04     | 1.87 | 0.27          | 0.04     | 1.87 |
| Educational Level (Doctorate degree)                     | 0.33       | 0.07     | 1.49 | 0.32          | 0.07     | 1.49 |
| Ethnicity (White)                                        | 1.31       | 0.64     | 2.67 | 1.31          | 0.64     | 2.67 |
| Ethnicity (Hispanic, Latinx, Spanish)                    | 0.95       | 0.44     | 2.04 | 0.95          | 0.44     | 2.05 |
| Ethnicity (Black, African American)                      | 1.30       | 0.61     | 2.79 | 1.33          | 0.62     | 2.84 |
| Ethnicity (Asian)                                        | 1.14       | 0.48     | 2.67 | 1.13          | 0.48     | 2.65 |
| Ethnicity (Native)                                       | 0.69       | 0.26     | 1.86 | 0.69          | 0.26     | 1.86 |
| Sex (male=0, female=1)                                   | 0.64       | 0.45     | 0.91 |               |          |      |
| Woman                                                    |            |          |      | 0.62          | 0.44     | 0.88 |
| Non-binary/Gender fluid + Gender=other                   |            |          |      | 0.84          | 0.19     | 3.72 |
| Sample (Sample 1=1)                                      | 0.79       | 0.52     | 1.18 | 0.79          | 0.52     | 1.18 |
| <b>Goodness of Fit</b>                                   |            |          |      |               |          |      |
| Deviance/df                                              | 0.857      |          |      | 0.857         |          |      |
| Pearson Chi-Square/df                                    | 1.006      |          |      | 1.010         |          |      |
| Loglikelihood                                            | -1656.691  |          |      | -1653.960     |          |      |
| AIC                                                      | 3385.382   |          |      | 3377.919      |          |      |
| <b>Omnibus tests</b>                                     |            |          |      | 351.378       |          |      |
| Chi-square                                               | 358.997    |          |      | 351.378       |          |      |
| df                                                       |            |          |      | 34            |          |      |
| N                                                        | 3894       |          |      | 3904          |          |      |

Note: Participants reporting Native Hawaiian/Pacific Islander, Middle east/North Africa or Other as ethnicity are the reference group for the ethnicity variables. Personal Income < \$10,000 is the reference group for the "Personal Income" variables. Educational level < high school diploma is the reference group for the "Educational Level" variables. The models are computed with robust covariance matrix estimation.

**Table S41.** Logistic regression predicting smoking (not smoking=0, smoking=1) (combined samples).

|                                                          | <i>SEX</i> |          |      | <i>GENDER</i> |          |      |
|----------------------------------------------------------|------------|----------|------|---------------|----------|------|
|                                                          | Odds ratio | 99.9% CI |      | Odds ratio    | 99.9% CI |      |
| Caregiver strain                                         | 1.29       | 1.12     | 1.50 | 1.29          | 1.12     | 1.50 |
| Work strain                                              | 1.31       | 1.08     | 1.58 | 1.30          | 1.08     | 1.57 |
| Independence                                             | 1.19       | 0.95     | 1.48 | 1.19          | 0.95     | 1.49 |
| Risk-taking                                              | 1.20       | 1.00     | 1.44 | 1.21          | 1.01     | 1.45 |
| Emotional intelligence                                   | 1.28       | 1.06     | 1.55 | 1.28          | 1.06     | 1.55 |
| Social support                                           | 0.98       | 0.85     | 1.12 | 0.97          | 0.85     | 1.12 |
| Discrimination                                           | 1.16       | 0.94     | 1.43 | 1.17          | 0.95     | 1.44 |
| Year of birth                                            | 0.99       | 0.98     | 1.00 | 0.99          | 0.98     | 1.00 |
| Personal Income (\$10,000-\$19,999)                      | 1.21       | 0.71     | 2.05 | 1.22          | 0.72     | 2.08 |
| Personal Income (\$20,000-\$29,999)                      | 1.13       | 0.67     | 1.93 | 1.13          | 0.66     | 1.93 |
| Personal Income (\$30,000-\$39,999)                      | 1.08       | 0.61     | 1.92 | 1.10          | 0.62     | 1.94 |
| Personal Income (\$40,000-\$49,999)                      | 1.04       | 0.57     | 1.88 | 1.04          | 0.57     | 1.88 |
| Personal Income (\$50,000-\$59,999)                      | 1.01       | 0.54     | 1.88 | 1.01          | 0.54     | 1.89 |
| Personal Income (\$60,000-\$69,999)                      | 1.08       | 0.53     | 2.17 | 1.08          | 0.54     | 2.18 |
| Personal Income (\$70,000-\$79,999)                      | 1.09       | 0.52     | 2.28 | 1.10          | 0.53     | 2.29 |
| Personal Income (\$80,000-\$89,999)                      | 1.05       | 0.40     | 2.73 | 1.06          | 0.41     | 2.75 |
| Personal Income (\$90,000-\$99,999)                      | 1.00       | 0.37     | 2.71 | 0.98          | 0.36     | 2.65 |
| Personal Income (\$100,000-\$149,999)                    | 0.99       | 0.47     | 2.09 | 0.99          | 0.47     | 2.10 |
| Personal Income (More than \$150,000)                    | 2.53       | 1.07     | 6.01 | 2.46          | 1.03     | 5.84 |
| Educational Level (High school graduate)                 | 1.00       | 0.29     | 3.42 | 1.01          | 0.29     | 3.44 |
| Educational Level (Some college credit, no degree)       | 0.87       | 0.26     | 2.89 | 0.88          | 0.26     | 2.92 |
| Educational Level (Trade/Technical/Vocational education) | 1.37       | 0.36     | 5.15 | 1.37          | 0.36     | 5.14 |
| Educational Level (Associate degree)                     | 0.82       | 0.24     | 2.83 | 0.82          | 0.24     | 2.82 |
| Educational Level (Bachelor's degree)                    | 0.40       | 0.12     | 1.33 | 0.40          | 0.12     | 1.34 |
| Educational Level (Master's degree)                      | 0.39       | 0.11     | 1.34 | 0.39          | 0.11     | 1.35 |
| Educational Level (professional degree)                  | 0.41       | 0.07     | 2.29 | 0.42          | 0.08     | 2.31 |
| Educational Level (Doctorate degree)                     | 0.52       | 0.12     | 2.20 | 0.53          | 0.12     | 2.24 |
| Ethnicity (White)                                        | 0.89       | 0.44     | 1.83 | 0.90          | 0.44     | 1.85 |
| Ethnicity (Hispanic, Latinx, Spanish)                    | 0.62       | 0.29     | 1.31 | 0.62          | 0.30     | 1.31 |
| Ethnicity (Black, African American)                      | 0.51       | 0.22     | 1.18 | 0.51          | 0.22     | 1.19 |
| Ethnicity (Asian)                                        | 0.31       | 0.11     | 0.84 | 0.31          | 0.11     | 0.83 |
| Ethnicity (Native)                                       | 1.24       | 0.54     | 2.89 | 1.27          | 0.54     | 2.97 |
| Sex (male=0, female=1)                                   | 0.77       | 0.56     | 1.07 |               |          |      |
| Woman                                                    |            |          |      | 0.78          | 0.56     | 1.07 |
| Non-binary/Gender fluid + Gender=other                   |            |          |      | 0.19          | 0.02     | 2.07 |
| Sample (Sample 1=1)                                      | 1.44       | 0.94     | 2.20 | 1.45          | 0.95     | 2.22 |
| <b>Goodness of Fit</b>                                   |            |          |      |               |          |      |
| Deviance/df                                              | 0.936      |          |      | 0.934         |          |      |
| Pearson Chi-Square/df                                    | 0.986      |          |      | 0.983         |          |      |
| Loglikelihood                                            | -1804.942  |          |      | -1804.685     |          |      |
| AIC                                                      | 3679.885   |          |      | 3681.370      |          |      |
| <b>Omnibus tests</b>                                     |            |          |      |               |          |      |
| Chi-square                                               | 322.659    |          |      | 329.998       |          |      |
| df                                                       | 34         |          |      | 35            |          |      |
| N                                                        | 3892       |          |      | 3901          |          |      |

Note: Participants reporting Native Hawaiian/Pacific Islander, Middle east/North Africa or Other as ethnicity are the reference group for the ethnicity variables. Personal Income < \$10,000 is the reference group for the "Personal Income" variables. Educational level < high school diploma is the reference group for the "Educational Level" variables. The models are computed with robust covariance matrix estimation.

**Table S42.** Logistic regression predicting vaping (not vaping=0, vaping=1) (combined samples).

|                                                          | <i>SEX</i> |          |       | <i>GENDER</i> |          |       |
|----------------------------------------------------------|------------|----------|-------|---------------|----------|-------|
|                                                          | Odds ratio | 99.9% CI |       | Odds ratio    | 99.9% CI |       |
| Caregiver strain                                         | 1.10       | 0.91     | 1.32  | 1.10          | 0.91     | 1.32  |
| Work strain                                              | 1.27       | 0.98     | 1.64  | 1.26          | 0.98     | 1.63  |
| Independence                                             | 1.15       | 0.86     | 1.52  | 1.15          | 0.87     | 1.53  |
| Risk-taking                                              | 1.10       | 0.86     | 1.41  | 1.10          | 0.86     | 1.40  |
| Emotional intelligence                                   | 1.25       | 0.97     | 1.60  | 1.25          | 0.97     | 1.60  |
| Social support                                           | 0.93       | 0.78     | 1.11  | 0.93          | 0.78     | 1.12  |
| Discrimination                                           | 1.44       | 1.13     | 1.82  | 1.44          | 1.14     | 1.83  |
| Year of birth                                            | 1.00       | 0.99     | 1.02  | 1.00          | 0.99     | 1.02  |
| Personal Income (\$10,000-\$19,999)                      | 1.59       | 0.70     | 3.57  | 1.55          | 0.70     | 3.47  |
| Personal Income (\$20,000-\$29,999)                      | 1.80       | 0.83     | 3.90  | 1.75          | 0.81     | 3.76  |
| Personal Income (\$30,000-\$39,999)                      | 1.70       | 0.76     | 3.78  | 1.65          | 0.75     | 3.65  |
| Personal Income (\$40,000-\$49,999)                      | 1.50       | 0.63     | 3.56  | 1.46          | 0.62     | 3.45  |
| Personal Income (\$50,000-\$59,999)                      | 1.93       | 0.83     | 4.49  | 1.89          | 0.82     | 4.36  |
| Personal Income (\$60,000-\$69,999)                      | 2.00       | 0.80     | 4.99  | 1.94          | 0.78     | 4.82  |
| Personal Income (\$70,000-\$79,999)                      | 1.27       | 0.44     | 3.64  | 1.23          | 0.43     | 3.51  |
| Personal Income (\$80,000-\$89,999)                      | 0.89       | 0.19     | 4.08  | 0.86          | 0.19     | 3.94  |
| Personal Income (\$90,000-\$99,999)                      | 2.26       | 0.68     | 7.48  | 2.17          | 0.66     | 7.13  |
| Personal Income (\$100,000-\$149,999)                    | 1.53       | 0.55     | 4.25  | 1.49          | 0.54     | 4.11  |
| Personal Income (More than \$150,000)                    | 4.37       | 1.60     | 11.96 | 4.41          | 1.63     | 11.95 |
| Educational Level (High school graduate)                 | 0.48       | 0.12     | 1.93  | 0.48          | 0.12     | 1.93  |
| Educational Level (Some college credit, no degree)       | 0.43       | 0.11     | 1.65  | 0.44          | 0.12     | 1.67  |
| Educational Level (Trade/Technical/Vocational education) | 0.34       | 0.06     | 1.84  | 0.35          | 0.06     | 1.86  |
| Educational Level (Associate degree)                     | 0.54       | 0.14     | 2.14  | 0.55          | 0.14     | 2.16  |
| Educational Level (Bachelor's degree)                    | 0.31       | 0.08     | 1.17  | 0.32          | 0.08     | 1.20  |
| Educational Level (Master's degree)                      | 0.35       | 0.09     | 1.40  | 0.36          | 0.09     | 1.43  |
| Educational Level (professional degree)                  | 0.35       | 0.05     | 2.53  | 0.35          | 0.05     | 2.53  |
| Educational Level (Doctorate degree)                     | 0.36       | 0.07     | 1.93  | 0.37          | 0.07     | 1.97  |
| Ethnicity (White)                                        | 1.38       | 0.65     | 2.95  | 1.31          | 0.61     | 2.79  |
| Ethnicity (Hispanic, Latinx, Spanish)                    | 1.28       | 0.55     | 2.97  | 1.25          | 0.53     | 2.91  |
| Ethnicity (Black, African American)                      | 1.00       | 0.41     | 2.45  | 1.01          | 0.41     | 2.46  |
| Ethnicity (Asian)                                        | 0.85       | 0.33     | 2.20  | 0.80          | 0.30     | 2.10  |
| Ethnicity (Native)                                       | 1.55       | 0.55     | 4.33  | 1.58          | 0.56     | 4.41  |
| Sex (male=0, female=1)                                   | 0.57       | 0.37     | 0.88  |               |          |       |
| Woman                                                    |            |          |       | 0.56          | 0.37     | 0.86  |
| Non-binary/Gender fluid + Gender=other                   |            |          |       | 0.42          | 0.05     | 3.62  |
| Sample (Sample 1=1)                                      | 0.89       | 0.51     | 1.55  | 0.89          | 0.52     | 1.55  |
| <b>Goodness of Fit</b>                                   |            |          |       |               |          |       |
| Deviance/df                                              | 0.618      |          |       | 0.618         |          |       |
| Pearson Chi-Square/df                                    | 1.027      |          |       | 1.033         |          |       |
| Loglikelihood                                            | 2451.495   |          |       | -1194.642     |          |       |
| AIC                                                      | 2452.148   |          |       | 2461.285      |          |       |
| <b>Omnibus tests</b>                                     |            |          |       |               |          |       |
| Chi-square                                               | 174.129    |          |       | 176.985       |          |       |
| df                                                       | 34         |          |       | 35            |          |       |
| N                                                        | 3891       |          |       | 3900          |          |       |

Note: Participants reporting Native Hawaiian/Pacific Islander, Middle east/North Africa or Other as ethnicity are the reference group for the ethnicity variables. Personal Income < \$10,000 is the reference group for the "Personal Income" variables. Educational level < high school diploma is the reference group for the "Educational Level" variables. The models are computed with robust covariance matrix estimation.

**Table S43.** Logistic regression predicting binge drinking (less than monthly=0, monthly, weekly, and daily=1) (combined samples).

|                                                          | <i>SEX</i> |          |      | <i>GENDER</i> |          |      |
|----------------------------------------------------------|------------|----------|------|---------------|----------|------|
|                                                          | Odds ratio | 99.9% CI |      | Odds ratio    | 99.9% CI |      |
| Caregiver strain                                         | 0.93       | 0.80     | 1.09 | 0.93          | 0.79     | 1.09 |
| Work strain                                              | 1.15       | 0.95     | 1.39 | 1.15          | 0.95     | 1.39 |
| Independence                                             | 1.12       | 0.92     | 1.36 | 1.12          | 0.91     | 1.36 |
| Risk-taking                                              | 1.37       | 1.15     | 1.64 | 1.37          | 1.15     | 1.64 |
| Emotional intelligence                                   | 1.12       | 0.93     | 1.35 | 1.12          | 0.93     | 1.35 |
| Social support                                           | 0.94       | 0.82     | 1.07 | 0.93          | 0.82     | 1.07 |
| Discrimination                                           | 1.16       | 0.95     | 1.42 | 1.16          | 0.96     | 1.42 |
| Year of birth                                            | 1.02       | 1.01     | 1.04 | 1.02          | 1.01     | 1.04 |
| Personal Income (\$10,000-\$19,999)                      | 1.16       | 0.67     | 2.00 | 1.16          | 0.67     | 2.01 |
| Personal Income (\$20,000-\$29,999)                      | 1.60       | 0.94     | 2.70 | 1.59          | 0.94     | 2.68 |
| Personal Income (\$30,000-\$39,999)                      | 1.29       | 0.74     | 2.26 | 1.29          | 0.74     | 2.26 |
| Personal Income (\$40,000-\$49,999)                      | 1.58       | 0.89     | 2.80 | 1.58          | 0.89     | 2.81 |
| Personal Income (\$50,000-\$59,999)                      | 1.14       | 0.63     | 2.09 | 1.15          | 0.63     | 2.11 |
| Personal Income (\$60,000-\$69,999)                      | 1.54       | 0.80     | 2.95 | 1.53          | 0.80     | 2.95 |
| Personal Income (\$70,000-\$79,999)                      | 1.11       | 0.54     | 2.28 | 1.11          | 0.54     | 2.28 |
| Personal Income (\$80,000-\$89,999)                      | 1.19       | 0.47     | 3.02 | 1.19          | 0.47     | 3.03 |
| Personal Income (\$90,000-\$99,999)                      | 1.91       | 0.80     | 4.56 | 1.91          | 0.80     | 4.56 |
| Personal Income (\$100,000-\$149,999)                    | 1.50       | 0.74     | 3.04 | 1.50          | 0.74     | 3.05 |
| Personal Income (More than \$150,000)                    | 2.72       | 1.16     | 6.35 | 2.74          | 1.17     | 6.41 |
| Educational Level (High school graduate)                 | 0.81       | 0.22     | 2.98 | 0.80          | 0.22     | 2.97 |
| Educational Level (Some college credit, no degree)       | 1.28       | 0.37     | 4.49 | 1.29          | 0.37     | 4.53 |
| Educational Level (Trade/Technical/Vocational education) | 1.39       | 0.34     | 5.62 | 1.38          | 0.34     | 5.59 |
| Educational Level (Associate degree)                     | 1.00       | 0.27     | 3.67 | 1.00          | 0.27     | 3.65 |
| Educational Level (Bachelor's degree)                    | 1.04       | 0.30     | 3.63 | 1.05          | 0.30     | 3.65 |
| Educational Level (Master's degree)                      | 1.12       | 0.31     | 4.03 | 1.12          | 0.31     | 4.05 |
| Educational Level (professional degree)                  | 1.37       | 0.26     | 7.05 | 1.37          | 0.26     | 7.04 |
| Educational Level (Doctorate degree)                     | 1.22       | 0.27     | 5.46 | 1.24          | 0.28     | 5.52 |
| Ethnicity (White)                                        | 1.35       | 0.72     | 2.55 | 1.34          | 0.71     | 2.53 |
| Ethnicity (Hispanic, Latinx, Spanish)                    | 1.19       | 0.63     | 2.23 | 1.18          | 0.63     | 2.23 |
| Ethnicity (Black, African American)                      | 0.98       | 0.46     | 2.06 | 0.97          | 0.46     | 2.05 |
| Ethnicity (Asian)                                        | 0.53       | 0.25     | 1.17 | 0.53          | 0.24     | 1.15 |
| Ethnicity (Native)                                       | 0.62       | 0.24     | 1.59 | 0.64          | 0.25     | 1.64 |
| Sex (male=0, female=1)                                   | 0.65       | 0.48     | 0.89 |               |          |      |
| Woman                                                    |            |          |      | 0.67          | 0.49     | 0.91 |
| Non-binary/Gender fluid + Gender=other                   |            |          |      | 0.34          | 0.07     | 1.74 |
| Sample (Sample 1=1)                                      | 1.18       | 0.80     | 1.74 | 1.18          | 0.80     | 1.74 |
| <b>Goodness of Fit</b>                                   |            |          |      |               |          |      |
| Deviance/df                                              | 1.005      |          |      | 1.005         |          |      |
| Pearson Chi-Square/df                                    | 1.015      |          |      | 1.014         |          |      |
| Loglikelihood                                            | -1936.517  |          |      | -1936.050     |          |      |
| AIC                                                      | 3943.033   |          |      | 3944.100      |          |      |
| <b>Omnibus tests</b>                                     |            |          |      |               |          |      |
| Chi-square                                               | 282.699    |          |      | 283.632       |          |      |
| df                                                       | 34         |          |      | 35            |          |      |
| N                                                        | 3887       |          |      | 3887          |          |      |

Note: Participants reporting Native Hawaiian/Pacific Islander, Middle east/North Africa or Other as ethnicity are the reference group for the ethnicity variables. Personal Income < \$10,000 is the reference group for the "Personal Income" variables. Educational level < high school diploma is the reference group for the "Educational Level" variables. The models are computed with robust covariance matrix estimation.

**Table S44.** Logistic regression predicting Overweight (BMI<25=0, BMI≥25 =1) (combined samples).

|                                                          | <i>SEX</i> |          |      | <i>GENDER</i> |          |      |
|----------------------------------------------------------|------------|----------|------|---------------|----------|------|
|                                                          | Odds ratio | 99.9% CI |      | Odds ratio    | 99.9% CI |      |
| Caregiver strain                                         | 1.21       | 1.07     | 1.38 | 1.22          | 1.07     | 1.38 |
| Work strain                                              | 1.10       | 0.95     | 1.29 | 1.10          | 0.94     | 1.29 |
| Independence                                             | 1.01       | 0.85     | 1.20 | 1.01          | 0.85     | 1.19 |
| Risk-taking                                              | 0.84       | 0.72     | 0.97 | 0.84          | 0.72     | 0.97 |
| Emotional intelligence                                   | 1.00       | 0.85     | 1.18 | 1.00          | 0.85     | 1.18 |
| Social support                                           | 1.04       | 0.93     | 1.17 | 1.04          | 0.93     | 1.16 |
| Discrimination                                           | 1.24       | 1.03     | 1.48 | 1.23          | 1.03     | 1.47 |
| Year of birth                                            | 0.97       | 0.97     | 0.98 | 0.97          | 0.97     | 0.98 |
| Personal Income (\$10,000-\$19,999)                      | 0.96       | 0.63     | 1.46 | 0.97          | 0.64     | 1.47 |
| Personal Income (\$20,000-\$29,999)                      | 1.01       | 0.66     | 1.53 | 1.02          | 0.67     | 1.55 |
| Personal Income (\$30,000-\$39,999)                      | 0.92       | 0.59     | 1.43 | 0.94          | 0.61     | 1.47 |
| Personal Income (\$40,000-\$49,999)                      | 0.93       | 0.59     | 1.48 | 0.95          | 0.60     | 1.50 |
| Personal Income (\$50,000-\$59,999)                      | 1.30       | 0.79     | 2.13 | 1.32          | 0.81     | 2.17 |
| Personal Income (\$60,000-\$69,999)                      | 1.28       | 0.72     | 2.25 | 1.30          | 0.74     | 2.30 |
| Personal Income (\$70,000-\$79,999)                      | 1.71       | 0.94     | 3.12 | 1.74          | 0.96     | 3.18 |
| Personal Income (\$80,000-\$89,999)                      | 1.08       | 0.51     | 2.29 | 1.10          | 0.52     | 2.33 |
| Personal Income (\$90,000-\$99,999)                      | 1.38       | 0.62     | 3.09 | 1.39          | 0.63     | 3.07 |
| Personal Income (\$100,000-\$149,999)                    | 1.03       | 0.55     | 1.90 | 1.05          | 0.57     | 1.94 |
| Personal Income (More than \$150,000)                    | 1.09       | 0.47     | 2.54 | 1.08          | 0.47     | 2.51 |
| Educational Level (High school graduate)                 | 0.59       | 0.20     | 1.72 | 0.59          | 0.20     | 1.72 |
| Educational Level (Some college credit, no degree)       | 0.68       | 0.24     | 1.92 | 0.68          | 0.24     | 1.92 |
| Educational Level (Trade/Technical/Vocational education) | 0.53       | 0.16     | 1.73 | 0.53          | 0.16     | 1.72 |
| Educational Level (Associate degree)                     | 0.60       | 0.21     | 1.77 | 0.60          | 0.20     | 1.75 |
| Educational Level (Bachelor's degree)                    | 0.45       | 0.16     | 1.28 | 0.45          | 0.16     | 1.27 |
| Educational Level (Master's degree)                      | 0.52       | 0.18     | 1.52 | 0.51          | 0.17     | 1.50 |
| Educational Level (professional degree)                  | 0.33       | 0.08     | 1.30 | 0.33          | 0.08     | 1.30 |
| Educational Level (Doctorate degree)                     | 0.39       | 0.11     | 1.38 | 0.39          | 0.11     | 1.37 |
| Ethnicity (White)                                        | 1.05       | 0.61     | 1.81 | 1.07          | 0.62     | 1.85 |
| Ethnicity (Hispanic, Latinx, Spanish)                    | 1.42       | 0.80     | 2.50 | 1.44          | 0.82     | 2.53 |
| Ethnicity (Black, African American)                      | 1.38       | 0.74     | 2.58 | 1.39          | 0.75     | 2.59 |
| Ethnicity (Asian)                                        | 0.50       | 0.27     | 0.94 | 0.51          | 0.27     | 0.95 |
| Ethnicity (Native)                                       | 1.55       | 0.69     | 3.44 | 1.57          | 0.70     | 3.50 |
| Sex (male=0, female=1)                                   | 0.67       | 0.51     | 0.87 |               |          |      |
| Woman                                                    |            |          |      | 0.68          | 0.52     | 0.88 |
| Non-binary/Gender fluid + Gender=other                   |            |          |      | 0.76          | 0.24     | 2.42 |
| Sample (Sample 1=1)                                      | 0.90       | 0.65     | 1.24 | 0.90          | 0.66     | 1.25 |
| <b>Goodness of Fit</b>                                   |            |          |      |               |          |      |
| Deviance/df                                              | 1.296      |          |      | 1.296         |          |      |
| Pearson Chi-Square/df                                    | 1.010      |          |      | 1.010         |          |      |
| Loglikelihood                                            | -2472.355  |          |      | -2478.706     |          |      |
| AIC                                                      | 5014.711   |          |      | 5029.412      |          |      |
| <b>Omnibus tests</b>                                     |            |          |      |               |          |      |
| Chi-square                                               | 267.790    |          |      | 268.953       |          |      |
| df                                                       | 34         |          |      | 35            |          |      |
| N                                                        | 3851       |          |      | 3860          |          |      |

Note: Participants reporting Native Hawaiian/Pacific Islander, Middle east/North Africa or Other as ethnicity are the reference group for the ethnicity variables. Personal Income < \$10,000 is the reference group for the “Personal Income” variables. Educational level < high school diploma is the reference group for the “Educational Level” variables. The models are computed with robust covariance matrix estimation.

**Table S45.** Final 25 survey items

1. Please specify your current employment status:

- Employed Full-time
- Employed Part-time
- Homemaker
- Retired
- Student
- Unemployed

2. People see themselves in different ways. There are no right or wrong answers to the following questions. We just want to know what's true for *you*. Choose the answer that best describes you.

i. In general, how prepared are you to take risks?

- Not at all prepared
- Slightly prepared
- Moderately prepared
- Very prepared
- Completely prepared

ii. How prepared are you to take risks....

|                                              | Not at all prepared   | Slightly prepared     | Moderately prepared   | Very prepared         | Completely prepared   |
|----------------------------------------------|-----------------------|-----------------------|-----------------------|-----------------------|-----------------------|
| ...when making financial decisions?          | <input type="radio"/> | <input type="radio"/> | <input type="radio"/> | <input type="radio"/> | <input type="radio"/> |
| ...when it comes to recreational activities? | <input type="radio"/> | <input type="radio"/> | <input type="radio"/> | <input type="radio"/> | <input type="radio"/> |

3. People see themselves in different ways. There are no right or wrong answers to the following questions. We just want to know what's true for *you*. Choose the answer that best describes you.

i. How important is it for you to be independent?

- Extremely important
- Very important
- Moderately important
- Slightly important
- Not at all important

iii. How important is it for you to solve your problems on your own?

- Extremely important
- Very important
- Moderately important
- Slightly important
- Not at all important



4. People see themselves in different ways. There are no right or wrong answers to the following questions. We just want to know what's true for *you*. Choose the answer that best describes you.

i. How often do friends talk to you about their problems?

- Never
- Once in a while
- Sometimes
- Most of the time
- Always

ii. How often do you talk to your friends about your problems?

- Never
- Once in a while
- Sometimes
- Most of the time
- Always

ii. How easy is it for you to express what you are feeling to others?

- Not at all easy
- Slightly easy
- Moderately easy
- Very easy
- Extremely easy

5. Are you currently responsible for taking care of someone in need? By “taking care of someone in need” we mean providing unpaid assistance and support to someone who has physical or psychological needs, such as a child, elder, partner, or disabled family member.

- I am currently responsible for taking care of someone in need
- I have been responsible for taking care of someone in the past
- I have never been responsible for taking care of someone in need
- I am currently responsible for taking care of someone in need, and I have been responsible for taking care of someone in the past

[BRANCHING: These next three questions should be displayed **only** to respondents who are currently responsible for taking care of someone in need. Respondents who are branched out should be assigned the value “Never” in the final coding as responses to these questions].

6. In the past year, how often did you feel **emotionally** exhausted because of your caretaking responsibilities?

- Never
- Once in a while
- Sometimes
- Most of the time
- Always

7. In the past year, how often did you feel **physically** exhausted because of your caretaking responsibilities?

- Never
- Once in a while
- Sometimes
- Most of the time
- Always

8. In the past year, how often have your caretaking responsibilities caused you to worry about the future?

Never

Once in a while

Sometimes

Most of the time

Always

9. We are interested in how you spend your time on an average weekday, Monday through Friday. Please provide your best estimate. On average, how many hours per weekday do you spend on the following. *Total should not exceed 24 hours.*

Work (paid work, studying, internships, etc.) : \_\_\_\_\_

Taking care of someone in need (caring for children, elders, partners in need, etc.) : \_\_\_\_\_

10. We are interested in how you feel about your current job, including your daily work activities as an employee or student. For each of the following questions, select the answer that best describes your work activities. If you have several jobs, please think about the job that you spend most hours doing per week.

[BRANCHING: The next four questions should be displayed **only** to respondents who are currently employed (full-time or part-time) or students. Respondents who are branched out should be assigned the value “Never” in the final coding as responses to these questions].

i. How often does your job require working fast?

- Never
- Once in a while
- Sometimes
- Most of the time
- Always

ii. How often does your job involve repetitive tasks?

- Never
- Once in a while
- Sometimes
- Most of the time
- Always

iii. How often do you feel **emotionally** exhausted from your work activities?

- Never
- Once in a while
- Sometimes
- Most of the time
- Always

iv. How often do you feel **physically** exhausted from your work activities?

- Never
- Once in a while
- Sometimes
- Most of the time
- Always

11. People sometimes look to others for companionship, assistance, or other types of physical or emotional support. The following questions ask you about the support available to you when you need it. Choose the answer that best describes your situation.

i. In the past year, how often did you have someone...

|                                 | Never                 | Once in a while       | Sometimes             | Most of the time      | Always                |
|---------------------------------|-----------------------|-----------------------|-----------------------|-----------------------|-----------------------|
| to show you love and affection? | <input type="radio"/> | <input type="radio"/> | <input type="radio"/> | <input type="radio"/> | <input type="radio"/> |
| to help you with daily chores?  | <input type="radio"/> | <input type="radio"/> | <input type="radio"/> | <input type="radio"/> | <input type="radio"/> |

12. The following questions ask about how often you have felt discriminated against because of your gender. You may not be certain about your answers to these questions, but we would like you to choose the answer that best describes your experience.

i. Because of your gender, how often have you felt discriminated against?

- Never
- Once in a while
- Sometimes
- Most of the time
- Always

ii. Because of your gender how often have you felt discriminated against...

|                             | Never                 | Once in a while       | Sometimes             | Most of the time      | Always                |
|-----------------------------|-----------------------|-----------------------|-----------------------|-----------------------|-----------------------|
| When getting hired          | <input type="radio"/> | <input type="radio"/> | <input type="radio"/> | <input type="radio"/> | <input type="radio"/> |
| When at school              | <input type="radio"/> | <input type="radio"/> | <input type="radio"/> | <input type="radio"/> | <input type="radio"/> |
| When receiving medical care | <input type="radio"/> | <input type="radio"/> | <input type="radio"/> | <input type="radio"/> | <input type="radio"/> |
| In public settings          | <input type="radio"/> | <input type="radio"/> | <input type="radio"/> | <input type="radio"/> | <input type="radio"/> |
| In your family              | <input type="radio"/> | <input type="radio"/> | <input type="radio"/> | <input type="radio"/> | <input type="radio"/> |

13. What was your birth sex?

- Male
- Female
- Intersex
- Other: Please specify: \_\_\_\_\_
- Prefer not to state

14. What is your gender? Please select all that apply.

- Man
- Woman
- Gender fluid/Non-binary
- Other: Please specify: \_\_\_\_\_
- Prefer not to state

15. In what year were you born?

▼ 2000 ... 1900

16. Which categories describe you? (You may choose more than one.)

- White
- Hispanic, Latino, or Spanish
- Black or African American
- Asian
- Native American or Alaska Native
- Middle Eastern or North African
- Native Hawaiian or Pacific Islander
- Other



17. What was your income last calendar year?

Please combine all incomes. "Incomes" include wages, salaries, small business earnings, social security, armed forces pay, special cash bonuses and subsistence allowances.

- Less than \$10,000
- \$10,000 - \$19,999
- \$20,000 - \$29,999
- \$30,000 - \$39,999
- \$40,000 - \$49,999
- \$50,000 - \$59,999
- \$60,000 - \$69,999
- \$70,000 - \$79,999
- \$80,000 - \$89,999
- \$90,000 - \$99,999
- \$100,000 - \$149,999
- \$150,000 - \$199,999
- More than \$200,000
- Prefer not to say

18. What is the highest degree or level of school you have completed? If currently enrolled, please report the highest degree received.

- No schooling completed
- Preschool to 8th grade
- Some high school, no diploma
- High school graduate, diploma or equivalent (GED)
- Some college credit, no degree

- Trade/technical/vocational training
- Associate degree
- Bachelor's degree
- Master's degree
- Professional degree
- Doctorate degree
